# Supplementary material
Source: PubMed Central journal article supplement (PMC4442869)
Supplement: supp_M054874_jlr.M054874-1.pdf [file supp_M054874_jlr.M054874-1.pdf]

## Supplemental Table 1

Probesets significantly upregulated (Fold-change  $\geq 2$ ) or downregulated (Fold-change  $\leq 0,5$ ) in DC-17 versus DC.

The fold change DC-17/DC was calculated from the mean expression in DC-17 (n=5) and DC (n=4).

Statistical analysis was performed using LIMMA and correction for multiple comparisons was done using the Benjamini-Hochberg (BH) method.

probesets significantly upregulated in DC-17 versus DC (Fold-change  $\geq 2$ )

| probeset    | symbol    | DC (mean expression) | DC-17 (mean expression) | fold-change DC-17/DC | BH corrected p values |
|-------------|-----------|----------------------|-------------------------|----------------------|-----------------------|
| 208168_s_at | CHIT1     | 51                   | 37964                   | 745                  | 0.0000986             |
| 234018_s_at | C20orf50  | 4                    | 1194                    | 321                  | 0.002889529           |
| 221602_s_at | TOSO      | 14                   | 3719                    | 262                  | 0.00000946            |
| 212187_x_at | PTGDS     | 150                  | 25501                   | 170                  | 0.0000878             |
| 214240_at   | GAL       | 133                  | 22212                   | 167                  | 0.000831841           |
| 1553151_at  | ATP6V0D2  | 41                   | 6096                    | 149                  | 0.000882405           |
| 202052_s_at | RAI14     | 12                   | 1753                    | 149                  | 0.000770154           |
| 211748_x_at | PTGDS     | 219                  | 31871                   | 146                  | 0.00000946            |
| 221601_s_at | TOSO      | 61                   | 8537                    | 141                  | 0.000813993           |
| 206638_at   | HTR2B     | 16                   | 2113                    | 131                  | 0.000604988           |
| 207030_s_at | CSRP2     | 28                   | 3534                    | 125                  | 0.000432686           |
| 206502_s_at | INSM1     | 14                   | 1553                    | 112                  | 0.001196518           |
| 211663_x_at | PTGDS     | 105                  | 11732                   | 112                  | 0.000107523           |
| 226834_at   | ASAM      | 6                    | 652                     | 107                  | 0.00148951            |
| 206134_at   | ADAMDEC1  | 170                  | 17427                   | 103                  | 0.001243074           |
| 201117_s_at | CPE       | 6                    | 533                     | 96                   | 0.000778748           |
| 212062_at   | ATP9A     | 11                   | 1027                    | 90                   | 0.000769834           |
| 238018_at   | LOC285016 | 6                    | 486                     | 87                   | 0.000886409           |
| 215177_s_at | ITGA6     | 12                   | 963                     | 77                   | 0.000702631           |
| 204983_s_at | GPC4      | 89                   | 6821                    | 77                   | 0.000948343           |
| 237186_at   |           | 19                   | 1467                    | 76                   | 0.000623224           |
| 209396_s_at | CHI3L1    | 544                  | 40330                   | 74                   | 0.006255972           |
| 214390_s_at | BCAT1     | 36                   | 2458                    | 69                   | 0.001269936           |
| 229876_at   | PHKA1     | 6                    | 409                     | 68                   | 0.000418667           |
| 214511_x_at | FCGR1A    | 76                   | 5184                    | 68                   | 0.003225438           |
| 219263_at   | RNF128    | 20                   | 1326                    | 67                   | 0.002809076           |
| 216950_s_at | FCGR1A    | 78                   | 5142                    | 66                   | 0.001665308           |
| 204984_at   | GPC4      | 96                   | 5863                    | 61                   | 0.00148951            |
| 1553706_at  | FLJ90724  | 36                   | 2150                    | 59                   | 0.001423712           |
| 214452_at   | BCAT1     | 68                   | 4016                    | 59                   | 0.002969263           |
| 232277_at   | SLC28A3   | 65                   | 3820                    | 59                   | 0.000923481           |
| 210138_at   | RGS20     | 38                   | 2176                    | 58                   | 0.001573025           |
| 231928_at   | HES2      | 17                   | 934                     | 57                   | 0.000473753           |
| 205342_s_at | SULT1C1   | 79                   | 4335                    | 55                   | 0.00068589            |
| 203695_s_at | DFNA5     | 131                  | 7063                    | 54                   | 0.001094852           |
| 219225_at   | PGBD5     | 26                   | 1367                    | 52                   | 0.00068589            |
| 210402_at   | KCNJ1     | 34                   | 1753                    | 52                   | 0.001445476           |
| 242871_at   | MPRG      | 37                   | 1919                    | 51                   | 0.009813144           |
| 216834_at   | RGS1      | 196                  | 10009                   | 51                   | 0.001948361           |
| 236313_at   | CDKN2B    | 9                    | 450                     | 50                   | 0.001157292           |
| 212884_x_at | APOE      | 725                  | 35527                   | 49                   | 0.000178367           |
| 229313_at   | TMEM16E   | 33                   | 1627                    | 49                   | 0.00037757            |
| 238091_at   |           | 10                   | 467                     | 48                   | 0.001196518           |
| 208791_at   | CLU       | 66                   | 3171                    | 48                   | 0.003478673           |
| 220333_at   | MPRG      | 6                    | 264                     | 48                   | 0.005160543           |
| 219355_at   | FLJ10178  | 6                    | 294                     | 47                   | 0.000054              |
| 209230_s_at | P8        | 114                  | 5180                    | 46                   | 0.001361336           |
| 238780_s_at |           | 76                   | 3309                    | 43                   | 0.001301147           |
| 226517_at   | BCAT1     | 247                  | 10639                   | 43                   | 0.009162902           |
| 231688_at   |           | 23                   | 996                     | 43                   | 0.002035817           |
| 218720_x_at | PSK-1     | 16                   | 662                     | 42                   | 0.00031835            |
| 205343_at   | SULT1C1   | 25                   | 1058                    | 42                   | 0.001784098           |
| 229242_at   |           | 52                   | 2217                    | 42                   | 0.00132752            |
| 223681_s_at | INADL     | 3                    | 126                     | 41                   | 0.00068589            |
| 227915_at   | ASB2      | 9                    | 375                     | 41                   | 0.000769949           |
| 221900_at   | COL8A2    | 92                   | 3744                    | 40                   | 0.004052912           |
| 209395_at   | CHI3L1    | 892                  | 35956                   | 40                   | 0.004022345           |
| 206471_s_at | PLXNC1    | 70                   | 2787                    | 40                   | 0.000419704           |
| 226301_at   | C6orf192  | 153                  | 6085                    | 40                   | 0.003320727           |
| 207092_at   | LEP       | 5                    | 196                     | 40                   | 0.002924826           |
| 204787_at   | Z39IG     | 71                   | 2772                    | 39                   | 0.007307079           |
| 213553_x_at | APOC1     | 1 107                | 43123                   | 39                   | 0.003854828           |
| 210657_s_at | PNUTL2    | 6                    | 237                     | 39                   | 0.004681701           |
| 220380_at   | DLAD      | 55                   | 2136                    | 39                   | 0.002919241           |
| 203979_at   | CYP27A1   | 273                  | 10520                   | 39                   | 0.000418667           |
| 227742_at   | CLIC6     | 15                   | 577                     | 39                   | 0.001030236           |
| 202988_s_at | RGS1      | 58                   | 2223                    | 38                   | 0.005776524           |
| 225285_at   | BCAT1     | 345                  | 13020                   | 38                   | 0.006157835           |
| 205681_at   | BCL2A1    | 341                  | 12753                   | 37                   | 0.003174669           |
| 226955_at   | FLJ36748  | 131                  | 4843                    | 37                   | 0.003225438           |
| 210553_x_at | PACE4     | 6                    | 206                     | 36                   | 0.001105135           |
| 205997_at   | ADAM28    | 40                   | 1416                    | 35                   | 0.001375041           |

|              |           |       |       |    |             |
|--------------|-----------|-------|-------|----|-------------|
| 211470_s_at  | SULT1C1   | 121   | 4239  | 35 | 0.006180927 |
| 237883_at    |           | 90    | 3133  | 35 | 0.000847387 |
| 1553153_at   | ATP6V0D2  | 137   | 4668  | 34 | 0.0000432   |
| 203382_s_at  | APOE      | 1 066 | 36175 | 34 | 0.003899665 |
| 215925_s_at  | CD72      | 9     | 299   | 34 | 0.000816709 |
| 214724_at    | DIXDC1    | 14    | 485   | 34 | 0.000769949 |
| 202134_s_at  | TAZ       | 21    | 699   | 33 | 0.000549749 |
| 203215_s_at  | MYO6      | 6     | 201   | 33 | 0.000643197 |
| 206393_at    | TNNI2     | 10    | 333   | 32 | 0.000163655 |
| 201116_s_at  | CPE       | 16    | 504   | 32 | 0.000789183 |
| 203632_s_at  | GPRC5B    | 25    | 784   | 32 | 0.001688076 |
| 240323_at    | FXVD6     | 10    | 320   | 32 | 0.000904172 |
| 205844_at    | VNN1      | 49    | 1549  | 32 | 0.002080113 |
| 205922_at    | VNN2      | 26    | 806   | 31 | 0.00261607  |
| 218532_s_at  | FLJ20152  | 46    | 1396  | 31 | 0.000163655 |
| 208792_s_at  | CLU       | 151   | 4454  | 29 | 0.000121206 |
| 211887_x_at  | MSR1      | 122   | 3588  | 29 | 0.00197542  |
| 202450_s_at  | CTSK      | 624   | 18349 | 29 | 0.000191079 |
| 213241_at    | PLXNC1    | 540   | 15857 | 29 | 0.000163655 |
| 205422_s_at  | ITGBL1    | 7     | 212   | 29 | 0.002183623 |
| 203029_s_at  | PTPRN2    | 15    | 425   | 29 | 0.001606431 |
| 219714_s_at  | CACNA2D3  | 16    | 462   | 29 | 0.001956272 |
| 239287_at    |           | 203   | 5883  | 29 | 0.00118044  |
| 226632_at    | CYGB      | 39    | 1121  | 29 | 0.004981991 |
| 208711_s_at  | CCND1     | 35    | 1010  | 29 | 0.004361581 |
| 242465_at    |           | 85    | 2449  | 29 | 0.000971539 |
| 218638_s_at  | SPON2     | 255   | 7336  | 29 | 0.001776451 |
| 228082_at    | ASAM      | 10    | 295   | 28 | 0.008620583 |
| 212589_at    | RRAS2     | 5     | 128   | 28 | 0.001030551 |
| 218922_s_at  | LASS4     | 6     | 166   | 28 | 0.000113064 |
| 207329_at    | MMP8      | 22    | 612   | 28 | 0.008501538 |
| 217897_at    | FXVD6     | 74    | 2044  | 28 | 0.000948343 |
| 222392_x_at  | PERP      | 60    | 1669  | 28 | 0.005105237 |
| 1558034_s_at | CP        | 4     | 113   | 28 | 0.005764689 |
| 212667_at    | SPARC     | 45    | 1243  | 28 | 0.00197542  |
| 214028_x_at  | TDRD3     | 213   | 5838  | 27 | 0.000926018 |
| 201656_at    | ITGA6     | 78    | 2124  | 27 | 0.000611145 |
| 1553155_x_at | ATP6V0D2  | 115   | 3095  | 27 | 0.000418667 |
| 207738_s_at  | NCKAP1    | 69    | 1853  | 27 | 0.000702631 |
| 1553572_a_at | CYGB      | 12    | 336   | 27 | 0.002643309 |
| 1552436_a_at | CDH23     | 13    | 341   | 27 | 0.006651773 |
| 203381_s_at  | APOE      | 1 280 | 34099 | 27 | 0.00769406  |
| 203435_s_at  | MME       | 12    | 321   | 26 | 0.001393737 |
| 204430_s_at  | SLC2A5    | 240   | 6305  | 26 | 0.002338195 |
| 229377_at    | GRTP1     | 9     | 244   | 26 | 0.00250827  |
| 221035_s_at  | TEX14     | 18    | 470   | 26 | 0.000948343 |
| 224215_s_at  | DLL1      | 5     | 119   | 26 | 0.000178367 |
| 215120_s_at  | SAMD4     | 4     | 98    | 26 | 0.000432686 |
| 224435_at    | C10orf58  | 274   | 6796  | 25 | 0.000087    |
| 203786_s_at  | TPD52L1   | 31    | 744   | 24 | 0.000163655 |
| 226302_at    | ATP8B1    | 8     | 197   | 24 | 0.002378392 |
| 212091_s_at  | COL6A1    | 17    | 411   | 24 | 0.000368804 |
| 208423_s_at  | MSR1      | 123   | 2959  | 24 | 0.003066467 |
| 206470_at    | PLXNC1    | 80    | 1920  | 24 | 0.003865559 |
| 205695_at    | SDS       | 169   | 4057  | 24 | 0.001101623 |
| 207907_at    | TNFSF14   | 49    | 1172  | 24 | 0.003841022 |
| 221584_s_at  | KCNMA1    | 167   | 3974  | 24 | 0.00487626  |
| 228155_at    | C10orf58  | 886   | 20961 | 24 | 0.000126318 |
| 221577_x_at  | GDF15     | 107   | 2515  | 23 | 0.005795157 |
| 221583_s_at  | KCNMA1    | 25    | 583   | 23 | 0.003133945 |
| 200986_at    | SERPING1  | 115   | 2669  | 23 | 0.002202964 |
| 203646_at    | FDX1      | 738   | 16846 | 23 | 0.000178367 |
| 215495_s_at  | SAMD4     | 34    | 781   | 23 | 0.001665308 |
| 201474_s_at  | ITGA3     | 70    | 1568  | 22 | 0.003761315 |
| 227727_at    | MARGPRF   | 26    | 573   | 22 | 0.001105248 |
| 201313_at    | ENO2      | 24    | 532   | 22 | 0.003848334 |
| 225755_at    | MGC35097  | 275   | 5982  | 22 | 0.000163655 |
| 203131_at    | PDGFRA    | 13    | 292   | 22 | 0.002096506 |
| 202575_at    | CRABP2    | 647   | 13916 | 22 | 0.005536467 |
| 203216_s_at  | MYO6      | 48    | 1031  | 21 | 0.000140466 |
| 220841_s_at  | AHI1      | 14    | 298   | 21 | 0.002559332 |
| 1554018_at   | GPNMB     | 809   | 17098 | 21 | 0.002854658 |
| 214993_at    | LOC253982 | 15    | 309   | 21 | 0.001303034 |
| 206726_at    | PGDS      | 144   | 3034  | 21 | 0.000923481 |
| 221530_s_at  | BHLHB3    | 141   | 2954  | 21 | 0.00507681  |
| 203920_at    | NR1H3     | 414   | 8599  | 21 | 0.000702631 |
| 217979_at    | TM4SF13   | 140   | 2898  | 21 | 0.003389359 |
| 204259_at    | MMP7      | 146   | 3017  | 21 | 0.005038652 |
| 236176_at    |           | 52    | 1069  | 20 | 0.001303931 |
| 227702_at    | CYP4X1    | 14    | 275   | 20 | 0.00071051  |
| 229095_s_at  | LIMS3     | 6     | 123   | 20 | 0.001393737 |
| 211382_s_at  | TACC2     | 11    | 223   | 20 | 0.00096724  |
| 212224_at    | ALDH1A1   | 665   | 12957 | 19 | 0.005124276 |

|              |              |      |       |    |             |
|--------------|--------------|------|-------|----|-------------|
| 219637_at    | FLJ12584     | 68   | 1315  | 19 | 0.001665308 |
| 203936_s_at  | MMP9         | 2794 | 54055 | 19 | 0.000098    |
| 1554489_a_at | BITE         | 14   | 270   | 19 | 0.003215508 |
| 209791_at    | PADI2        | 71   | 1346  | 19 | 0.000968666 |
| 218266_s_at  | FREQ         | 19   | 360   | 19 | 0.00096724  |
| 235182_at    | C20orf82     | 18   | 339   | 19 | 0.007010655 |
| 218510_x_at  | FLJ20152     | 34   | 619   | 18 | 0.001320785 |
| 1553769_at   | SLAMF9       | 40   | 730   | 18 | 0.007841297 |
| 227996_at    | FARP1        | 9    | 172   | 18 | 0.000405156 |
| 207213_s_at  | USP2         | 8    | 146   | 18 | 0.000769949 |
| 223125_s_at  | C1orf21      | 80   | 1410  | 18 | 0.0000436   |
| 201185_at    | PRSS11       | 35   | 610   | 17 | 0.002035817 |
| 1552365_at   | SCIN         | 30   | 515   | 17 | 0.008529668 |
| 203404_at    | ARMCX2       | 68   | 1188  | 17 | 0.003144705 |
| 206914_at    | CRTAM        | 236  | 4048  | 17 | 0.00148951  |
| 233337_s_at  | PSK-1        | 41   | 703   | 17 | 0.000972245 |
| 201387_s_at  | UCHL1        | 207  | 3457  | 17 | 0.005776524 |
| 1555579_s_at | PTPRM        | 65   | 1074  | 17 | 0.000508758 |
| 201810_s_at  | SH3BP5       | 227  | 3774  | 17 | 0.004050464 |
| 206140_at    | LHX2         | 7    | 120   | 17 | 0.001665308 |
| 204468_s_at  | TIE          | 46   | 744   | 16 | 0.003669932 |
| 220484_at    | MCOLN3       | 77   | 1238  | 16 | 0.004270136 |
| 229620_at    | SEPP1        | 72   | 1154  | 16 | 0.002854658 |
| 215058_at    | MGC24039     | 13   | 213   | 16 | 0.003072129 |
| 1553787_at   | MGC35558     | 181  | 2857  | 16 | 0.001264231 |
| 52651_at     | COL8A2       | 127  | 2007  | 16 | 0.000904172 |
| 203153_at    | IFIT1        | 101  | 1592  | 16 | 0.000483689 |
| 201801_s_at  | SLC29A1      | 94   | 1484  | 16 | 0.000972245 |
| 209571_at    | CIR          | 603  | 9321  | 15 | 0.001514611 |
| 1558549_s_at | VNN1         | 25   | 381   | 15 | 0.006178867 |
| 1562747_at   |              | 4    | 63    | 15 | 0.000327886 |
| 211126_s_at  | CSRP2        | 100  | 1524  | 15 | 0.001998902 |
| 203535_at    | S100A9       | 892  | 13526 | 15 | 0.002362958 |
| 219557_s_at  | NRIP3        | 256  | 3883  | 15 | 0.000870766 |
| 231899_at    | KIAA1726     | 116  | 1759  | 15 | 0.002639846 |
| 222900_at    | NRIP3        | 223  | 3358  | 15 | 0.001393737 |
| 201215_at    | PLS3         | 24   | 362   | 15 | 0.004846564 |
| 210664_s_at  | TFPI         | 70   | 1045  | 15 | 0.00478907  |
| 227782_at    |              | 18   | 272   | 15 | 0.003380629 |
| 219159_s_at  | SLAMF7       | 218  | 3256  | 15 | 0.000931488 |
| 240264_at    |              | 48   | 719   | 15 | 0.000457356 |
| 211817_s_at  | KCNJ5        | 28   | 413   | 15 | 0.002096506 |
| 202133_at    | TAZ          | 10   | 146   | 15 | 0.005432835 |
| 209676_at    | TFPI         | 59   | 863   | 15 | 0.002569456 |
| 214782_at    | EMS1         | 4    | 58    | 15 | 0.005152509 |
| 201540_at    | FHL1         | 249  | 3606  | 15 | 0.005605276 |
| 215856_at    | CD33L3       | 321  | 4631  | 14 | 0.000109545 |
| 222838_at    | SLAMF7       | 571  | 8232  | 14 | 0.002867675 |
| 220475_at    | SLC28A3      | 38   | 548   | 14 | 0.007585777 |
| 206696_at    | GPR143       | 35   | 498   | 14 | 0.00985653  |
| 230354_at    |              | 8    | 114   | 14 | 0.001969869 |
| 203324_s_at  | CAV2         | 20   | 284   | 14 | 0.004432414 |
| 213258_at    | TFPI         | 172  | 2443  | 14 | 0.007070381 |
| 227522_at    | LOC134147    | 109  | 1548  | 14 | 0.000178367 |
| 205450_at    | PHKA1        | 45   | 635   | 14 | 0.00068589  |
| 219197_s_at  | SCUBE2       | 13   | 190   | 14 | 0.000399477 |
| 234306_s_at  | SLAMF7       | 95   | 1335  | 14 | 0.00152435  |
| 218678_at    | NES          | 28   | 395   | 14 | 0.003121689 |
| 213913_s_at  | KIAA0984     | 13   | 176   | 14 | 0.001358003 |
| 218723_s_at  | RGC32        | 1402 | 19404 | 14 | 0.00273508  |
| 222934_s_at  | CLECF9       | 73   | 1003  | 14 | 0.001377004 |
| 205206_at    | KAL1         | 111  | 1531  | 14 | 0.001205147 |
| 219837_s_at  | C17          | 45   | 617   | 14 | 0.004166632 |
| 218999_at    | FLJ11000     | 360  | 4928  | 14 | 0.000163655 |
| 228873_at    | COL22A1      | 11   | 154   | 14 | 0.001500924 |
| 204187_at    | GMPT         | 39   | 531   | 14 | 0.000557367 |
| 203733_at    | DEXI         | 179  | 2439  | 14 | 0.00206721  |
| 233849_s_at  | ARHGAP5      | 68   | 924   | 14 | 0.003842627 |
| 201069_at    | MMP2         | 146  | 1971  | 14 | 0.000296676 |
| 229254_at    | DKFZp761N117 |      | 90    | 14 | 0.003806407 |
| 219271_at    | GALNT14      | 55   | 739   | 13 | 0.002734793 |
| 229490_s_at  | IQGAP3       | 37   | 490   | 13 | 0.004895374 |
| 222043_at    | CLU          | 21   | 283   | 13 | 0.003020336 |
| 205366_s_at  | HOXB6        | 21   | 278   | 13 | 0.005221138 |
| 47553_at     | DFNB31       | 6    | 76    | 13 | 0.000778748 |
| 228461_at    | SH3MD4       | 100  | 1307  | 13 | 0.002082798 |
| 201811_x_at  | SH3BP5       | 813  | 10585 | 13 | 0.000684189 |
| 228342_s_at  | MIDORI       | 27   | 346   | 13 | 0.001161149 |
| 222878_s_at  | OTUB2        | 24   | 302   | 13 | 0.006255972 |
| 202289_s_at  | TACC2        | 39   | 503   | 13 | 0.004209232 |
| 217963_s_at  | NGFRAP1      | 616  | 7872  | 13 | 0.005665059 |
| 205478_at    | PPP1R1A      | 10   | 128   | 13 | 0.002678777 |
| 208089_s_at  | TDRD3        | 416  | 5290  | 13 | 0.000968666 |

|              |             |       |       |    |             |
|--------------|-------------|-------|-------|----|-------------|
| 1554340_a_at | LOC374946   | 12    | 149   | 13 | 0.000870766 |
| 231969_at    | DKFZp762K22 | 35    | 444   | 13 | 0.002738451 |
| 208170_s_at  | TRIM31      | 2     | 31    | 13 | 0.002430641 |
| 225102_at    | MGLL        | 455   | 5713  | 13 | 0.001858679 |
| 228716_at    | THRB        | 49    | 607   | 13 | 0.005380833 |
| 225207_at    | PDK4        | 62    | 765   | 12 | 0.001445476 |
| 206058_at    | SLC6A12     | 80    | 994   | 12 | 0.004702542 |
| 224499_s_at  | AICDA       | 8     | 103   | 12 | 0.006539146 |
| 205190_at    | PLS1        | 26    | 316   | 12 | 0.002704743 |
| 232662_x_at  |             | 89    | 1079  | 12 | 0.000923481 |
| 229538_s_at  | IQGAP3      | 57    | 693   | 12 | 0.003606606 |
| 225259_at    |             | 99    | 1210  | 12 | 0.003663759 |
| 228080_at    | LOC143903   | 52    | 626   | 12 | 0.009139197 |
| 203647_s_at  | FDX1        | 1 664 | 20100 | 12 | 0.000399477 |
| 201976_s_at  | MYO10       | 81    | 979   | 12 | 0.003112693 |
| 212776_s_at  | KIAA0657    | 11    | 136   | 12 | 0.000265521 |
| 218211_s_at  | MLPH        | 124   | 1488  | 12 | 0.00315082  |
| 211026_s_at  | MGLL        | 666   | 7799  | 12 | 0.000991999 |
| 204429_s_at  | SLC2A5      | 203   | 2370  | 12 | 0.00056818  |
| 209881_s_at  | LAT         | 65    | 755   | 12 | 0.003225261 |
| 217744_s_at  | PERP        | 38    | 442   | 12 | 0.009675579 |
| 201286_at    | SDC1        | 20    | 236   | 12 | 0.007010655 |
| 1561737_at   |             | 21    | 237   | 12 | 0.003405859 |
| 217104_at    | LOC283687   | 24    | 278   | 11 | 0.002454434 |
| 232636_at    | SLITRK4     | 34    | 390   | 11 | 0.001094852 |
| 239579_at    | ABHD7       | 21    | 233   | 11 | 0.000870766 |
| 209540_at    | IGF1        | 127   | 1430  | 11 | 0.004700596 |
| 219998_at    | HSPC159     | 24    | 263   | 11 | 0.002082798 |
| 233857_s_at  | ASB2        | 26    | 289   | 11 | 0.004949024 |
| 210613_s_at  | SYNGR1      | 232   | 2596  | 11 | 0.000919582 |
| 219410_at    | FLJ10134    | 81    | 905   | 11 | 0.003975085 |
| 214841_at    | FLJ38993    | 252   | 2792  | 11 | 0.000769949 |
| 219274_at    | TM4SF12     | 22    | 247   | 11 | 0.001541909 |
| 223567_at    | SEMA6B      | 32    | 351   | 11 | 0.00444683  |
| 1558689_a_at |             | 5     | 55    | 11 | 0.003526075 |
| 208608_s_at  | SNTB1       | 44    | 474   | 11 | 0.003045581 |
| 235825_at    | CHCHD5      | 14    | 155   | 11 | 0.003589953 |
| 229930_at    |             | 15    | 157   | 11 | 0.004023978 |
| 202839_s_at  | NDUFB7      | 5 392 | 57400 | 11 | 0.004738369 |
| 212845_at    | SAMD4       | 272   | 2862  | 11 | 0.000968666 |
| 223432_at    | OSBP2       | 17    | 175   | 11 | 0.009943016 |
| 223767_at    | GPR84       | 30    | 316   | 11 | 0.008012701 |
| 218825_at    | EGFL7       | 31    | 325   | 10 | 0.000702631 |
| 1555539_at   | SDS         | 12    | 124   | 10 | 0.000861051 |
| 203329_at    | PTPRM       | 59    | 616   | 10 | 0.007119827 |
| 204415_at    | G1P3        | 308   | 3206  | 10 | 0.000769949 |
| 204561_x_at  | APOC2       | 783   | 8095  | 10 | 0.003417005 |
| 237215_s_at  | TFRC        | 364   | 3758  | 10 | 0.002077936 |
| 208269_s_at  | ADAM28      | 25    | 258   | 10 | 0.000623224 |
| 235938_at    |             | 30    | 303   | 10 | 0.004616654 |
| 219636_s_at  | FLJ12584    | 59    | 603   | 10 | 0.009604868 |
| 1553997_a_at | LOC253982   | 129   | 1307  | 10 | 0.000769949 |
| 213924_at    | MPPPE1      | 14    | 142   | 10 | 0.005197031 |
| 202609_at    | EPS8        | 497   | 5006  | 10 | 0.004525871 |
| 229302_at    | MGC33926    | 10    | 100   | 10 | 0.006240688 |
| 229438_at    | FAM20C      | 41    | 407   | 10 | 0.008767954 |
| 213428_s_at  | COL6A1      | 222   | 2208  | 10 | 0.004093992 |
| 236473_at    | KIAA1345    | 14    | 141   | 10 | 0.003320727 |
| 211434_s_at  | CCR12       | 281   | 2786  | 10 | 0.000789183 |
| 217767_at    | C3          | 113   | 1124  | 10 | 0.004596465 |
| 232812_at    |             | 7     | 65    | 10 | 0.000457356 |
| 202672_s_at  | ATF3        | 845   | 8354  | 10 | 0.001892393 |
| 236434_at    | PES1        | 14    | 143   | 10 | 0.006593858 |
| 232042_at    | TTYH2       | 24    | 236   | 10 | 0.001990927 |
| 1552367_a_at | SCIN        | 18    | 173   | 10 | 0.009297739 |
| 235467_s_at  | KCNC4       | 22    | 209   | 10 | 0.006910309 |
| 200766_at    | CTSD        | 1 783 | 17149 | 10 | 0.001533411 |
| 226803_at    | Shax3       | 43    | 410   | 10 | 0.003497034 |
| 214992_s_at  | DNASE2      | 251   | 2388  | 10 | 0.001784098 |
| 228728_at    | FLJ21986    | 142   | 1335  | 9  | 0.000813993 |
| 228523_at    | NANOS1      | 32    | 299   | 9  | 0.001157292 |
| 234317_s_at  | DKFZp762K22 | 22    | 208   | 9  | 0.003001814 |
| 220193_at    | FLJ22938    | 54    | 502   | 9  | 0.001505326 |
| 203423_at    | RBP1        | 154   | 1433  | 9  | 0.00197542  |
| 215049_x_at  | CD163       | 2 046 | 18901 | 9  | 0.006589381 |
| 212336_at    | EPB41L1     | 41    | 378   | 9  | 0.008442384 |
| 229797_at    | MCOLN3      | 217   | 2002  | 9  | 0.002831008 |
| 204975_at    | EMP2        | 32    | 299   | 9  | 0.004441436 |
| 225864_at    | NSE2        | 46    | 427   | 9  | 0.002080113 |
| 202481_at    | DHRS3       | 203   | 1865  | 9  | 0.001873443 |
| 214074_s_at  | EMS1        | 69    | 628   | 9  | 0.003478673 |
| 219963_at    | DUSP13      | 110   | 1003  | 9  | 0.003431265 |
| 1569069_s_at | TDRD3       | 522   | 4714  | 9  | 0.00250827  |

|              |             |       |       |   |             |
|--------------|-------------|-------|-------|---|-------------|
| 231304_at    | PPP3R2      | 6     | 53    | 9 | 0.002559332 |
| 208893_s_at  | DUSP6       | 312   | 2798  | 9 | 0.000533788 |
| 218330_s_at  | NAV2        | 36    | 324   | 9 | 0.002198662 |
| 209736_at    | SOX13       | 36    | 324   | 9 | 0.000880882 |
| 221081_s_at  | FLJ22457    | 499   | 4438  | 9 | 0.00197542  |
| 219327_s_at  | GPRC5C      | 18    | 157   | 9 | 0.004354621 |
| 232504_at    | LOC285628   | 78    | 695   | 9 | 0.001384521 |
| 223952_x_at  | DHRS9       | 509   | 4517  | 9 | 0.008893325 |
| 223058_at    | C10orf45    | 460   | 4082  | 9 | 0.000304262 |
| 206856_at    | LILRB5      | 184   | 1628  | 9 | 0.002794001 |
| 203066_at    | GALNAC4S-6S | 743   | 6567  | 9 | 0.00590369  |
| 229657_at    | THRB        | 28    | 248   | 9 | 0.006150998 |
| 238454_at    | ZNF540      | 10    | 91    | 9 | 0.008169631 |
| 210298_x_at  | FHL1        | 47    | 409   | 9 | 0.007032035 |
| 218627_at    | FLJ11259    | 726   | 6380  | 9 | 0.000178367 |
| 204118_at    | CD48        | 670   | 5882  | 9 | 0.000231658 |
| 202947_s_at  | GYPC        | 176   | 1542  | 9 | 0.000880882 |
| 233669_s_at  | RNF30       | 14    | 127   | 9 | 0.006477234 |
| 204575_s_at  | MMP19       | 355   | 3106  | 9 | 0.000769949 |
| 203645_s_at  | CD163       | 2 175 | 18975 | 9 | 0.007010655 |
| 1570153_at   | FLJ20449    | 11    | 99    | 9 | 0.008667364 |
| 213355_at    | SIAT10      | 220   | 1898  | 9 | 0.001441103 |
| 209035_at    | MDK         | 31    | 266   | 9 | 0.009813144 |
| 242253_at    |             | 56    | 477   | 8 | 0.000705515 |
| 202149_at    | NEDD9       | 47    | 401   | 8 | 0.000886409 |
| 238332_at    | ANKRD29     | 71    | 598   | 8 | 0.009724471 |
| 209933_s_at  | CMRF-35H    | 544   | 4586  | 8 | 0.006327829 |
| 209785_s_at  | PLA2G4C     | 324   | 2730  | 8 | 0.004538949 |
| 206028_s_at  | MERTK       | 182   | 1525  | 8 | 0.000880882 |
| 224735_at    | MGC20446    | 1 373 | 11511 | 8 | 0.0000436   |
| 212949_at    | BRRN1       | 1 558 | 13053 | 8 | 0.002035817 |
| 242931_at    |             | 152   | 1269  | 8 | 0.005354131 |
| 203923_s_at  | CYBB        | 1 400 | 11662 | 8 | 0.003935433 |
| 213715_s_at  | FLJ46061    | 12    | 100   | 8 | 0.001964771 |
| 220088_at    | CSR1        | 1 107 | 9135  | 8 | 0.000418667 |
| 219569_s_at  | TMEM22      | 37    | 302   | 8 | 0.008202307 |
| 1553335_x_at | FLJ34047    | 3     | 25    | 8 | 0.001139366 |
| 209122_at    | ADFP        | 1 808 | 14885 | 8 | 0.000789183 |
| 239161_at    | FDX1        | 185   | 1515  | 8 | 0.00288785  |
| 38037_at     | DTR         | 84    | 685   | 8 | 0.009219002 |
| 200923_at    | LGALS3BP    | 775   | 6333  | 8 | 0.002809076 |
| 204447_at    | ProSAPIP1   | 51    | 412   | 8 | 0.00666504  |
| 230146_s_at  | FREQ        | 42    | 343   | 8 | 0.005160543 |
| 229256_at    | PGM2L1      | 114   | 930   | 8 | 0.000419704 |
| 204867_at    | GCHFR       | 597   | 4843  | 8 | 0.000418667 |
| 213455_at    | LOC92689    | 195   | 1564  | 8 | 0.000587025 |
| 205354_at    | GAMT        | 27    | 216   | 8 | 0.001535305 |
| 217507_at    | SLC11A1     | 23    | 183   | 8 | 0.009305374 |
| 205730_s_at  | ABLIM3      | 12    | 96    | 8 | 0.000399477 |
| 212339_at    | EPB41L1     | 73    | 584   | 8 | 0.003706491 |
| 203563_at    | AFAP        | 4     | 35    | 8 | 0.007032035 |
| 224009_x_at  | DHRS9       | 548   | 4357  | 8 | 0.009943016 |
| 224497_x_at  | DHRS10      | 134   | 1067  | 8 | 0.009865434 |
| 202341_s_at  | TRIM2       | 14    | 108   | 8 | 0.003788429 |
| 212664_at    | TUBB5       | 28    | 218   | 8 | 0.006427808 |
| 225847_at    | KIAA1363    | 950   | 7426  | 8 | 0.004941434 |
| 202973_x_at  | FAM13A1     | 393   | 3076  | 8 | 0.002080113 |
| 204043_at    | TCN2        | 369   | 2870  | 8 | 0.001238039 |
| 227019_at    |             | 26    | 202   | 8 | 0.005473071 |
| 226435_at    | PAPLN       | 147   | 1142  | 8 | 0.006865099 |
| 238542_at    | ULBP2       | 44    | 337   | 8 | 0.003914795 |
| 214469_at    | HIST1H2AE   | 14    | 107   | 8 | 0.009521351 |
| 224609_at    | CTL2        | 81    | 623   | 8 | 0.000702631 |
| 221003_s_at  | CAB39L      | 36    | 277   | 8 | 0.005785977 |
| 214708_at    | SNTB1       | 82    | 627   | 8 | 0.001220469 |
| 219944_at    | FLJ21069    | 218   | 1667  | 8 | 0.002587654 |
| 221748_s_at  | TNS         | 550   | 4194  | 8 | 0.003871219 |
| 207256_at    | MBL2        | 2     | 17    | 8 | 0.00197542  |
| 212071_s_at  | SPTBN1      | 184   | 1393  | 8 | 0.002927056 |
| 1554980_a_at | ATF3        | 197   | 1491  | 8 | 0.006589381 |
| 210942_s_at  | SIAT10      | 275   | 2061  | 8 | 0.001301147 |
| 219168_s_at  | ARHGAP8     | 41    | 309   | 7 | 0.005751523 |
| 223126_s_at  | C1orf21     | 44    | 329   | 7 | 0.002121339 |
| 211964_at    | COL4A2      | 38    | 283   | 7 | 0.00931462  |
| 212775_at    | KIAA0657    | 54    | 403   | 7 | 0.000702631 |
| 201295_s_at  | WSB1        | 105   | 778   | 7 | 0.005673066 |
| 211913_s_at  |             | 113   | 832   | 7 | 0.000904172 |
| 223253_at    | UCC1        | 549   | 4057  | 7 | 0.002077936 |
| 219369_s_at  | OTUB2       | 83    | 613   | 7 | 0.007005649 |
| 204146_at    | PIR51       | 133   | 983   | 7 | 0.003833083 |
| 212611_at    | DTX4        | 221   | 1630  | 7 | 0.000457356 |
| 205499_at    | SRPUL       | 13    | 93    | 7 | 0.000880882 |
| 1553785_at   | RASGEF1B    | 26    | 190   | 7 | 0.003848334 |

|              |           |       |       |   |             |
|--------------|-----------|-------|-------|---|-------------|
| 221061_at    | PKD2L1    | 146   | 1074  | 7 | 0.00288785  |
| 237759_at    | CD48      | 27    | 201   | 7 | 0.002002609 |
| 215342_s_at  | HHL       | 68    | 498   | 7 | 0.001408079 |
| 220643_s_at  | FAIM      | 207   | 1516  | 7 | 0.002915127 |
| 211828_s_at  | TNIK      | 52    | 381   | 7 | 0.004270136 |
| 211304_x_at  | KCNJ5     | 43    | 314   | 7 | 0.000585182 |
| 35846_at     | THRA      | 44    | 324   | 7 | 0.007724328 |
| 228557_at    | FLJ35936  | 48    | 351   | 7 | 0.001948361 |
| 224707_at    | ORF1-FL49 | 2 068 | 14959 | 7 | 0.00098343  |
| 228285_at    | TDRD9     | 175   | 1260  | 7 | 0.002082798 |
| 206099_at    | PRKCH     | 28    | 200   | 7 | 0.00439484  |
| 213112_s_at  | SQSTM1    | 136   | 980   | 7 | 0.001303931 |
| 1561880_a_at |           | 23    | 164   | 7 | 0.009946816 |
| 1557621_at   | LOC375616 | 52    | 370   | 7 | 0.009001202 |
| 239246_at    | FARP1     | 48    | 341   | 7 | 0.001196518 |
| 202587_s_at  | AK1       | 145   | 1030  | 7 | 0.001068612 |
| 239122_at    | IL24      | 106   | 746   | 7 | 0.000399477 |
| 211005_at    | LAT       | 153   | 1076  | 7 | 0.001259428 |
| 219344_at    | SLC29A3   | 861   | 6069  | 7 | 0.002111779 |
| 201059_at    | EMS1      | 241   | 1689  | 7 | 0.000968666 |
| 228910_at    | KAI1      | 68    | 479   | 7 | 0.000205996 |
| 242358_at    |           | 21    | 147   | 7 | 0.005839976 |
| 237075_at    |           | 38    | 267   | 7 | 0.008767954 |
| 1555416_a_at | ALOX15B   | 63    | 439   | 7 | 0.00499179  |
| 233176_at    |           | 220   | 1529  | 7 | 0.000904172 |
| 226188_at    | HSPC159   | 235   | 1634  | 7 | 0.003940512 |
| 217936_at    | ARHGAP5   | 80    | 556   | 7 | 0.000611145 |
| 204779_s_at  | HOXB7     | 38    | 260   | 7 | 0.003696189 |
| 217975_at    | LOC51186  | 949   | 6551  | 7 | 0.003304223 |
| 223059_s_at  | C10orf45  | 638   | 4397  | 7 | 0.000178367 |
| 212956_at    | KIAA0882  | 770   | 5288  | 7 | 0.000587025 |
| 217047_s_at  | FAM13A1   | 250   | 1714  | 7 | 0.005059393 |
| 226438_at    | SNTB1     | 338   | 2292  | 7 | 0.000705723 |
| 218099_at    | HT008     | 742   | 5003  | 7 | 0.00068589  |
| 204663_at    | ME3       | 121   | 817   | 7 | 0.00098343  |
| 215411_s_at  | C6orf4    | 80    | 539   | 7 | 0.008684952 |
| 223113_at    | HSPC196   | 1 721 | 11547 | 7 | 0.0000724   |
| 1552474_a_at | GAMT      | 44    | 292   | 7 | 0.006255972 |
| 1560007_at   |           | 100   | 667   | 7 | 0.007912237 |
| 210152_at    | LILRB4    | 718   | 4789  | 7 | 0.003274724 |
| 219494_at    | RAD54B    | 25    | 168   | 7 | 0.00261607  |
| 228949_at    | FLJ23091  | 215   | 1421  | 7 | 0.003008986 |
| 1569110_x_at | PDCC6     | 475   | 3144  | 7 | 0.003198796 |
| 205934_at    | PLCL1     | 270   | 1788  | 7 | 0.004616654 |
| 219509_at    | MYOZ1     | 66    | 438   | 7 | 0.002704743 |
| 202464_s_at  | PFKFB3    | 872   | 5762  | 7 | 0.000419253 |
| 230741_at    |           | 855   | 5646  | 7 | 0.00148951  |
| 212912_at    | RPS6KA2   | 420   | 2769  | 7 | 0.00021992  |
| 230976_at    | C9orf98   | 99    | 650   | 7 | 0.003861327 |
| 218644_at    | PLEK2     | 74    | 483   | 7 | 0.007907506 |
| 226944_at    | HTRA3     | 29    | 190   | 7 | 0.006806474 |
| 203820_s_at  | IMP-3     | 93    | 604   | 7 | 0.000880882 |
| 235911_at    |           | 252   | 1633  | 6 | 0.004242416 |
| 1553043_a_at | NKIR      | 727   | 4692  | 6 | 0.006255972 |
| 218694_at    | ARMCX1    | 557   | 3592  | 6 | 0.001606431 |
| 213870_at    | COL11A2   | 23    | 151   | 6 | 0.005549172 |
| 214033_at    | ABCC6     | 80    | 514   | 6 | 0.003533806 |
| 207705_s_at  | KIAA0980  | 114   | 732   | 6 | 0.00068589  |
| 214927_at    | ITGBL1    | 36    | 227   | 6 | 0.003045581 |
| 212761_at    | TCF7L2    | 189   | 1194  | 6 | 0.004351755 |
| 233935_at    |           | 48    | 300   | 6 | 0.009557274 |
| 225589_at    | SH3MD2    | 95    | 597   | 6 | 0.000948343 |
| 212314_at    | KIAA0746  | 597   | 3753  | 6 | 0.008490797 |
| 213058_at    |           | 122   | 766   | 6 | 0.0000724   |
| 232628_at    |           | 70    | 440   | 6 | 0.006406917 |
| 201005_at    | CD9       | 3 781 | 23428 | 6 | 0.00048043  |
| 234929_s_at  | SPATA7    | 75    | 465   | 6 | 0.00330048  |
| 229337_at    | USP2      | 140   | 866   | 6 | 0.006477234 |
| 228713_s_at  | DHRS10    | 201   | 1238  | 6 | 0.002512934 |
| 218935_at    | EHD3      | 77    | 472   | 6 | 0.005776524 |
| 219326_s_at  | B3GNT1    | 490   | 3005  | 6 | 0.0044835   |
| 238524_at    | CEPT1     | 137   | 840   | 6 | 0.002949592 |
| 203922_s_at  | CYBB      | 503   | 3074  | 6 | 0.006940899 |
| 218856_at    | TNFRSF21  | 791   | 4828  | 6 | 0.00911437  |
| 203045_at    | NINJ1     | 1 412 | 8577  | 6 | 0.000769949 |
| 203657_s_at  | CTSF      | 138   | 838   | 6 | 0.003320768 |
| 232059_at    | DSCAML1   | 7     | 39    | 6 | 0.001407451 |
| 208820_at    | PTK2      | 233   | 1407  | 6 | 0.004283294 |
| 202112_at    | VWF       | 47    | 286   | 6 | 0.005612312 |
| 221756_at    | LIMK2     | 582   | 3502  | 6 | 0.000304262 |
| 1563745_a_at | LOC283050 | 205   | 1235  | 6 | 0.004220445 |
| 1563445_x_at | CTSL      | 215   | 1294  | 6 | 0.004100618 |
| 222173_s_at  | TBC1D2    | 418   | 2512  | 6 | 0.002449827 |

|              |           |       |       |   |             |
|--------------|-----------|-------|-------|---|-------------|
| 1559105_at   | LOC152084 | 6     | 36    | 6 | 0.002794001 |
| 204058_at    | ME1       | 1 119 | 6646  | 6 | 0.001393737 |
| 212958_x_at  | PAM       | 728   | 4319  | 6 | 0.007871904 |
| 201141_at    | GNPMB     | 9 893 | 58386 | 6 | 0.008901223 |
| 223278_at    | GJB2      | 125   | 736   | 6 | 0.006540479 |
| 209108_at    | TM4SF6    | 43    | 248   | 6 | 0.00159073  |
| 228935_at    | LOC283400 | 66    | 386   | 6 | 0.006519674 |
| 235678_at    | GM2A      | 3 285 | 18962 | 6 | 0.008308494 |
| 201743_at    | CD14      | 3 818 | 22026 | 6 | 0.002809076 |
| 207843_x_at  | CYB5      | 1 058 | 6094  | 6 | 0.000702631 |
| 214455_at    | HIST1H2BC | 38    | 218   | 6 | 0.002669574 |
| 226932_at    | SSPN      | 19    | 111   | 6 | 0.008253096 |
| 210242_x_at  | MTHFS     | 195   | 1118  | 6 | 0.004241432 |
| 202934_at    | HK2       | 1 367 | 7825  | 6 | 0.006032223 |
| 211530_x_at  | HLA-G     | 4 447 | 25441 | 6 | 0.002183623 |
| 230233_at    | RASGEF1B  | 528   | 3020  | 6 | 0.004596465 |
| 230645_at    | FRMD3     | 73    | 417   | 6 | 0.009127021 |
| 228950_s_at  | FLJ23091  | 129   | 730   | 6 | 0.001530192 |
| 241396_at    | NEDD4L    | 19    | 106   | 6 | 0.006260596 |
| 1559867_at   |           | 78    | 440   | 6 | 0.006421072 |
| 209831_x_at  | DNASE2    | 794   | 4471  | 6 | 0.001800907 |
| 1563112_at   |           | 10    | 58    | 6 | 0.009982407 |
| 202976_s_at  | RHOBTB3   | 122   | 689   | 6 | 0.00068589  |
| 227379_at    | OACT1     | 285   | 1601  | 6 | 0.005221138 |
| 210372_s_at  | TPD52L1   | 33    | 187   | 6 | 0.007360483 |
| 236075_s_at  |           | 136   | 759   | 6 | 0.005422126 |
| 221958_s_at  | FLJ23091  | 172   | 957   | 6 | 0.007261861 |
| 222870_s_at  | B3GNT1    | 1 193 | 6625  | 6 | 0.000960574 |
| 206454_s_at  | RHO       | 23    | 128   | 6 | 0.00743544  |
| 219622_at    | RAB20     | 945   | 5235  | 6 | 0.006529795 |
| 204995_at    | CDK5R1    | 32    | 179   | 6 | 0.007488115 |
| 202073_at    | OPTN      | 439   | 2426  | 6 | 0.001395906 |
| 223249_at    | CLDN12    | 182   | 1001  | 6 | 0.001214958 |
| 221011_s_at  | LBH       | 54    | 298   | 5 | 0.001829775 |
| 47069_at     | ARHGAP8   | 104   | 568   | 5 | 0.000705723 |
| 201050_at    | PLD3      | 3 941 | 21463 | 5 | 0.003592879 |
| 1552627_a_at | ARHGAP5   | 52    | 282   | 5 | 0.002810364 |
| 218764_at    | PRKCH     | 111   | 603   | 5 | 0.000933232 |
| 208891_at    | DUSP6     | 1 122 | 6072  | 5 | 0.000904172 |
| 235704_at    | LOC57228  | 10    | 54    | 5 | 0.003261351 |
| 224789_at    | KIAA1892  | 397   | 2135  | 5 | 0.003533478 |
| 224461_s_at  | AMID      | 302   | 1615  | 5 | 0.006589381 |
| 203433_at    | MTHFS     | 178   | 945   | 5 | 0.000742749 |
| 226722_at    | FAM20C    | 1 012 | 5383  | 5 | 0.004050464 |
| 233020_at    |           | 70    | 371   | 5 | 0.004242416 |
| 203708_at    | PDE4B     | 100   | 532   | 5 | 0.004760263 |
| 225202_at    | RHOBTB3   | 251   | 1327  | 5 | 0.001393737 |
| 229450_at    | IFIT4     | 370   | 1960  | 5 | 0.002609255 |
| 200785_s_at  | LRP1      | 463   | 2436  | 5 | 0.005222328 |
| 1557080_s_at | ITGBL1    | 59    | 311   | 5 | 0.00098343  |
| 209611_s_at  | SLC1A4    | 117   | 615   | 5 | 0.007264401 |
| 232687_at    |           | 230   | 1200  | 5 | 0.005695272 |
| 235756_at    |           | 72    | 373   | 5 | 0.004940456 |
| 226607_at    | C20orf194 | 1 357 | 7028  | 5 | 0.002105289 |
| 218404_at    | SNX10     | 2 470 | 12792 | 5 | 0.000702631 |
| 209288_s_at  | CDC42EP3  | 413   | 2134  | 5 | 0.003655871 |
| 228551_at    | MGC24039  | 84    | 431   | 5 | 0.001191628 |
| 227182_at    | SUSD3     | 57    | 294   | 5 | 0.00777778  |
| 1553432_s_at | OTOA      | 131   | 673   | 5 | 0.005212682 |
| 201578_at    | PODXL     | 187   | 955   | 5 | 0.002147148 |
| 221757_at    | LIMK2     | 445   | 2260  | 5 | 0.000769949 |
| 209610_s_at  | SLC1A4    | 650   | 3298  | 5 | 0.00336594  |
| 226425_at    | FLJ21069  | 1 738 | 8781  | 5 | 0.001589136 |
| 222877_at    | NRP2      | 983   | 4966  | 5 | 0.001784098 |
| 213005_s_at  | ANKRD15   | 110   | 555   | 5 | 0.004832907 |
| 235273_at    | DYX1C1    | 39    | 195   | 5 | 0.003899225 |
| 209236_at    | SLC23A2   | 459   | 2308  | 5 | 0.002704743 |
| 203560_at    | GGH       | 208   | 1045  | 5 | 0.00183191  |
| 216841_s_at  | SOD2      | 773   | 3882  | 5 | 0.001196518 |
| 206295_at    | IL18      | 270   | 1355  | 5 | 0.000432686 |
| 202554_s_at  | GSTM3     | 506   | 2536  | 5 | 0.00743544  |
| 203723_at    | ITPKB     | 384   | 1921  | 5 | 0.003261351 |
| 207104_x_at  | LILRB1    | 852   | 4249  | 5 | 0.00573141  |
| 1554703_at   | ARHGEF10  | 11    | 56    | 5 | 0.005549172 |
| 204906_at    | RPS6KA2   | 260   | 1292  | 5 | 0.000253775 |
| 215726_s_at  | CYB5      | 1 052 | 5226  | 5 | 0.000702631 |
| 212185_x_at  | MT2A      | 1 039 | 5148  | 5 | 0.009877341 |
| 221563_at    | DUSP10    | 244   | 1207  | 5 | 0.00366123  |
| 235306_at    | hiAN6     | 374   | 1841  | 5 | 0.006366323 |
| 227195_at    | ZNF503    | 96    | 472   | 5 | 0.003380629 |
| 211572_s_at  | SLC23A2   | 136   | 666   | 5 | 0.002198662 |
| 240440_at    | NPL       | 701   | 3425  | 5 | 0.002809076 |
| 214211_at    | FTH1      | 7 635 | 37196 | 5 | 0.000926018 |

|              |                |       |       |   |             |
|--------------|----------------|-------|-------|---|-------------|
| 208892_s_at  | DUSP6          | 993   | 4830  | 5 | 0.001445476 |
| 201125_s_at  | ITGB5          | 1 181 | 5741  | 5 | 0.000702631 |
| 221556_at    | CDC14B         | 43    | 209   | 5 | 0.004832781 |
| 213392_at    | MGC35048       | 119   | 575   | 5 | 0.003584476 |
| 233177_s_at  | MR-1           | 433   | 2090  | 5 | 0.000880882 |
| 227560_at    | SFXN2          | 241   | 1164  | 5 | 0.009115971 |
| 220917_s_at  | PWDMP          | 159   | 768   | 5 | 0.007907549 |
| 231835_at    | MGC26818       | 919   | 4424  | 5 | 0.000178367 |
| 221085_at    | TNFSF15        | 35    | 169   | 5 | 0.002843436 |
| 230740_at    | EHD3           | 67    | 324   | 5 | 0.006905313 |
| 228497_at    | SLC22A15       | 205   | 982   | 5 | 0.002105289 |
| 202074_s_at  | OPTN           | 616   | 2952  | 5 | 0.000684189 |
| 228121_at    | TGFB2          | 50    | 238   | 5 | 0.004121848 |
| 226025_at    | ANKRD28        | 381   | 1813  | 5 | 0.00068589  |
| 229504_at    | RAB23          | 146   | 696   | 5 | 0.000467534 |
| 219750_at    | FUJ11155       | 117   | 557   | 5 | 0.008666091 |
| 223276_at    | NID67          | 977   | 4623  | 5 | 0.000971539 |
| 228675_at    |                | 61    | 287   | 5 | 0.000424384 |
| 228550_at    | RTN4R          | 140   | 657   | 5 | 0.004159694 |
| 220955_x_at  | RAB23          | 54    | 254   | 5 | 0.0055326   |
| 238417_at    | PGM2L1         | 126   | 590   | 5 | 0.000719823 |
| 210058_at    | MAPK13         | 678   | 3153  | 5 | 0.007924808 |
| 216973_s_at  | HOXB7          | 68    | 312   | 5 | 0.003940512 |
| 219367_s_at  | NRP2           | 493   | 2265  | 5 | 0.001408079 |
| 235501_at    |                | 85    | 388   | 5 | 0.000705723 |
| 209589_s_at  | EPHB2          | 102   | 464   | 5 | 0.003144705 |
| 227863_at    | CTSD           | 88    | 402   | 5 | 0.003937148 |
| 201287_s_at  | SDC1           | 100   | 456   | 5 | 0.008326828 |
| 204661_at    | CDW52          | 7 184 | 32651 | 5 | 0.003584476 |
| 229553_at    | PGM2L1         | 175   | 794   | 5 | 0.000931488 |
| 214797_s_at  | PCTK3          | 77    | 347   | 5 | 0.00181793  |
| 40093_at     | LU             | 39    | 175   | 5 | 0.009852749 |
| 215111_s_at  | TGFB114        | 732   | 3293  | 4 | 0.000495535 |
| 207857_at    | LILRA2         | 496   | 2230  | 4 | 0.008429267 |
| 203558_at    | CUL7           | 57    | 254   | 4 | 0.008593928 |
| 241453_at    | PTK2           | 32    | 141   | 4 | 0.001858679 |
| 224759_s_at  | MGC17943       | 423   | 1895  | 4 | 0.002188081 |
| 213988_s_at  | SAT            | 6 858 | 30674 | 4 | 0.001688076 |
| 1555419_a_at | ASAH1          | 6 856 | 30427 | 4 | 0.005021424 |
| 210059_s_at  | MAPK13         | 469   | 2078  | 4 | 0.004242416 |
| 1556588_at   | LOC283687      | 145   | 639   | 4 | 0.00743544  |
| 204059_s_at  | ME1            | 2 542 | 11195 | 4 | 0.001541909 |
| 219109_at    | PF20           | 110   | 483   | 4 | 0.000242097 |
| 1554208_at   | MGC40042       | 169   | 741   | 4 | 0.009813144 |
| 209366_x_at  | CYB5           | 1 446 | 6321  | 4 | 0.001007985 |
| 222317_at    | PDE3B          | 163   | 713   | 4 | 0.007933253 |
| 1557455_s_at | MOSPD1         | 403   | 1752  | 4 | 0.00315082  |
| 205508_at    | SCN1B          | 117   | 508   | 4 | 0.008614824 |
| 235191_at    | LOC148189      | 77    | 336   | 4 | 0.006548664 |
| 212590_at    | RRAS2          | 41    | 177   | 4 | 0.007293101 |
| 226099_at    | ELL2           | 859   | 3709  | 4 | 0.003015853 |
| 1553402_a_at | HFE            | 49    | 212   | 4 | 0.002096506 |
| 212811_x_at  | SLC1A4         | 672   | 2891  | 4 | 0.002402393 |
| 229344_x_at  | KIAA1238       | 110   | 474   | 4 | 0.002333287 |
| 35820_at     | GM2A           | 8 511 | 36602 | 4 | 0.009001202 |
| 244322_at    |                | 15    | 64    | 4 | 0.00590369  |
| 1562415_a_at | FUJ25348       | 99    | 426   | 4 | 0.009443844 |
| 214582_at    | PDE3B          | 284   | 1220  | 4 | 0.004391112 |
| 204971_at    | CSTA           | 2 301 | 9851  | 4 | 0.004762464 |
| 204671_s_at  | ANKRD6         | 171   | 732   | 4 | 0.00261607  |
| 215146_s_at  | KIAA1043       | 101   | 432   | 4 | 0.001500924 |
| 227473_at    | EMS1           | 216   | 920   | 4 | 0.003655871 |
| 214875_x_at  | APLP2          | 2 786 | 11864 | 4 | 0.006150998 |
| 208010_s_at  | PTPN22         | 135   | 572   | 4 | 0.001678894 |
| 214130_s_at  | PDE4DIP        | 211   | 895   | 4 | 0.00267752  |
| 201647_s_at  | SCARB2         | 478   | 2031  | 4 | 0.005926796 |
| 1554508_at   | PIK3AP1        | 595   | 2523  | 4 | 0.005459729 |
| 219561_at    | COP22          | 153   | 649   | 4 | 0.009047592 |
| 242582_at    |                | 70    | 294   | 4 | 0.00148951  |
| 209917_s_at  | TP53AP1        | 174   | 732   | 4 | 0.002922856 |
| 221524_s_at  | RRAGD          | 3 367 | 14126 | 4 | 0.005473071 |
| 207332_s_at  | TFRC           | 7 853 | 32949 | 4 | 0.000831841 |
| 219677_at    | SSB1           | 267   | 1116  | 4 | 0.002077936 |
| 218445_at    | H2AFY2         | 93    | 386   | 4 | 0.005460784 |
| 202605_at    | GUSB           | 3 957 | 16457 | 4 | 0.001796904 |
| 228354_at    | C10orf83       | 64    | 267   | 4 | 0.001535305 |
| 225633_at    | LOC147991      | 216   | 893   | 4 | 0.000923481 |
| 226697_at    | LOC92689       | 72    | 299   | 4 | 0.006548664 |
| 204160_s_at  | ENPP4          | 355   | 1466  | 4 | 0.00174584  |
| 220009_at    | RNF127         | 120   | 495   | 4 | 0.00517546  |
| 218853_s_at  | MOSPD1         | 1 112 | 4583  | 4 | 0.00288785  |
| 239896_at    |                | 83    | 340   | 4 | 0.002220231 |
| 226822_at    | DKFZp762K22 71 |       | 292   | 4 | 0.00701067  |



|              |             |       |       |   |             |
|--------------|-------------|-------|-------|---|-------------|
| 212372_at    | MYH10       | 99    | 408   | 4 | 0.003478975 |
| 214975_s_at  | MTMR1       | 195   | 801   | 4 | 0.004050464 |
| 242710_at    |             | 230   | 942   | 4 | 0.00322619  |
| 218033_s_at  | SNN         | 148   | 606   | 4 | 0.00478907  |
| 211404_s_at  | APLP2       | 4 878 | 19940 | 4 | 0.00288785  |
| 230364_at    | CHPT1       | 200   | 818   | 4 | 0.001191628 |
| 207545_s_at  | NUMB        | 643   | 2624  | 4 | 0.000983556 |
| 216944_s_at  | ITPR1       | 348   | 1416  | 4 | 0.003554328 |
| 204088_at    | P2RX4       | 754   | 3060  | 4 | 0.002693687 |
| 212509_s_at  | FLJ46603    | 342   | 1386  | 4 | 0.003313997 |
| 220675_s_at  | C22orf20    | 45    | 182   | 4 | 0.001234206 |
| 228193_s_at  | RGC32       | 68    | 275   | 4 | 0.00769406  |
| 200973_s_at  | TM4SF8      | 1 293 | 5219  | 4 | 0.003761315 |
| 218032_at    | SNN         | 1 325 | 5341  | 4 | 0.004149745 |
| 236717_at    | LOC165186   | 101   | 405   | 4 | 0.006814616 |
| 1558342_x_at | DIXDC1      | 24    | 98    | 4 | 0.004413584 |
| 203504_s_at  | ABCA1       | 1 258 | 5053  | 4 | 0.000904172 |
| 206245_s_at  | IVNS1ABP    | 3 797 | 15232 | 4 | 0.006366323 |
| 229070_at    | C6orf105    | 85    | 340   | 4 | 0.005044173 |
| 207275_s_at  | ACSL1       | 1 368 | 5473  | 4 | 0.001342889 |
| 226751_at    | DKFZP566K19 | 696   | 2780  | 4 | 0.003833083 |
| 223463_at    | RAB23       | 237   | 947   | 4 | 0.006567773 |
| 205067_at    | IL1B        | 212   | 845   | 4 | 0.006980999 |
| 231993_at    |             | 31    | 125   | 4 | 0.001408079 |
| 219901_at    | FGD6        | 165   | 653   | 4 | 0.006826238 |
| 213035_at    | ANKRD28     | 102   | 406   | 4 | 0.002430641 |
| 203710_at    | ITPR1       | 597   | 2366  | 4 | 0.005642256 |
| 224952_at    | DKFZP564D16 | 158   | 626   | 4 | 0.003302552 |
| 213103_at    | STARD13     | 114   | 450   | 4 | 0.006865099 |
| 206060_s_at  | PTPN22      | 469   | 1850  | 4 | 0.006255972 |
| 204647_at    | HOMER3      | 360   | 1417  | 4 | 0.006466231 |
| 212607_at    | AKT3        | 282   | 1110  | 4 | 0.009048869 |
| 201243_s_at  | ATP1B1      | 2 178 | 8567  | 4 | 0.002949592 |
| 212390_at    | PDE4DIP     | 636   | 2501  | 4 | 0.00487626  |
| 225021_at    | ZNF532      | 71    | 280   | 4 | 0.006558766 |
| 215071_s_at  | HIST1H2AC   | 872   | 3419  | 4 | 0.00444683  |
| 217371_s_at  | IL15        | 75    | 294   | 4 | 0.007360483 |
| 34210_at     | CDWS2       | 7 641 | 29905 | 4 | 0.006355297 |
| 221210_s_at  | NPL         | 4 273 | 16698 | 4 | 0.005240438 |
| 48106_at     | FLJ20489    | 1 325 | 5175  | 4 | 0.003415353 |
| 213113_s_at  | SLC43A3     | 661   | 2580  | 4 | 0.007907506 |
| 1552637_at   | PTPN11      | 12    | 47    | 4 | 0.001544668 |
| 228799_at    |             | 265   | 1031  | 4 | 0.000971539 |
| 212715_s_at  | KIAA0819    | 76    | 296   | 4 | 0.004162588 |
| 212810_s_at  | SLC1A4      | 319   | 1238  | 4 | 0.002704743 |
| 209073_s_at  | NUMB        | 1 223 | 4743  | 4 | 0.000457356 |
| 204565_at    | THEM2       | 1 913 | 7377  | 4 | 0.000680986 |
| 203367_at    | DUSP14      | 390   | 1502  | 4 | 0.000880882 |
| 202011_at    | TJP1        | 161   | 620   | 4 | 0.006905313 |
| 229815_at    |             | 79    | 303   | 4 | 0.001243417 |
| 221246_x_at  | TNS         | 275   | 1052  | 4 | 0.005221138 |
| 230722_at    | BNC2        | 55    | 211   | 4 | 0.005035395 |
| 202923_s_at  | GCLC        | 2 145 | 8189  | 4 | 0.006957875 |
| 203020_at    | HHL         | 490   | 1855  | 4 | 0.005221138 |
| 208771_s_at  | LTA4H       | 4 728 | 17889 | 4 | 0.000684189 |
| 209264_s_at  | TM4SF7      | 952   | 3599  | 4 | 0.004957623 |
| 204173_at    | MLC1SA      | 306   | 1158  | 4 | 0.001784098 |
| 227904_at    | AZ2         | 189   | 714   | 4 | 0.000611018 |
| 224444_s_at  | MGC14801    | 167   | 631   | 4 | 0.004288856 |
| 223405_at    | NPL         | 3 774 | 14203 | 4 | 0.007725497 |
| 205618_at    | PRRG1       | 123   | 461   | 4 | 0.002559332 |
| 225314_at    | MGC45416    | 114   | 428   | 4 | 0.002633313 |
| 209321_s_at  | ADCY3       | 652   | 2442  | 4 | 0.001205147 |
| 1554586_a_at | RHOBTB2     | 126   | 472   | 4 | 0.00105159  |
| 223636_at    | ZMYND12     | 84    | 314   | 4 | 0.007581555 |
| 213388_at    |             | 211   | 787   | 4 | 0.009410461 |
| 203505_at    | ABCA1       | 1 965 | 7339  | 4 | 0.000816709 |
| 1555275_a_at | KLHL6       | 168   | 627   | 4 | 0.001483623 |
| 221675_s_at  | CHPT1       | 1 600 | 5964  | 4 | 0.00068589  |
| 210074_at    | CTSL2       | 204   | 757   | 4 | 0.007093622 |
| 203282_at    | GBE1        | 1 597 | 5926  | 4 | 0.001393737 |
| 219202_at    | FLJ22341    | 296   | 1093  | 4 | 0.002568779 |
| 218773_s_at  | MSRB        | 716   | 2648  | 4 | 0.001269936 |
| 235740_at    | FLJ22344    | 323   | 1192  | 4 | 0.003313997 |
| 208837_at    | P24B        | 868   | 3191  | 4 | 0.004926774 |
| 232463_at    | LOC283981   | 68    | 249   | 4 | 0.00227813  |
| 203986_at    | GENX-3414   | 78    | 286   | 4 | 0.004209232 |
| 209206_at    | SEC22L1     | 1 132 | 4161  | 4 | 0.002474415 |
| 205992_s_at  | IL15        | 235   | 862   | 4 | 0.004616654 |
| 226185_at    | CDS1        | 168   | 616   | 4 | 0.004883776 |
| 224968_at    | MGC15407    | 336   | 1229  | 4 | 0.005240438 |
| 235466_s_at  |             | 122   | 445   | 4 | 0.007005649 |
| 211336_x_at  | LILRB1      | 1 065 | 3877  | 4 | 0.00843329  |

|             |          |        |       |   |             |
|-------------|----------|--------|-------|---|-------------|
| 213624_at   | SMPDL3A  | 1 101  | 4006  | 4 | 0.006255972 |
| 201850_at   | CAPG     | 7 347  | 26699 | 4 | 0.006003964 |
| 225685_at   |          | 308    | 1119  | 4 | 0.002157051 |
| 215501_s_at | DUSP10   | 213    | 771   | 4 | 0.005798618 |
| 227001_at   | FLJ13955 | 1 234  | 4457  | 4 | 0.003198796 |
| 206335_at   | GALNS    | 988    | 3562  | 4 | 0.009092042 |
| 203865_s_at | ADARB1   | 107    | 386   | 4 | 0.002794001 |
| 208702_x_at | APLP2    | 4 697  | 16882 | 4 | 0.002389499 |
| 218634_at   | PHLDA3   | 294    | 1054  | 4 | 0.006063804 |
| 228972_at   |          | 84     | 302   | 4 | 0.003571311 |
| 203167_at   | TIMP2    | 1 914  | 6868  | 4 | 0.00480213  |
| 225915_at   | CAB39L   | 369    | 1324  | 4 | 0.002574551 |
| 223596_at   | SLC12A6  | 215    | 769   | 4 | 0.006180927 |
| 221477_s_at | MGC5618  | 1 847  | 6605  | 4 | 0.000831841 |
| 201825_s_at | CGI-49   | 622    | 2223  | 4 | 0.00148951  |
| 203971_at   | SLC31A1  | 1 146  | 4098  | 4 | 0.009417062 |
| 204161_s_at | ENPP4    | 118    | 421   | 4 | 0.002265029 |
| 212957_s_at | LOC92249 | 97     | 347   | 4 | 0.009410461 |
| 207131_x_at | GGT1     | 250    | 892   | 4 | 0.004283294 |
| 211302_s_at | PDE4B    | 74     | 264   | 4 | 0.002810364 |
| 215489_x_at | HOMER3   | 276    | 982   | 4 | 0.003871918 |
| 214553_s_at | ARPP-19  | 659    | 2340  | 4 | 0.002157843 |
| 236660_at   |          | 119    | 424   | 4 | 0.00701067  |
| 209537_at   | EXTL2    | 288    | 1021  | 4 | 0.002854658 |
| 201363_s_at | IVNS1ABP | 1 782  | 6315  | 4 | 0.006872675 |
| 203591_s_at | CSF3R    | 215    | 761   | 4 | 0.001813951 |
| 236539_at   | PTPN22   | 357    | 1264  | 4 | 0.002080113 |
| 219257_s_at | SPHK1    | 189    | 668   | 4 | 0.0014003   |
| 209794_at   | SRGAP2   | 82     | 290   | 4 | 0.003028251 |
| 208950_s_at | ALDH7A1  | 304    | 1075  | 4 | 0.00319285  |
| 221256_s_at | C9orf158 | 160    | 565   | 4 | 0.003731949 |
| 226075_at   | SSB1     | 260    | 916   | 4 | 0.003198796 |
| 214521_at   | HES2     | 44     | 154   | 4 | 0.007360483 |
| 235754_at   | HFE      | 186    | 653   | 4 | 0.007900978 |
| 203702_s_at | TLL4     | 277    | 972   | 4 | 0.00329417  |
| 228167_at   | KLHL6    | 994    | 3479  | 3 | 0.002492413 |
| 202975_s_at | RHOBTB3  | 174    | 607   | 3 | 0.002969263 |
| 230174_at   | LYPLAL1  | 616    | 2149  | 3 | 0.0055326   |
| 223000_s_at | F11R     | 3 869  | 13463 | 3 | 0.005776524 |
| 207375_s_at | IL15RA   | 198    | 687   | 3 | 0.003663759 |
| 208498_s_at | AMY2B    | 154    | 534   | 3 | 0.001922823 |
| 221523_s_at | RRAGD    | 1 087  | 3762  | 3 | 0.007078781 |
| 225759_x_at | CLMN     | 96     | 333   | 3 | 0.006440407 |
| 38918_at    | SOX13    | 76     | 262   | 3 | 0.002086809 |
| 223465_at   | COL4A3BP | 671    | 2315  | 3 | 0.00227788  |
| 238778_at   | MPP7     | 45     | 154   | 3 | 0.008138386 |
| 201362_at   | IVNS1ABP | 2 569  | 8849  | 3 | 0.005740279 |
| 229845_at   | MAPKAP1  | 177    | 608   | 3 | 0.000789183 |
| 214285_at   | FABP3    | 588    | 2021  | 3 | 0.007613028 |
| 200972_at   | TM4SF8   | 3 085  | 10597 | 3 | 0.003618121 |
| 223741_s_at | TTYH2    | 1 228  | 4210  | 3 | 0.003626433 |
| 201963_at   | ACSL1    | 2 785  | 9535  | 3 | 0.002147148 |
| 201242_s_at | ATP1B1   | 3 793  | 12985 | 3 | 0.001196518 |
| 202391_at   | BASP1    | 3 207  | 10952 | 3 | 0.001704413 |
| 54632_at    | THADA    | 439    | 1498  | 3 | 0.001191628 |
| 201646_at   | SCARB2   | 1 165  | 3971  | 3 | 0.004702542 |
| 203860_at   | PCCA     | 193    | 658   | 3 | 0.006255972 |
| 208691_at   | TFRC     | 12 488 | 42571 | 3 | 0.00179248  |
| 212558_at   | SPRY1    | 61     | 208   | 3 | 0.007119827 |
| 231472_at   | FBXO15   | 63     | 216   | 3 | 0.007926785 |
| 238075_at   |          | 127    | 431   | 3 | 0.002794001 |
| 226728_at   | SLC27A1  | 863    | 2923  | 3 | 0.003121689 |
| 225689_at   | FLJ14566 | 251    | 850   | 3 | 0.003021064 |
| 204466_s_at | SNCA     | 419    | 1409  | 3 | 0.006980999 |
| 226771_at   | ATP8B2   | 41     | 137   | 3 | 0.001719313 |
| 206483_at   | TSLRP    | 126    | 423   | 3 | 0.008218643 |
| 206087_x_at | HFE      | 519    | 1739  | 3 | 0.007010655 |
| 207071_s_at | ACO1     | 1 410  | 4718  | 3 | 0.001205147 |
| 218285_s_at | DHRS6    | 873    | 2917  | 3 | 0.007139148 |
| 208591_s_at | PDE3B    | 156    | 519   | 3 | 0.006010837 |
| 217853_at   | TENS1    | 3 605  | 12017 | 3 | 0.002922856 |
| 218950_at   | ARAP3    | 181    | 603   | 3 | 0.009127127 |
| 227669_at   |          | 260    | 864   | 3 | 0.00387494  |
| 219017_at   | EK11     | 1 209  | 4013  | 3 | 0.003949575 |
| 221482_s_at | ARPP-19  | 2 051  | 6789  | 3 | 0.00168032  |
| 208748_s_at | FLOT1    | 150    | 498   | 3 | 0.007500606 |
| 218673_s_at | APG7L    | 587    | 1942  | 3 | 0.005925175 |
| 219687_at   | MART2    | 83     | 275   | 3 | 0.001196518 |
| 205006_s_at | NMT2     | 208    | 686   | 3 | 0.004283294 |
| 228152_s_at | FLJ31033 | 675    | 2217  | 3 | 0.001570183 |
| 200629_at   | WARS     | 3 049  | 10007 | 3 | 0.002105289 |
| 202922_at   | GCLC     | 1 062  | 3474  | 3 | 0.003020336 |
| 219859_at   | CLECSF9  | 57     | 186   | 3 | 0.005463441 |

|              |             |        |       |   |             |
|--------------|-------------|--------|-------|---|-------------|
| 208653_s_at  | CD164       | 4 332  | 14087 | 3 | 0.004017383 |
| 218857_s_at  | ASRGL1      | 716    | 2327  | 3 | 0.002512863 |
| 224983_at    | SCARB2      | 3 970  | 12864 | 3 | 0.003708692 |
| 209263_x_at  | TM4SF7      | 1 721  | 5563  | 3 | 0.00743544  |
| 201826_s_at  | CGI-49      | 235    | 760   | 3 | 0.001986832 |
| 224473_x_at  | LZTS2       | 301    | 972   | 3 | 0.000611145 |
| 225970_at    | DDHD1       | 441    | 1424  | 3 | 0.004241432 |
| 223594_at    | DKFZp434K24 | 368    | 1188  | 3 | 0.008323176 |
| 242123_at    | MPRA        | 39     | 126   | 3 | 0.009852749 |
| 213246_at    | C14orf109   | 2 542  | 8186  | 3 | 0.004381983 |
| 225018_at    | SPIRE1      | 618    | 1988  | 3 | 0.000968666 |
| 221042_s_at  | CLMN        | 180    | 581   | 3 | 0.006529795 |
| 225263_at    | HS6ST1      | 445    | 1431  | 3 | 0.006026589 |
| 203675_at    | NUCB2       | 547    | 1756  | 3 | 0.004093992 |
| 1569940_at   | SLC6A16     | 58     | 185   | 3 | 0.005278446 |
| 238067_at    | FLJ20298    | 61     | 196   | 3 | 0.005776524 |
| 227112_at    | KIAA0779    | 593    | 1892  | 3 | 0.000611018 |
| 225825_at    | C20orf194   | 868    | 2766  | 3 | 0.002321655 |
| 212730_at    | DMN         | 28     | 90    | 3 | 0.008379074 |
| 217911_s_at  | BAG3        | 866    | 2739  | 3 | 0.002111779 |
| 238638_at    | SLC37A2     | 508    | 1595  | 3 | 0.002982382 |
| 233085_s_at  | FLJ22833    | 1 878  | 5901  | 3 | 0.007704778 |
| 226679_at    | SLC26A11    | 2 827  | 8877  | 3 | 0.008993374 |
| 201553_s_at  | LAMP1       | 13 291 | 41666 | 3 | 0.007841297 |
| 212552_at    | HPCAL1      | 4 120  | 12907 | 3 | 0.003320727 |
| 210980_s_at  | ASAH1       | 8 558  | 26788 | 3 | 0.007377097 |
| 222872_x_at  | FLJ22833    | 2 882  | 8996  | 3 | 0.006469697 |
| 221504_s_at  | ATP6V1H     | 3 012  | 9399  | 3 | 0.004908299 |
| 209919_x_at  | GGT1        | 291    | 909   | 3 | 0.006160639 |
| 239147_at    | DKFZp313G17 | 151    | 470   | 3 | 0.006355297 |
| 222262_s_at  | EK11        | 507    | 1575  | 3 | 0.002050574 |
| 1555736_a_at | AGTRAP      | 488    | 1515  | 3 | 0.000830582 |
| 221865_at    | C9orf91     | 274    | 849   | 3 | 0.002402393 |
| 209287_s_at  | CDC42EP3    | 168    | 517   | 3 | 0.002625793 |
| 210854_x_at  | SLC6A8      | 188    | 581   | 3 | 0.001075726 |
| 201750_s_at  | ECE1        | 74     | 228   | 3 | 0.009505497 |
| 218436_at    | SIL1        | 604    | 1861  | 3 | 0.004761857 |
| 218346_s_at  | SESN1       | 695    | 2137  | 3 | 0.00777778  |
| 213351_s_at  | KIAA0779    | 493    | 1507  | 3 | 0.000581828 |
| 1555881_s_at | LZTS2       | 359    | 1094  | 3 | 0.002716564 |
| 201124_at    | ITGB5       | 165    | 499   | 3 | 0.003290689 |
| 205351_at    | GGCX        | 390    | 1183  | 3 | 0.00769406  |
| 225914_s_at  | CAB39L      | 376    | 1141  | 3 | 0.00104948  |
| 1552497_a_at | SLAMF6      | 158    | 479   | 3 | 0.00261607  |
| 220173_at    | C14orf45    | 82     | 248   | 3 | 0.003986786 |
| 203259_s_at  | C6orf74     | 590    | 1786  | 3 | 0.001259428 |
| 208284_x_at  | GGT1        | 256    | 776   | 3 | 0.007880473 |
| 204683_at    | ICAM2       | 226    | 685   | 3 | 0.006443746 |
| 213902_at    | ASAH1       | 1 708  | 5120  | 3 | 0.003027398 |
| 213511_s_at  | MTMR1       | 1 778  | 5328  | 3 | 0.003592879 |
| 201427_s_at  | SEPP1       | 14 010 | 41982 | 3 | 0.006414788 |
| 225059_at    | AGTRAP      | 527    | 1576  | 3 | 0.001423712 |
| 200628_s_at  | WARS        | 1 637  | 4891  | 3 | 0.002035817 |
| 1554807_a_at | SPIRE1      | 365    | 1089  | 3 | 0.008946868 |
| 1553956_at   | ALS2CR4     | 99     | 297   | 3 | 0.002002304 |
| 209544_at    | RIPK2       | 168    | 501   | 3 | 0.008977086 |
| 221274_s_at  | LMAN2L      | 578    | 1721  | 3 | 0.001094852 |
| 1552671_a_at | SLC9A7      | 102    | 305   | 3 | 0.001998605 |
| 201911_s_at  | FARP1       | 811    | 2414  | 3 | 0.008108168 |
| 200623_s_at  | CALM3       | 676    | 2009  | 3 | 0.006826238 |
| 209383_at    | DDIT3       | 335    | 990   | 3 | 0.009717573 |
| 242584_at    | FLJ13305    | 55     | 163   | 3 | 0.002581975 |
| 203593_at    | CD2AP       | 389    | 1148  | 3 | 0.005523342 |
| 226120_at    | TTC8        | 468    | 1381  | 3 | 0.007488083 |
| 206277_at    | P2RY2       | 61     | 179   | 3 | 0.004159694 |
| 224097_s_at  | F11R        | 456    | 1343  | 3 | 0.002105289 |
| 203703_s_at  | TTL4        | 70     | 206   | 3 | 0.005070646 |
| 224025_s_at  | APG7L       | 540    | 1588  | 3 | 0.003783859 |
| 222315_at    |             | 118    | 347   | 3 | 0.007791728 |
| 206214_at    | PLA2G7      | 7 130  | 20948 | 3 | 0.008117819 |
| 230697_at    | BB55        | 68     | 199   | 3 | 0.003424721 |
| 209018_s_at  | PINK1       | 769    | 2258  | 3 | 0.00148951  |
| 225583_at    | UXS1        | 911    | 2671  | 3 | 0.003181706 |
| 214259_s_at  | AKR7A2      | 1 626  | 4757  | 3 | 0.003066467 |
| 208848_at    | ADH5        | 1 010  | 2950  | 3 | 0.002105289 |
| 208704_x_at  | APLP2       | 5 223  | 15230 | 3 | 0.00748934  |
| 212294_at    | GNG12       | 172    | 500   | 3 | 0.009417062 |
| 1554333_at   | DNAJA4      | 78     | 228   | 3 | 0.004148351 |
| 225622_at    | PAG         | 233    | 678   | 3 | 0.007841297 |
| 221606_s_at  | NSBP1       | 171    | 498   | 3 | 0.006208912 |
| 210651_s_at  | EPHB2       | 161    | 467   | 3 | 0.001381824 |
| 209632_at    | PPP2R3A     | 124    | 359   | 3 | 0.006589381 |
| 219675_s_at  | UXS1        | 663    | 1917  | 3 | 0.003424725 |

|              |               |       |       |   |             |
|--------------|---------------|-------|-------|---|-------------|
| 202427_s_at  | DKFZP564B16.2 | 171   | 6256  | 3 | 0.005160543 |
| 209777_s_at  | SLC19A1       | 90    | 260   | 3 | 0.007710279 |
| 226795_at    | CHDC1         | 768   | 2210  | 3 | 0.000706559 |
| 212637_s_at  | WWP1          | 693   | 1991  | 3 | 0.00967129  |
| 242283_at    | MGC27277      | 70    | 199   | 3 | 0.00480213  |
| 210087_s_at  | MPZL1         | 202   | 577   | 3 | 0.002854269 |
| 212522_at    | PDE8A         | 1151  | 3286  | 3 | 0.005926796 |
| 203272_s_at  | TUSC2         | 418   | 1193  | 3 | 0.004723243 |
| 214649_s_at  | MTMR2         | 232   | 661   | 3 | 0.003072129 |
| 228482_at    | FLJ36674      | 105   | 299   | 3 | 0.007139148 |
| 242963_at    | MGC26963      | 48    | 137   | 3 | 0.003526202 |
| 204057_at    | ICSBP1        | 1943  | 5516  | 3 | 0.009943016 |
| 228528_at    |               | 221   | 627   | 3 | 0.008544552 |
| 211417_x_at  | GGTLA4        | 329   | 930   | 3 | 0.008486317 |
| 208899_x_at  | ATP6V1D       | 4449  | 12581 | 3 | 0.007916679 |
| 218126_at    | FLJ10579      | 1007  | 2842  | 3 | 0.007032035 |
| 202147_s_at  | IFRD1         | 376   | 1059  | 3 | 0.003121689 |
| 213186_at    | DZIP3         | 266   | 747   | 3 | 0.002655519 |
| 214129_at    | PDE4DIP       | 874   | 2456  | 3 | 0.001259428 |
| 225536_at    | BCLP          | 55    | 156   | 3 | 0.007093622 |
| 224560_at    | TIMP2         | 4821  | 13549 | 3 | 0.00258183  |
| 221511_x_at  | CPR8          | 1299  | 3638  | 3 | 0.002082798 |
| 216095_x_at  | MTMR1         | 2102  | 5881  | 3 | 0.006024424 |
| 205771_s_at  | AKAP7         | 296   | 828   | 3 | 0.006497498 |
| 227354_at    | PAG           | 318   | 890   | 3 | 0.009605842 |
| 204918_s_at  | MLLT3         | 51    | 142   | 3 | 0.006656872 |
| 1557126_a_at | PLD1          | 56    | 156   | 3 | 0.007695121 |
| 205005_s_at  | NMT2          | 307   | 856   | 3 | 0.00590369  |
| 218417_s_at  | FLJ20489      | 989   | 2760  | 3 | 0.001205147 |
| 208703_s_at  | APLP2         | 2902  | 8070  | 3 | 0.006398586 |
| 218728_s_at  | HSPC163       | 1060  | 2947  | 3 | 0.004806273 |
| 207566_at    | MR1           | 172   | 477   | 3 | 0.002568779 |
| 212820_at    | RC3           | 3776  | 10468 | 3 | 0.006550021 |
| 205486_at    | TESK2         | 171   | 472   | 3 | 0.003021473 |
| 210288_at    | KLRG1         | 137   | 378   | 3 | 0.007005649 |
| 208763_s_at  | DSIP1         | 610   | 1681  | 3 | 0.004506497 |
| 210757_x_at  | DAB2          | 5349  | 14745 | 3 | 0.007488083 |
| 209406_at    | BAG2          | 212   | 583   | 3 | 0.002567713 |
| 223441_at    | SLC17A5       | 2453  | 6720  | 3 | 0.003205291 |
| 221005_s_at  | PTDSS2        | 126   | 346   | 3 | 0.006294694 |
| 212246_at    | MCFD2         | 798   | 2184  | 3 | 0.009748097 |
| 1555137_a_at | FGD6          | 131   | 357   | 3 | 0.007119827 |
| 205823_at    | RGS12         | 325   | 888   | 3 | 0.002512863 |
| 210592_s_at  | SAT           | 15355 | 41913 | 3 | 0.002351378 |
| 229402_at    | LOC148418     | 112   | 306   | 3 | 0.006769524 |
| 228437_at    | HSPC163       | 217   | 593   | 3 | 0.009156564 |
| 235012_at    | LRCH1         | 392   | 1067  | 3 | 0.002700264 |
| 216252_x_at  | TNFRSF6       | 206   | 559   | 3 | 0.00832761  |
| 207233_s_at  | MIFF          | 1335  | 3629  | 3 | 0.007717178 |
| 212853_at    | KIAA0276      | 121   | 328   | 3 | 0.006222489 |
| 223454_at    | CXCL16        | 2491  | 6750  | 3 | 0.009610964 |
| 210589_s_at  | GBA           | 1281  | 3461  | 3 | 0.005354131 |
| 213702_x_at  | ASAH1         | 15330 | 41401 | 3 | 0.006469697 |
| 224880_at    | RALA          | 3905  | 10522 | 3 | 0.004429748 |
| 205393_s_at  | CHEK1         | 76    | 206   | 3 | 0.008529668 |
| 235349_at    | FLJ32954      | 455   | 1219  | 3 | 0.006589381 |
| 219471_at    | C13orf18      | 305   | 818   | 3 | 0.009330174 |
| 209633_at    | PPP2R3A       | 331   | 886   | 3 | 0.009265972 |
| 48031_r_at   | C5orf4        | 195   | 521   | 3 | 0.004291214 |
| 225626_at    | PAG           | 490   | 1310  | 3 | 0.004673886 |
| 227983_at    | MGC7036       | 1260  | 3349  | 3 | 0.007841297 |
| 232898_at    | DAB2          | 524   | 1392  | 3 | 0.007918833 |
| 222156_x_at  | CPR8          | 831   | 2205  | 3 | 0.004829386 |
| 203042_at    | LAMP2         | 5816  | 15416 | 3 | 0.001688076 |
| 238992_at    |               | 101   | 268   | 3 | 0.007695121 |
| 209453_at    | SLC9A1        | 301   | 795   | 3 | 0.004298388 |
| 203336_s_at  | ITGB1BP1      | 2103  | 5559  | 3 | 0.003940512 |
| 227479_at    |               | 231   | 610   | 3 | 0.001990927 |
| 231732_at    | SMPD3         | 34    | 91    | 3 | 0.006550021 |
| 202501_at    | MAPRE2        | 1604  | 4226  | 3 | 0.001541909 |
| 201923_at    | PRDX4         | 3876  | 10192 | 3 | 0.000923481 |
| 209286_at    | CDC42EP3      | 245   | 643   | 3 | 0.003020336 |
| 223912_s_at  | CLN8          | 543   | 1425  | 3 | 0.002520101 |
| 226851_at    | LYPLAL1       | 1628  | 4269  | 3 | 0.009921527 |
| 204638_at    | ACP5          | 12439 | 32550 | 3 | 0.002077834 |
| 1559517_a_at | SPIRE1        | 149   | 390   | 3 | 0.00197542  |
| 201393_s_at  | IGF2R         | 5303  | 13861 | 3 | 0.002828704 |
| 227638_at    | KIAA1632      | 1010  | 2640  | 3 | 0.007752516 |
| 220948_s_at  | ATP1A1        | 2338  | 6107  | 3 | 0.009443844 |
| 213620_s_at  | ICAM2         | 392   | 1024  | 3 | 0.00777778  |
| 242697_at    | ZNF540        | 51    | 133   | 3 | 0.002111479 |
| 206081_at    | SLC24A1       | 186   | 483   | 3 | 0.006459494 |
| 206438_x_at  | FLJ12975      | 207   | 539   | 3 | 0.006157835 |

|              |             |        |       |   |             |
|--------------|-------------|--------|-------|---|-------------|
| 221041_s_at  | SLC17A5     | 1 085  | 2819  | 3 | 0.004832907 |
| 201279_s_at  | DAB2        | 5 312  | 13793 | 3 | 0.009707581 |
| 213349_at    | KIAA0779    | 487    | 1263  | 3 | 0.000957522 |
| 221957_at    | PDK3        | 379    | 982   | 3 | 0.007853053 |
| 218806_s_at  | VAV3        | 216    | 558   | 3 | 0.008732693 |
| 212862_at    | CDS2        | 1 443  | 3725  | 3 | 0.005902598 |
| 208626_s_at  | VAT1        | 3 262  | 8416  | 3 | 0.008544623 |
| 213475_s_at  | ITGAL       | 275    | 710   | 3 | 0.008666091 |
| 214021_x_at  | ITGB5       | 115    | 296   | 3 | 0.002198662 |
| 209207_s_at  | SEC22L1     | 925    | 2380  | 3 | 0.002828704 |
| 208918_s_at  | FLJ13052    | 2 309  | 5938  | 3 | 0.002767163 |
| 240095_at    |             | 120    | 308   | 3 | 0.006905313 |
| 219340_s_at  | CLN8        | 531    | 1364  | 3 | 0.006222489 |
| 201392_s_at  | IGF2R       | 1 706  | 4363  | 3 | 0.003144705 |
| 229743_at    | LOC220929   | 398    | 1019  | 3 | 0.009417062 |
| 205394_at    | CHEK1       | 132    | 335   | 3 | 0.00604506  |
| 223266_at    | ALS2CR2     | 1 505  | 3828  | 3 | 0.002970666 |
| 211794_at    | FYB         | 660    | 1672  | 3 | 0.007005649 |
| 208248_x_at  | APLP2       | 6 124  | 15523 | 3 | 0.005447401 |
| 205462_s_at  | HPCAL1      | 931    | 2359  | 3 | 0.008630216 |
| 213578_at    | BMPR1A      | 195    | 494   | 3 | 0.003221139 |
| 226277_at    | COL4A3BP    | 1 130  | 2861  | 3 | 0.009068663 |
| 201444_s_at  | ATP6AP2     | 8 509  | 21521 | 3 | 0.002854658 |
| 210886_x_at  | TP53AP1     | 404    | 1022  | 3 | 0.004267368 |
| 1558692_at   | MGC31963    | 427    | 1078  | 3 | 0.007880473 |
| 203041_s_at  | LAMP2       | 8 782  | 22122 | 3 | 0.001303931 |
| 225478_at    | MFHAS1      | 1 663  | 4184  | 3 | 0.008329752 |
| 235202_x_at  | IKIP        | 151    | 379   | 3 | 0.009423067 |
| 202472_at    | MPI         | 221    | 555   | 3 | 0.006255972 |
| 223478_at    | TIMM8B      | 500    | 1257  | 3 | 0.001731035 |
| 214866_at    | PLAUR       | 733    | 1833  | 2 | 0.002810364 |
| 226448_at    | MGC15887    | 181    | 452   | 2 | 0.009573434 |
| 222742_s_at  | RABL5       | 314    | 784   | 2 | 0.002096506 |
| 1553928_at   | MGC10084    | 602    | 1501  | 2 | 0.002200526 |
| 201720_s_at  | LAPTM5      | 12 216 | 30435 | 2 | 0.001361336 |
| 208898_at    | ATP6V1D     | 6 386  | 15909 | 2 | 0.007097634 |
| 235703_at    | PLB1        | 115    | 287   | 2 | 0.006877699 |
| 240467_at    |             | 30     | 74    | 2 | 0.00604506  |
| 218967_s_at  | PTER        | 747    | 1859  | 2 | 0.00699972  |
| 227266_s_at  | FYB         | 1 391  | 3446  | 2 | 0.005893898 |
| 219317_at    | POLI        | 253    | 626   | 2 | 0.006456426 |
| 228303_at    |             | 300    | 741   | 2 | 0.006174984 |
| 202266_at    | TTRAP       | 7 321  | 18038 | 2 | 0.002157051 |
| 202699_s_at  | KIAA0792    | 318    | 781   | 2 | 0.009982407 |
| 235352_at    |             | 1 675  | 4108  | 2 | 0.005785977 |
| 227840_at    | LOC130355   | 417    | 1021  | 2 | 0.008429267 |
| 208654_s_at  | CD164       | 8 086  | 19775 | 2 | 0.003462638 |
| 235696_at    |             | 301    | 733   | 2 | 0.009388055 |
| 203420_at    | FAM8A1      | 1 151  | 2801  | 2 | 0.003364116 |
| 217777_s_at  | HSPC121     | 760    | 1848  | 2 | 0.00197542  |
| 219625_s_at  | COL4A3BP    | 934    | 2268  | 2 | 0.004241432 |
| 218923_at    | CTBS        | 596    | 1443  | 2 | 0.002969263 |
| 211810_s_at  | GALC        | 263    | 634   | 2 | 0.003605117 |
| 205401_at    | AGPS        | 1 507  | 3631  | 2 | 0.00288785  |
| 234974_at    | GALM        | 1 252  | 3014  | 2 | 0.008442384 |
| 242338_at    | DKFZp762C11 | 180    | 434   | 2 | 0.008202307 |
| 222992_s_at  | NDUFB9      | 7 574  | 18195 | 2 | 0.004846564 |
| 218776_s_at  | FLJ23375    | 326    | 782   | 2 | 0.0055326   |
| 210224_at    | MR1         | 734    | 1759  | 2 | 0.008667433 |
| 217714_x_at  | STMN1       | 141    | 338   | 2 | 0.00651408  |
| 205306_x_at  | KMO         | 2 107  | 5038  | 2 | 0.007916679 |
| 228745_at    |             | 2 269  | 5414  | 2 | 0.005439692 |
| 206538_at    | MRAS        | 221    | 527   | 2 | 0.007846643 |
| 1554240_a_at | ITGAL       | 468    | 1115  | 2 | 0.008206727 |
| 212397_at    | RDX         | 2 468  | 5872  | 2 | 0.004981991 |
| 217297_s_at  | MYO9B       | 935    | 2224  | 2 | 0.003649189 |
| 204747_at    | IFIT4       | 224    | 530   | 2 | 0.007005649 |
| 223273_at    | C14orf142   | 1 505  | 3561  | 2 | 0.005659584 |
| 203791_at    | DMXL1       | 2 167  | 5125  | 2 | 0.004981991 |
| 231579_s_at  | TIMP2       | 8 774  | 20731 | 2 | 0.002111779 |
| 218043_s_at  | AZZ         | 378    | 892   | 2 | 0.007032035 |
| 226879_at    | MGC15619    | 1 414  | 3334  | 2 | 0.00238958  |
| 207565_s_at  | MR1         | 678    | 1593  | 2 | 0.006356867 |
| 204832_s_at  | BMPR1A      | 105    | 247   | 2 | 0.007187395 |
| 225922_at    | KIAA1450    | 5 155  | 12097 | 2 | 0.006180122 |
| 57540_at     | RBKS        | 79     | 184   | 2 | 0.008008457 |
| 212686_at    | PPM1H       | 183    | 428   | 2 | 0.009001202 |
| 209707_at    | PIGK        | 1 018  | 2378  | 2 | 0.002568779 |
| 212521_s_at  | PDE8A       | 620    | 1448  | 2 | 0.006301478 |
| 218946_at    | HIRIP5      | 1 275  | 2972  | 2 | 0.002265029 |
| 222116_s_at  | TBC1D16     | 282    | 656   | 2 | 0.006398586 |
| 214430_at    | GLA         | 6 222  | 14473 | 2 | 0.003804612 |
| 50221_at     | TFEB        | 895    | 2082  | 2 | 0.004567966 |

|              |           |        |       |   |             |
|--------------|-----------|--------|-------|---|-------------|
| 204262_s_at  | PSEN2     | 497    | 1155  | 2 | 0.009218273 |
| 202440_s_at  | ST5       | 182    | 422   | 2 | 0.006497498 |
| 201186_at    | LRPAP1    | 2 222  | 5152  | 2 | 0.005283754 |
| 229417_at    | STAU2     | 209    | 483   | 2 | 0.004354621 |
| 222764_at    | ASRGL1    | 385    | 889   | 2 | 0.009506578 |
| 223602_at    | USP30     | 311    | 718   | 2 | 0.00319285  |
| 1773_at      | FNTB      | 252    | 579   | 2 | 0.005925963 |
| 226305_at    | LYNX1     | 108    | 249   | 2 | 0.005439692 |
| 204764_at    | FNTB      | 222    | 511   | 2 | 0.007581988 |
| 212340_at    | MGC21416  | 401    | 923   | 2 | 0.009598163 |
| 223443_s_at  | FLJ32065  | 295    | 677   | 2 | 0.005932966 |
| 213287_s_at  | KRT10     | 864    | 1984  | 2 | 0.008082921 |
| 212699_at    | SCAMP5    | 148    | 340   | 2 | 0.006558333 |
| 211529_x_at  | HLA-G     | 15 585 | 35731 | 2 | 0.006416378 |
| 215707_s_at  | PRNP      | 1 712  | 3923  | 2 | 0.007112797 |
| 215737_x_at  | USF2      | 829    | 1893  | 2 | 0.004661708 |
| 226850_at    | SUMF1     | 3 302  | 7537  | 2 | 0.006157835 |
| 203589_s_at  | TFDP2     | 150    | 343   | 2 | 0.008138386 |
| 205639_at    | AOAH      | 973    | 2213  | 2 | 0.002809076 |
| 211528_x_at  | HLA-C     | 15 892 | 36129 | 2 | 0.002960477 |
| 220199_s_at  | FLJ12806  | 1 239  | 2813  | 2 | 0.004294998 |
| 201658_at    | ARL1      | 819    | 1851  | 2 | 0.004808748 |
| 221767_x_at  | HDLBP     | 3 266  | 7362  | 2 | 0.007300438 |
| 201471_s_at  | SQSTM1    | 3 823  | 8614  | 2 | 0.003663759 |
| 210633_x_at  | KRT10     | 848    | 1908  | 2 | 0.005179178 |
| 1557055_s_at | LOC284591 | 344    | 773   | 2 | 0.006421329 |
| 217436_x_at  |           | 5 112  | 11503 | 2 | 0.006062734 |
| 229396_at    | OVOL1     | 151    | 341   | 2 | 0.003198796 |
| 226247_at    | PLEKHA1   | 1 448  | 3254  | 2 | 0.007582557 |
| 228817_at    |           | 189    | 425   | 2 | 0.00681331  |
| 219771_at    | FLJ20298  | 106    | 239   | 2 | 0.007880473 |
| 37986_at     | EPOR      | 202    | 454   | 2 | 0.008259032 |
| 214269_at    | FLJ22269  | 179    | 401   | 2 | 0.007725497 |
| 227765_at    |           | 529    | 1186  | 2 | 0.009806656 |
| 239142_at    | LOC317671 | 119    | 266   | 2 | 0.006373512 |
| 226573_at    | DIRAS1    | 112    | 250   | 2 | 0.00250827  |
| 207023_x_at  | KRT10     | 654    | 1463  | 2 | 0.007926785 |
| 223466_x_at  | COL4A3BP  | 1 079  | 2406  | 2 | 0.005795157 |
| 225872_at    | SLC35F5   | 1 641  | 3652  | 2 | 0.003533478 |
| 222642_s_at  | FLJ10525  | 1 455  | 3236  | 2 | 0.009813144 |
| 218450_at    | HEBP1     | 5 307  | 11800 | 2 | 0.006445334 |
| 223808_s_at  | LOC114971 | 1 511  | 3351  | 2 | 0.00605805  |
| 242079_at    | RGS12     | 134    | 298   | 2 | 0.004391112 |
| 1554627_a_at | ASCC1     | 546    | 1211  | 2 | 0.002086809 |
| 214293_at    | FLJ10849  | 378    | 837   | 2 | 0.007880473 |
| 225343_at    | LOC283578 | 1 726  | 3816  | 2 | 0.004593346 |
| 224995_at    | SPIRE1    | 1 506  | 3320  | 2 | 0.006421329 |
| 229958_at    |           | 663    | 1461  | 2 | 0.003144705 |
| 212120_at    | PIGF      | 3 871  | 8521  | 2 | 0.004883776 |
| 208363_s_at  | INPP4A    | 204    | 447   | 2 | 0.004616654 |
| 1554303_at   | HNMT      | 70     | 153   | 2 | 0.004149745 |
| 203616_at    | POLB      | 1 100  | 2409  | 2 | 0.001704413 |
| 214583_at    | RSC1A1    | 204    | 445   | 2 | 0.009814426 |
| 211138_s_at  | KMO       | 2 306  | 5037  | 2 | 0.008838179 |
| 202902_s_at  | CTSS      | 18 261 | 39777 | 2 | 0.004673886 |
| 219104_at    | RNF141    | 297    | 644   | 2 | 0.002698024 |
| 203454_s_at  | ATOX1     | 3 101  | 6733  | 2 | 0.004240999 |
| 212345_s_at  | CREB3L2   | 1 073  | 2329  | 2 | 0.009243652 |
| 208869_s_at  | GABARAPL1 | 699    | 1511  | 2 | 0.008641618 |
| 218454_at    | FLJ22662  | 5 245  | 11326 | 2 | 0.008630009 |
| 223065_s_at  | STARD3NL  | 2 734  | 5892  | 2 | 0.003226358 |
| 213092_x_at  | KIAA0974  | 261    | 561   | 2 | 0.009664503 |
| 210257_x_at  | CUL4B     | 425    | 913   | 2 | 0.007813243 |
| 211373_s_at  | PSEN2     | 615    | 1319  | 2 | 0.005902847 |
| 202968_s_at  | DYRK2     | 631    | 1351  | 2 | 0.009826003 |
| 218047_at    | OSBPL9    | 2 963  | 6345  | 2 | 0.007695121 |
| 218924_s_at  | CTBS      | 1 280  | 2738  | 2 | 0.002669574 |
| 212053_at    | KIAA0251  | 2 043  | 4358  | 2 | 0.005673898 |
| 233651_s_at  | FLJ14981  | 570    | 1215  | 2 | 0.009515632 |
| 208731_at    | RAB2      | 2 629  | 5596  | 2 | 0.003986786 |
| 213352_at    | KIAA0779  | 381    | 810   | 2 | 0.005035395 |
| 200929_at    | TMP21     | 4 088  | 8693  | 2 | 0.007897362 |
| 221485_at    | B4GALT5   | 1 454  | 3089  | 2 | 0.00681331  |
| 201657_at    | ARL1      | 644    | 1363  | 2 | 0.00865458  |
| 204340_at    | CXorf12   | 327    | 692   | 2 | 0.004240999 |
| 202749_at    | WRB       | 1 638  | 3464  | 2 | 0.005776524 |
| 218739_at    | ABHD5     | 455    | 960   | 2 | 0.009709121 |
| 214590_s_at  | UBE2D1    | 726    | 1528  | 2 | 0.007897362 |
| 213324_at    | SRC       | 546    | 1150  | 2 | 0.009148663 |
| 204085_s_at  | CLN5      | 1 278  | 2687  | 2 | 0.004270136 |
| 218930_s_at  | FLJ11273  | 1 164  | 2445  | 2 | 0.002430013 |
| 206667_s_at  | SCAMP1    | 316    | 663   | 2 | 0.00428905  |
| 242617_at    | LOC283578 | 471    | 988   | 2 | 0.007322769 |

|              |           |        |       |   |             |
|--------------|-----------|--------|-------|---|-------------|
| 225320_at    | C10orf42  | 459    | 961   | 2 | 0.008493018 |
| 229846_s_at  | MAPKAP1   | 709    | 1483  | 2 | 0.003198796 |
| 203530_s_at  | STX4A     | 2 273  | 4754  | 2 | 0.003225261 |
| 218998_at    | FLJ20457  | 694    | 1448  | 2 | 0.005039999 |
| 227046_at    | SLC39A11  | 1 021  | 2127  | 2 | 0.007633727 |
| 207827_x_at  | SNCA      | 273    | 568   | 2 | 0.007725497 |
| 212631_at    |           | 2 106  | 4376  | 2 | 0.008767954 |
| 219806_s_at  | FN5       | 2 311  | 4794  | 2 | 0.006511738 |
| 204732_s_at  | ARFD1     | 208    | 431   | 2 | 0.005263619 |
| 217962_at    | NOLA3     | 8 810  | 18218 | 2 | 0.007119827 |
| 218855_at    | TPRA40    | 442    | 910   | 2 | 0.006519674 |
| 225147_at    | PSCD3     | 259    | 533   | 2 | 0.009661559 |
| 225851_at    | FNTB      | 660    | 1355  | 2 | 0.005839789 |
| 218416_s_at  | FLJ20489  | 280    | 575   | 2 | 0.005503035 |
| 206665_s_at  | BCL2L1    | 202    | 414   | 2 | 0.003028251 |
| 218159_at    | C20orf116 | 1 003  | 2051  | 2 | 0.00769323  |
| 226636_at    | PLD1      | 421    | 862   | 2 | 0.003849906 |
| 208919_s_at  | FLJ13052  | 2 166  | 4422  | 2 | 0.003144705 |
| 214257_s_at  | SEC22L1   | 3 380  | 6878  | 2 | 0.004413274 |
| 219374_s_at  | DIBD1     | 358    | 725   | 2 | 0.007660765 |
| 204084_s_at  | CLN5      | 2 103  | 4263  | 2 | 0.002969263 |
| 203089_s_at  | PRSS25    | 527    | 1065  | 2 | 0.005642256 |
| 217826_s_at  | UBE2J1    | 2 138  | 4318  | 2 | 0.008323176 |
| 208116_s_at  | MAN1A1    | 795    | 1606  | 2 | 0.007188018 |
| 202748_at    | GBP2      | 794    | 1604  | 2 | 0.004263972 |
| 1555202_a_at | P15RS     | 152    | 307   | 2 | 0.008593928 |
| 218204_s_at  | FYCO1     | 379    | 765   | 2 | 0.005712778 |
| 217118_s_at  | KIAA0930  | 8 206  | 16519 | 2 | 0.008893325 |
| 226664_at    | C20orf140 | 296    | 596   | 2 | 0.009811617 |
| 213975_s_at  | LYZ       | 20 158 | 40514 | 2 | 0.007882116 |
| 202657_s_at  | SERTAD2   | 1 513  | 3037  | 2 | 0.00577379  |
| 1555281_x_at | HSPC056   | 135    | 269   | 2 | 0.008702019 |
| 224723_x_at  |           | 1 004  | 2003  | 2 | 0.008480988 |

probesets significantly downregulated in DC-17 versus DC (Fold-change  $\leq 0,5$ )

| probeset     | symbol          | DC (mean expression) | DC-17 (mean expression) | fold-change DC-17/DC | BH corrected p values |
|--------------|-----------------|----------------------|-------------------------|----------------------|-----------------------|
| 215784_at    | CD1E            | 13779                | 7                       | <b>-2020</b>         | 0.0000228             |
| 207328_at    | ALOX15          | 9608                 | 7                       | <b>-1323</b>         | 0.0000298             |
| 223710_at    | CCL26           | 9994                 | 18                      | <b>-568</b>          | 0.000473753           |
| 206749_at    | CD1B            | 16146                | 50                      | <b>-323</b>          | 0.00000451            |
| 203440_at    | CDH2            | 1748                 | 6                       | <b>-308</b>          | 0.00037757            |
| 214079_at    | DHRS2           | 11881                | 41                      | <b>-293</b>          | 0.002096506           |
| 210325_at    | CD1A            | 24433                | 91                      | <b>-269</b>          | 0.000217365           |
| 39248_at     | AQP3            | 26162                | 132                     | <b>-198</b>          | 0.0000197             |
| 227475_at    | FOXQ1           | 11577                | 69                      | <b>-167</b>          | 0.000126318           |
| 205582_s_at  | GGTLA1          | 1086                 | 7                       | <b>-150</b>          | 0.000163655           |
| 205987_at    | CD1C            | 22135                | 158                     | <b>-140</b>          | 0.0000969             |
| 207900_at    | CCL17           | 5510                 | 42                      | <b>-133</b>          | 0.001157292           |
| 211734_s_at  | FCER1A          | 19921                | 152                     | <b>-131</b>          | 0.000473487           |
| 210548_at    | CCL23           | 17754                | 148                     | <b>-120</b>          | 0.00068589            |
| 210549_s_at  | CCL23           | 29924                | 259                     | <b>-116</b>          | 0.000163655           |
| 39249_at     | AQP3            | 3825                 | 35                      | <b>-110</b>          | 0.000164813           |
| 202286_s_at  | TACSTD2         | 6060                 | 58                      | <b>-104</b>          | 0.004288856           |
| 205630_at    | CRH             | 2243                 | 22                      | <b>-104</b>          | 0.00148951            |
| 225809_at    | DKFZP56400E1327 | 1327                 | 14                      | <b>-93</b>           | 0.00068589            |
| 244463_at    | ADAM23          | 293                  | 3                       | <b>-92</b>           | 0.00036201            |
| 208592_s_at  | CD1E            | 2514                 | 28                      | <b>-91</b>           | 0.000163655           |
| 219597_s_at  | DUOX1           | 3144                 | 37                      | <b>-86</b>           | 0.000304262           |
| 206463_s_at  | DHRS2           | 3393                 | 40                      | <b>-86</b>           | 0.003461801           |
| 205554_s_at  | DNASE1L3        | 32627                | 420                     | <b>-78</b>           | 0.000769949           |
| 209765_at    | ADAM19          | 4031                 | 64                      | <b>-63</b>           | 0.000054              |
| 210375_at    | PTGER3          | 910                  | 15                      | <b>-60</b>           | 0.007005649           |
| 206283_s_at  | TAL1            | 3063                 | 56                      | <b>-55</b>           | 0.000350532           |
| 227529_s_at  | AKAP12          | 63                   | 1                       | <b>-51</b>           | 0.000611018           |
| 209999_x_at  | SOCS1           | 605                  | 12                      | <b>-49</b>           | 0.000983556           |
| 209930_s_at  | NFE2            | 1223                 | 29                      | <b>-42</b>           | 0.003461801           |
| 213808_at    |                 | 281                  | 7                       | <b>-42</b>           | 0.001191628           |
| 230978_at    |                 | 253                  | 6                       | <b>-40</b>           | 0.000789183           |
| 1555564_a_at | IF              | 913                  | 23                      | <b>-39</b>           | 0.004242416           |
| 206148_at    | IL3RA           | 318                  | 8                       | <b>-39</b>           | 0.000087              |
| 206759_at    | FCER2           | 7054                 | 183                     | <b>-38</b>           | 0.001813951           |
| 232361_s_at  | EHF             | 283                  | 7                       | <b>-38</b>           | 0.000623224           |
| 206760_s_at  | FCER2           | 6386                 | 172                     | <b>-37</b>           | 0.003174669           |
| 207315_at    | CD226           | 1643                 | 46                      | <b>-36</b>           | 0.000231658           |
| 209686_at    | S100B           | 440                  | 13                      | <b>-35</b>           | 0.000769949           |
| 218717_s_at  | LEPREL1         | 154                  | 4                       | <b>-35</b>           | 0.00048043            |
| 227140_at    |                 | 445                  | 13                      | <b>-34</b>           | 0.001500924           |
| 206207_at    | CLC             | 5783                 | 172                     | <b>-34</b>           | 0.001784098           |
| 210108_at    | CACNA1D         | 446                  | 13                      | <b>-34</b>           | 0.008123281           |
| 210511_s_at  | INHBA           | 213                  | 6                       | <b>-33</b>           | 0.000211897           |
| 204311_at    | ATP1B2          | 1258                 | 39                      | <b>-32</b>           | 0.005251829           |

|              |             |       |      |     |             |
|--------------|-------------|-------|------|-----|-------------|
| 219959_at    | MOCOS       | 4097  | 129  | -32 | 0.003225261 |
| 227006_at    | PPP1R14A    | 1089  | 35   | -32 | 0.001063384 |
| 205392_s_at  | CCL14       | 4330  | 147  | -29 | 0.000732704 |
| 214219_x_at  | MAP4K1      | 524   | 18   | -29 | 0.000418667 |
| 214735_at    | PIP3-E      | 3842  | 140  | -27 | 0.000163655 |
| 210001_s_at  | SOCS1       | 3331  | 122  | -27 | 0.000232285 |
| 213790_at    | ADAM12      | 1781  | 65   | -27 | 0.001933033 |
| 203747_at    | AQP3        | 2016  | 76   | -27 | 0.000948343 |
| 237729_at    |             | 43    | 2    | -26 | 0.005566052 |
| 1255_g_at    | GUCA1A      | 343   | 13   | -26 | 0.001922759 |
| 206983_at    | CCR6        | 325   | 13   | -26 | 0.008145078 |
| 206181_at    | SLAMF1      | 2245  | 88   | -26 | 0.000505523 |
| 203854_at    | IF          | 1104  | 47   | -24 | 0.002035817 |
| 210517_s_at  | AKAP12      | 697   | 30   | -23 | 0.001030236 |
| 1555404_a_at | NIP         | 565   | 25   | -23 | 0.001948361 |
| 1559065_a_at | LSECtin     | 4592  | 200  | -23 | 0.000271378 |
| 205580_s_at  | HRH1        | 1891  | 83   | -23 | 0.003637512 |
| 220358_at    | SNFT        | 3562  | 160  | -22 | 0.000622683 |
| 226777_at    | ADAM12      | 2626  | 123  | -21 | 0.000535111 |
| 210832_x_at  | PTGER3      | 791   | 37   | -21 | 0.007691249 |
| 238845_at    |             | 208   | 10   | -21 | 0.004982975 |
| 236184_at    |             | 449   | 22   | -20 | 0.007488083 |
| 206407_s_at  | CCL13       | 40441 | 2007 | -20 | 0.001819326 |
| 217504_at    | ABCA6       | 6734  | 337  | -20 | 0.001275065 |
| 217080_s_at  | HOMER2      | 4567  | 231  | -20 | 0.000126318 |
| 225525_at    | KIAA1671    | 5102  | 261  | -20 | 0.005776524 |
| 239427_at    |             | 1291  | 66   | -20 | 0.00148951  |
| 205931_s_at  | CREB5       | 563   | 29   | -19 | 0.001423712 |
| 202468_s_at  | CTNNA1      | 10608 | 555  | -19 | 0.000054    |
| 223961_s_at  | CISH        | 4532  | 241  | -19 | 0.0000431   |
| 221029_s_at  | WNT5B       | 1512  | 82   | -18 | 0.006403969 |
| 231227_at    | WNT5A       | 454   | 25   | -18 | 0.002795184 |
| 205990_s_at  | WNT5A       | 1970  | 110  | -18 | 0.000860456 |
| 204562_at    | IRF4        | 2848  | 161  | -18 | 0.000178367 |
| 213316_at    |             | 159   | 9    | -18 | 0.007119827 |
| 202952_s_at  | ADAM12      | 2517  | 145  | -17 | 0.000432686 |
| 1554648_a_at | NIP         | 1166  | 70   | -17 | 0.001094852 |
| 204254_s_at  | VDR         | 7112  | 431  | -17 | 0.000163655 |
| 204255_s_at  | VDR         | 5044  | 308  | -16 | 0.000134137 |
| 219255_x_at  | IL17RB      | 959   | 62   | -16 | 0.008236288 |
| 227463_at    | ACE         | 6471  | 422  | -15 | 0.003410754 |
| 227799_at    | MYO1G       | 835   | 55   | -15 | 0.008501538 |
| 231372_at    |             | 3461  | 228  | -15 | 0.001259428 |
| 229228_at    |             | 1396  | 92   | -15 | 0.000496982 |
| 221170_at    | HRH4        | 351   | 23   | -15 | 0.005524052 |
| 1555600_s_at | APOL4       | 3241  | 215  | -15 | 0.001998605 |
| 238576_at    |             | 619   | 41   | -15 | 0.009982407 |
| 230846_at    |             | 627   | 42   | -15 | 0.003489382 |
| 1556097_at   |             | 2796  | 192  | -15 | 0.000178367 |
| 229065_at    | SLC35F3     | 1443  | 100  | -14 | 0.009300427 |
| 205227_at    | IL1RAP      | 1845  | 128  | -14 | 0.000178367 |
| 204687_at    | DKFZP564O0E | 1392  | 103  | -13 | 0.002111779 |
| 206296_x_at  | MAP4K1      | 736   | 55   | -13 | 0.000419704 |
| 205220_at    | GPR109B     | 3206  | 242  | -13 | 0.00967292  |
| 206950_at    | SCN9A       | 1451  | 110  | -13 | 0.001094852 |
| 205404_at    | HSD11B1     | 3826  | 290  | -13 | 0.003922086 |
| 207651_at    | H963        | 882   | 68   | -13 | 0.009592596 |
| 240143_at    |             | 120   | 9    | -13 | 0.004795085 |
| 229199_at    |             | 756   | 59   | -13 | 0.000361342 |
| 232244_at    | KIAA1161    | 704   | 56   | -13 | 0.002899225 |
| 205402_x_at  | PRSS3       | 115   | 9    | -13 | 0.003302552 |
| 219517_at    | ELL3        | 1774  | 142  | -13 | 0.001905287 |
| 226891_at    | FLJ35155    | 698   | 56   | -12 | 0.00604506  |
| 205015_s_at  | TGFA        | 87    | 7    | -12 | 0.003215483 |
| 209757_s_at  | MYCN        | 87    | 7    | -12 | 0.001704413 |
| 206453_s_at  | NDRG2       | 2565  | 211  | -12 | 0.006589381 |
| 228654_at    | LOC139886   | 1803  | 151  | -12 | 0.000622683 |
| 210264_at    | GPR35       | 1277  | 108  | -12 | 0.002441727 |
| 1552807_a_at | SIGLEC10    | 5085  | 432  | -12 | 0.003478975 |
| 231120_x_at  | PKIB        | 987   | 85   | -12 | 0.002213944 |
| 206682_at    | CLECSF14    | 23266 | 1998 | -12 | 0.003334536 |
| 1558225_at   |             | 69    | 6    | -12 | 0.009664503 |
| 206046_at    | ADAM23      | 431   | 37   | -12 | 0.000987515 |
| 223551_at    | PKIB        | 6002  | 527  | -11 | 0.001227419 |
| 240856_at    |             | 427   | 37   | -11 | 0.005879371 |
| 211021_s_at  | RGS14       | 163   | 14   | -11 | 0.001967346 |
| 213425_at    | WNT5A       | 1101  | 99   | -11 | 0.005902598 |
| 201830_s_at  | NET1        | 1879  | 169  | -11 | 0.001107326 |
| 240690_at    |             | 2273  | 206  | -11 | 0.000778748 |
| 226071_at    | TSRC1       | 3387  | 309  | -11 | 0.0001669   |
| 223377_x_at  | CISH        | 7979  | 732  | -11 | 0.0000607   |
| 244654_at    | MYO1G       | 1219  | 114  | -11 | 0.00330048  |
| 218522_s_at  | BPY2IP1     | 4444  | 415  | -11 | 0.000054    |



|              |             |       |      |     |             |
|--------------|-------------|-------|------|-----|-------------|
| 202718_at    | IGFBP2      | 254   | 24   | -11 | 0.005065282 |
| 234657_at    |             | 464   | 44   | -10 | 0.005179178 |
| 205721_at    | GFRA2       | 1970  | 189  | -10 | 0.00242647  |
| 209567_at    | RRS1        | 6938  | 666  | -10 | 0.000280442 |
| 225612_s_at  | B3GNT5      | 8511  | 818  | -10 | 0.00044483  |
| 202350_s_at  | MATN2       | 367   | 36   | -10 | 0.000178367 |
| 205579_at    | HRH1        | 3433  | 338  | -10 | 0.003152804 |
| 223537_s_at  | WNT5B       | 715   | 71   | -10 | 0.002111779 |
| 231234_at    | CTSC        | 8145  | 816  | -10 | 0.003037332 |
| 222549_at    | CLDN1       | 801   | 81   | -10 | 0.003470588 |
| 206039_at    | RAB33A      | 2639  | 267  | -10 | 0.000751317 |
| 242541_at    | ABCA9       | 521   | 53   | -10 | 0.007082976 |
| 232555_at    | CREB5       | 472   | 48   | -10 | 0.008593928 |
| 221724_s_at  | CLECSF6     | 18426 | 1898 | -10 | 0.0000969   |
| 204916_at    | RAMP1       | 4903  | 507  | -10 | 0.000194206 |
| 216735_x_at  |             | 285   | 30   | -10 | 0.002198662 |
| 1561336_at   | DNASE1L3    | 286   | 30   | -9  | 0.009747816 |
| 221223_x_at  | CISH        | 6611  | 708  | -9  | 0.000137836 |
| 225645_at    | EHF         | 3047  | 329  | -9  | 0.006972171 |
| 227499_at    |             | 303   | 33   | -9  | 0.000387098 |
| 1554383_a_at | TRAM2       | 138   | 15   | -9  | 0.001688076 |
| 220266_s_at  | KLF4        | 1649  | 184  | -9  | 0.004655182 |
| 227193_at    |             | 4548  | 512  | -9  | 0.0014622   |
| 221841_s_at  | KLF4        | 14411 | 1625 | -9  | 0.003460727 |
| 209749_s_at  | ACE         | 681   | 78   | -9  | 0.006790927 |
| 213230_at    | HUMPPA      | 1733  | 199  | -9  | 0.004023633 |
| 1554542_at   | LOC153328   | 1654  | 191  | -9  | 0.00132752  |
| 219278_at    | MAP3K6      | 829   | 98   | -8  | 0.000822443 |
| 1552806_a_at | SIGLEC10    | 937   | 112  | -8  | 0.003066467 |
| 244547_at    | FLJ25006    | 732   | 88   | -8  | 0.00273589  |
| 216925_s_at  | TAL1        | 341   | 41   | -8  | 0.006537327 |
| 1568964_x_at | SPN         | 7637  | 926  | -8  | 0.006361708 |
| 219518_s_at  | ELL3        | 859   | 105  | -8  | 0.002035817 |
| 228504_at    | SCN7A       | 93    | 11   | -8  | 0.001050711 |
| 230980_x_at  |             | 110   | 14   | -8  | 0.002220231 |
| 219850_s_at  | EHF         | 269   | 33   | -8  | 0.0014622   |
| 204253_s_at  | VDR         | 743   | 92   | -8  | 0.003649189 |
| 201829_at    | NET1        | 2676  | 330  | -8  | 0.000880882 |
| 235085_at    | DKFZp761P04 | 12518 | 1557 | -8  | 0.000045    |
| 206437_at    | EDG6        | 411   | 51   | -8  | 0.008344202 |
| 214279_s_at  | NDRG2       | 1084  | 136  | -8  | 0.005566052 |
| 220162_s_at  | CARD9       | 2758  | 346  | -8  | 0.000163655 |
| 229954_at    | CHDH        | 278   | 35   | -8  | 0.003908998 |
| 222217_s_at  | SLC27A3     | 9813  | 1239 | -8  | 0.000904172 |
| 1554079_at   | MGC71806    | 1669  | 212  | -8  | 0.001205147 |
| 203574_at    | NFIL3       | 8949  | 1136 | -8  | 0.00197542  |
| 1568633_a_at |             | 409   | 52   | -8  | 0.009603605 |
| 214510_at    | GPR20       | 227   | 29   | -8  | 0.002704743 |
| 240165_at    |             | 2078  | 270  | -8  | 0.002376383 |
| 219947_at    | CLECSF6     | 25835 | 3356 | -8  | 0.000188635 |
| 231887_s_at  | PALD        | 620   | 81   | -8  | 0.001205147 |
| 210815_s_at  | CALCRL      | 1127  | 147  | -8  | 0.00099551  |
| 205698_s_at  | MAP2K6      | 2287  | 299  | -8  | 0.000304262 |
| 210220_at    | FZD2        | 6481  | 850  | -8  | 0.000405156 |
| 207277_at    | CD209       | 21373 | 2838 | -8  | 0.007745263 |
| 210506_at    | FUT7        | 328   | 44   | -8  | 0.000655546 |
| 215602_at    | FGD2        | 762   | 101  | -8  | 0.000549749 |
| 229569_at    |             | 423   | 57   | -7  | 0.005197031 |
| 207362_at    | SLC30A4     | 243   | 33   | -7  | 0.008838179 |
| 243771_at    |             | 67    | 9    | -7  | 0.005932966 |
| 220578_at    | FLJ13544    | 540   | 74   | -7  | 0.000667949 |
| 1570607_at   |             | 234   | 33   | -7  | 0.002338195 |
| 219232_s_at  | EGLN3       | 565   | 79   | -7  | 0.002960477 |
| 226844_at    | MOBKLB      | 5686  | 797  | -7  | 0.000126318 |
| 232136_s_at  | CORTBP2     | 1831  | 259  | -7  | 0.001401137 |
| 1555626_a_at | SLAMF1      | 491   | 70   | -7  | 0.000500495 |
| 232360_at    | EHF         | 441   | 63   | -7  | 0.002454434 |
| 207826_s_at  | ID3         | 3571  | 514  | -7  | 0.003584476 |
| 202431_s_at  | MYC         | 2706  | 389  | -7  | 0.008429267 |
| 213248_at    | LOC221362   | 384   | 55   | -7  | 0.006764764 |
| 230523_at    |             | 83    | 12   | -7  | 0.006047025 |
| 228390_at    |             | 1267  | 183  | -7  | 0.002157051 |
| 225546_at    | EEF2K       | 3763  | 545  | -7  | 0.0000607   |
| 229733_s_at  |             | 5662  | 823  | -7  | 0.00148951  |
| 216986_s_at  | IRF4        | 182   | 26   | -7  | 0.000880882 |
| 206331_at    | CALCRL      | 1321  | 193  | -7  | 0.000923481 |
| 219683_at    | FZD3        | 608   | 90   | -7  | 0.000880882 |
| 202085_at    | TJP2        | 4304  | 639  | -7  | 0.003374521 |
| 213644_at    | MGC33887    | 766   | 114  | -7  | 0.009451604 |
| 222062_at    | IL27RA      | 5666  | 846  | -7  | 0.000522409 |
| 228955_at    |             | 536   | 81   | -7  | 0.000549749 |
| 209281_s_at  | ATP2B1      | 6220  | 943  | -7  | 0.001511555 |
| 215139_at    | ARHGEF10    | 29    | 4    | -7  | 0.009946816 |

|              |             |       |      |             |             |
|--------------|-------------|-------|------|-------------|-------------|
| 239082_at    | 859         | 131   | -7   | 0.000816709 |             |
| 1557002_x_at | LOC339768   | 198   | 30   | -7          | 0.002655519 |
| 229715_at    | 829         | 127   | -7   | 0.001487468 |             |
| 231396_s_at  | DRCTNNB1A   | 956   | 146  | -7          | 0.000639368 |
| 232147_at    | BTBD12      | 1525  | 234  | -7          | 0.001173568 |
| 226175_at    | MGC29649    | 6014  | 922  | -7          | 0.000971539 |
| 218918_at    | MAN1C1      | 8682  | 1336 | -6          | 0.00227813  |
| 1569607_s_at | 3290        | 508   | -6   | 0.003663759 |             |
| 1558518_at   | TAB3        | 171   | 27   | -6          | 0.004017383 |
| 204166_at    | KIAA0963    | 1322  | 205  | -6          | 0.002436    |
| 212846_at    | KIAA0179    | 18075 | 2808 | -6          | 0.000163655 |
| 1569608_x_at | 368         | 58    | -6   | 0.007358791 |             |
| 242414_at    | QPRT        | 11555 | 1815 | -6          | 0.00341899  |
| 218642_s_at  | CHCHD7      | 3187  | 501  | -6          | 0.000163655 |
| 233555_s_at  | SULF2       | 5367  | 848  | -6          | 0.005189234 |
| 1556332_at   | 429         | 68    | -6   | 0.002581379 |             |
| 229568_at    | MOBKLB      | 3550  | 565  | -6          | 0.000473753 |
| 236570_at    | ZNF366      | 470   | 75   | -6          | 0.00132752  |
| 223631_s_at  | C19orf33    | 192   | 31   | -6          | 0.009826003 |
| 228090_at    | NMNAT3      | 1901  | 306  | -6          | 0.000418667 |
| 227239_at    | DRCTNNB1A   | 7921  | 1283 | -6          | 0.000585182 |
| 243015_at    | CYP3A5      | 41    | 7    | -6          | 0.000769949 |
| 229072_at    | 1187        | 193   | -6   | 0.001840984 |             |
| 1554835_a_at | B3GNT5      | 690   | 112  | -6          | 0.002581975 |
| 226218_at    | IL7R        | 929   | 151  | -6          | 0.007005649 |
| 228108_at    | 3941        | 641   | -6   | 0.004596465 |             |
| 235643_at    | FLJ39885    | 1037  | 169  | -6          | 0.009443844 |
| 1569385_s_at | KIAA1546    | 348   | 57   | -6          | 0.005876942 |
| 212173_at    | AK2         | 675   | 111  | -6          | 0.001784098 |
| 212844_at    | KIAA0179    | 1242  | 204  | -6          | 0.000399477 |
| 209703_x_at  | DKFZP586A05 | 3183  | 523  | -6          | 0.007477495 |
| 239648_at    | MGC48972    | 1035  | 171  | -6          | 0.000948343 |
| 213358_at    | KIAA0802    | 1222  | 202  | -6          | 0.004283294 |
| 207890_s_at  | MMP25       | 935   | 155  | -6          | 0.001511555 |
| 222768_s_at  | CGI-09      | 1595  | 266  | -6          | 0.005549172 |
| 218394_at    | FLJ22386    | 2209  | 370  | -6          | 0.001535305 |
| 207653_at    | FOXO2       | 85    | 14   | -6          | 0.004231672 |
| 208798_x_at  | GOLGIN-67   | 5597  | 954  | -6          | 0.003899665 |
| 230343_at    | 515         | 88    | -6   | 0.008241668 |             |
| 234996_at    | CALCRL      | 354   | 61   | -6          | 0.000473487 |
| 203372_s_at  | SOCS2       | 270   | 46   | -6          | 0.000864357 |
| 216268_s_at  | JAG1        | 6352  | 1090 | -6          | 0.000683573 |
| 207067_s_at  | HDC         | 537   | 92   | -6          | 0.002794001 |
| 212741_at    | MAOA        | 11193 | 1931 | -6          | 0.001665308 |
| 226991_at    | NFATC2      | 1732  | 299  | -6          | 0.0027403   |
| 202218_s_at  | FADS2       | 1585  | 276  | -6          | 0.003920105 |
| 202368_s_at  | TRAM2       | 1393  | 243  | -6          | 0.004121848 |
| 239072_at    | 688         | 120   | -6   | 0.001972398 |             |
| 203373_at    | SOCS2       | 829   | 145  | -6          | 0.007912237 |
| 241098_at    | CLECSF12    | 459   | 81   | -6          | 0.001931375 |
| 227856_at    | FLJ39370    | 3893  | 690  | -6          | 0.002111779 |
| 201945_at    | FURIN       | 3961  | 703  | -6          | 0.000639368 |
| 226776_at    | e(y)2       | 352   | 62   | -6          | 0.001259428 |
| 236404_at    | 738         | 131   | -6   | 0.007078781 |             |
| 1564164_at   | FAM31B      | 2076  | 371  | -6          | 0.006651773 |
| 226959_at    | 2544        | 459   | -6   | 0.001279781 |             |
| 225173_at    | ARHGAP18    | 16261 | 2940 | -6          | 0.003377543 |
| 205559_s_at  | PCSK5       | 2031  | 368  | -6          | 0.005902598 |
| 1554892_a_at | MS4A3       | 217   | 39   | -6          | 0.001784098 |
| 219727_at    | DUOX2       | 153   | 28   | -6          | 0.001661391 |
| 201015_s_at  | JUP         | 1015  | 185  | -5          | 0.002050574 |
| 222258_s_at  | SH3BP4      | 545   | 99   | -5          | 0.004847216 |
| 225646_at    | CTSC        | 47772 | 8767 | -5          | 0.000458273 |
| 210425_x_at  | GOLGIN-67   | 2510  | 462  | -5          | 0.00139891  |
| 213652_at    | PCSK5       | 833   | 153  | -5          | 0.008187628 |
| 213650_at    | GOLGIN-67   | 1171  | 218  | -5          | 0.000586117 |
| 204834_at    | FGL2        | 35021 | 6533 | -5          | 0.005832639 |
| 219935_at    | ADAMTS5     | 88    | 16   | -5          | 0.007500606 |
| 205629_s_at  | CRH         | 222   | 42   | -5          | 0.003843903 |
| 228231_at    | NUDT1       | 2675  | 503  | -5          | 0.001784098 |
| 226382_at    | LOC283070   | 3747  | 710  | -5          | 0.002742492 |
| 204860_s_at  | BIRC1       | 8006  | 1521 | -5          | 0.005035395 |
| 229506_at    | 1812        | 344   | -5   | 0.001948361 |             |
| 242769_at    | 862         | 166   | -5   | 0.002794001 |             |
| 219316_s_at  | C14orf58    | 3364  | 649  | -5          | 0.00148951  |
| 205798_at    | IL7R        | 697   | 135  | -5          | 0.007042596 |
| 1554547_at   | FAM13C1     | 34    | 7    | -5          | 0.006474254 |
| 1556314_a_at | 9903        | 1919  | -5   | 0.003854828 |             |
| 200787_s_at  | PEA15       | 8727  | 1691 | -5          | 0.002581975 |
| 202308_at    | SREBF1      | 1846  | 362  | -5          | 0.002225319 |
| 238129_s_at  | FZD2        | 1036  | 204  | -5          | 0.000522409 |
| 226416_at    | 3'HEXO      | 4195  | 825  | -5          | 0.005689354 |
| 244031_at    | 331         | 65    | -5   | 0.006589381 |             |

|              |           |       |      |    |             |
|--------------|-----------|-------|------|----|-------------|
| 232406_at    |           | 624   | 123  | -5 | 0.000500495 |
| 202479_s_at  | TRIB2     | 321   | 64   | -5 | 0.004354621 |
| 1552875_a_at | CD200R    | 2262  | 453  | -5 | 0.006486122 |
| 215116_s_at  | DNM1      | 755   | 152  | -5 | 0.001818504 |
| 202565_s_at  | SVIL      | 2980  | 599  | -5 | 0.003489382 |
| 227530_at    | AKAP12    | 196   | 39   | -5 | 0.003417005 |
| 203145_at    | SPAG5     | 1174  | 238  | -5 | 0.00568033  |
| 222668_at    | KCTD15    | 252   | 51   | -5 | 0.009943016 |
| 222662_at    | LOC286044 | 2011  | 409  | -5 | 0.002182854 |
| 227741_at    | PTPLB     | 3076  | 627  | -5 | 0.002433133 |
| 235626_at    | CAMK1D    | 2335  | 477  | -5 | 0.000880882 |
| 205743_at    | STAC      | 1925  | 393  | -5 | 0.003623424 |
| 203358_s_at  | EZH2      | 919   | 189  | -5 | 0.008538925 |
| 203796_s_at  | BCL7A     | 639   | 131  | -5 | 0.00159073  |
| 226893_at    | ABL2      | 2889  | 593  | -5 | 0.000419704 |
| 228341_at    | FLJ31265  | 1689  | 348  | -5 | 0.000457356 |
| 226789_at    |           | 15643 | 3258 | -5 | 0.000968666 |
| 1565752_at   | FGD2      | 1627  | 342  | -5 | 0.009406897 |
| 215716_s_at  | ATP2B1    | 10237 | 2150 | -5 | 0.002809076 |
| 1557193_at   |           | 696   | 146  | -5 | 0.001860485 |
| 219736_at    | TRIM36    | 1032  | 218  | -5 | 0.002437719 |
| 204949_at    | ICAM3     | 830   | 175  | -5 | 0.003198796 |
| 223994_s_at  | SLC12A9   | 415   | 88   | -5 | 0.006024424 |
| 214054_at    | DOK2      | 5191  | 1103 | -5 | 0.000957522 |
| 200931_s_at  | VCL       | 18465 | 3949 | -5 | 0.000986083 |
| 204388_s_at  | MAOA      | 4313  | 922  | -5 | 0.003320727 |
| 208433_s_at  | LRP8      | 751   | 161  | -5 | 0.000418667 |
| 219229_at    | SLCO3A1   | 1667  | 357  | -5 | 0.000789183 |
| 232931_at    | U5-200KD  | 1703  | 366  | -5 | 0.002060091 |
| 215151_at    | DOCK10    | 367   | 79   | -5 | 0.006477234 |
| 212174_at    | AK2       | 4588  | 990  | -5 | 0.002183623 |
| 202089_s_at  | SLC39A6   | 5627  | 1215 | -5 | 0.004008145 |
| 212510_at    | KIAA0089  | 4521  | 980  | -5 | 0.00132752  |
| 226810_at    |           | 21834 | 4747 | -5 | 0.000680986 |
| 200906_s_at  | KIAA0992  | 1487  | 324  | -5 | 0.004901855 |
| 213577_at    | SQLE      | 1420  | 310  | -5 | 0.008187628 |
| 237623_at    | CST3      | 940   | 205  | -5 | 0.003021064 |
| 1555372_at   | BCL2L11   | 944   | 207  | -5 | 0.007916679 |
| 211596_s_at  | LRIG1     | 429   | 94   | -5 | 0.002213944 |
| 218854_at    | SART2     | 12858 | 2838 | -5 | 0.000387098 |
| 208015_at    | SMAD1     | 210   | 46   | -5 | 0.006255972 |
| 213038_at    | IBRDC3    | 2669  | 591  | -5 | 0.00197542  |
| 232231_at    |           | 1712  | 379  | -5 | 0.003788429 |
| 210340_s_at  | CSF2RA    | 1967  | 437  | -4 | 0.006349831 |
| 212750_at    | PPP1R16B  | 858   | 191  | -4 | 0.00604506  |
| 227451_s_at  |           | 2285  | 508  | -4 | 0.00098343  |
| 209098_s_at  | JAG1      | 564   | 125  | -4 | 0.006104243 |
| 238063_at    | FLJ32028  | 442   | 99   | -4 | 0.005189234 |
| 200907_s_at  | KIAA0992  | 8869  | 1978 | -4 | 0.002433133 |
| 221698_s_at  | CLECSF12  | 27597 | 6156 | -4 | 0.003594423 |
| 212175_s_at  | AK2       | 4023  | 898  | -4 | 0.001075726 |
| 202047_s_at  | CBX6      | 6937  | 1551 | -4 | 0.000870148 |
| 209099_x_at  | JAG1      | 7562  | 1696 | -4 | 0.001314611 |
| 227524_at    |           | 476   | 107  | -4 | 0.002704743 |
| 221867_at    | FLJ31821  | 1710  | 384  | -4 | 0.002355878 |
| 229265_at    | SKI       | 1993  | 450  | -4 | 0.000702631 |
| 1568593_a_at | LOC152195 | 1432  | 324  | -4 | 0.006152463 |
| 205996_s_at  | AK2       | 2507  | 567  | -4 | 0.002113768 |
| 226925_at    | FLJ23751  | 1372  | 311  | -4 | 0.001969869 |
| 229431_at    | RFXAP     | 1117  | 253  | -4 | 0.004050464 |
| 217651_at    |           | 109   | 25   | -4 | 0.009324125 |
| 241233_x_at  | C21orf81  | 758   | 173  | -4 | 0.004508083 |
| 219938_s_at  | PSTPIP2   | 3454  | 793  | -4 | 0.001956272 |
| 241397_at    | EHF       | 214   | 49   | -4 | 0.00701067  |
| 204601_at    | N4BP1     | 3889  | 900  | -4 | 0.000419253 |
| 215613_at    | ADAM12    | 159   | 37   | -4 | 0.006063804 |
| 227458_at    | PDCD1LG1  | 7599  | 1763 | -4 | 0.000418667 |
| 220411_x_at  | FLJ23447  | 224   | 52   | -4 | 0.004272205 |
| 209360_s_at  | RUNX1     | 3106  | 724  | -4 | 0.001535305 |
| 201037_at    | PFKP      | 7489  | 1745 | -4 | 0.001196518 |
| 1570007_at   |           | 861   | 201  | -4 | 0.005259381 |
| 232365_at    | SIAH1     | 139   | 32   | -4 | 0.00301952  |
| 204389_at    | MAOA      | 2031  | 478  | -4 | 0.003192828 |
| 241392_at    | FLJ10902  | 753   | 177  | -4 | 0.004062019 |
| 222701_s_at  | CHCHD7    | 6783  | 1600 | -4 | 0.000432438 |
| 239567_at    |           | 483   | 114  | -4 | 0.006021333 |
| 217007_s_at  | ADAM15    | 427   | 101  | -4 | 0.001408079 |
| 204908_s_at  | BCL3      | 2361  | 560  | -4 | 0.007599676 |
| 222826_at    | PLDN      | 10728 | 2553 | -4 | 0.000217365 |
| 225776_at    | RBMS2     | 1452  | 346  | -4 | 0.001191628 |
| 205418_at    | FES       | 2033  | 485  | -4 | 0.004093992 |
| 209212_s_at  | KLF5      | 234   | 56   | -4 | 0.00696117  |
| 226659_at    | DEF6      | 1134  | 271  | -4 | 0.000904172 |

|              |           |       |      |    |             |
|--------------|-----------|-------|------|----|-------------|
| 1553292_s_at | FLJ25006  | 1044  | 250  | -4 | 0.001105248 |
| 214180_at    | MAN1C1    | 1591  | 382  | -4 | 0.004270136 |
| 223658_at    | KCNK6     | 2491  | 600  | -4 | 0.000420619 |
| 209710_at    | GATA2     | 607   | 146  | -4 | 0.001423712 |
| 223019_at    | C9orf88   | 4494  | 1082 | -4 | 0.00190312  |
| 227084_at    | DTNA      | 1698  | 409  | -4 | 0.001431599 |
| 224883_at    | PLDN      | 5587  | 1346 | -4 | 0.000424384 |
| 236947_at    |           | 227   | 55   | -4 | 0.008242819 |
| 208963_x_at  | FADS1     | 3082  | 743  | -4 | 0.005421304 |
| 200644_at    | MLP       | 926   | 224  | -4 | 0.007116467 |
| 216199_s_at  | MAP3K4    | 3211  | 777  | -4 | 0.001948361 |
| 204967_at    | APXL      | 447   | 108  | -4 | 0.000886409 |
| 1556608_a_at | EHD4      | 329   | 80   | -4 | 0.006469697 |
| 232579_at    |           | 512   | 125  | -4 | 0.000933232 |
| 223625_at    | DRCTNNB1A | 1467  | 360  | -4 | 0.001784098 |
| 36564_at     | IBRDC3    | 2890  | 709  | -4 | 0.00588027  |
| 205016_at    | TGFA      | 2013  | 494  | -4 | 0.003021064 |
| 231183_s_at  | JAG1      | 789   | 195  | -4 | 0.000387098 |
| 228457_at    |           | 1539  | 382  | -4 | 0.003112693 |
| 221750_at    | HMGCS1    | 1632  | 406  | -4 | 0.006021333 |
| 208940_at    | SEPHS1    | 1068  | 266  | -4 | 0.008247017 |
| 205128_x_at  | PTGS1     | 7987  | 1995 | -4 | 0.003783859 |
| 203231_s_at  | SCA1      | 2726  | 682  | -4 | 0.003535133 |
| 215813_s_at  | PTGS1     | 7025  | 1758 | -4 | 0.002050574 |
| 1552275_s_at | PXK       | 2545  | 638  | -4 | 0.002180353 |
| 38290_at     | RGS14     | 1117  | 281  | -4 | 0.003225261 |
| 212930_at    | ATP2B1    | 3858  | 973  | -4 | 0.002985143 |
| 210993_s_at  | SMAD1     | 2144  | 541  | -4 | 0.00577452  |
| 1569107_s_at | FLJ16030  | 906   | 229  | -4 | 0.001408079 |
| 233427_x_at  |           | 414   | 105  | -4 | 0.007841297 |
| 228442_at    | NFATC2    | 1264  | 320  | -4 | 0.001259428 |
| 200959_at    | FUS       | 3217  | 816  | -4 | 0.009632287 |
| 229597_s_at  | WDFY4     | 6322  | 1606 | -4 | 0.006812275 |
| 212159_x_at  | AP2A2     | 17548 | 4468 | -4 | 0.004270136 |
| 37996_s_at   | DMPK      | 334   | 85   | -4 | 0.003053932 |
| 225778_at    | RBMS2     | 1199  | 306  | -4 | 0.002111779 |
| 228603_at    |           | 1781  | 454  | -4 | 0.006010837 |
| 231907_at    | ABL2      | 2923  | 747  | -4 | 0.000654219 |
| 207008_at    | IL8RB     | 634   | 162  | -4 | 0.004614913 |
| 226726_at    | LOC129642 | 945   | 241  | -4 | 0.008091899 |
| 201482_at    | QSCN6     | 4567  | 1170 | -4 | 0.001423712 |
| 238469_at    | OGFRL1    | 4072  | 1047 | -4 | 0.000870766 |
| 225166_at    | ARHGAP18  | 3076  | 793  | -4 | 0.000721088 |
| 204999_s_at  | ATF5      | 724   | 187  | -4 | 0.003470588 |
| 237442_at    |           | 397   | 103  | -4 | 0.007871904 |
| 234041_at    |           | 186   | 48   | -4 | 0.005692375 |
| 212748_at    | MKL1      | 1572  | 407  | -4 | 0.001967346 |
| 205822_s_at  | HMGCS1    | 463   | 120  | -4 | 0.001196518 |
| 222866_s_at  | C14orf58  | 1776  | 461  | -4 | 0.002243203 |
| 230178_s_at  | STATIP1   | 966   | 251  | -4 | 0.005447401 |
| 219265_at    | MOBKL2B   | 1309  | 341  | -4 | 0.001813951 |
| 207085_x_at  | CSF2RA    | 3284  | 862  | -4 | 0.000684189 |
| 220023_at    | APOB48R   | 1291  | 339  | -4 | 0.003655871 |
| 211779_x_at  | AP2A2     | 16743 | 4406 | -4 | 0.004198819 |
| 1552302_at   | MGC20235  | 2747  | 723  | -4 | 0.002082798 |
| 1560112_at   |           | 380   | 101  | -4 | 0.002490681 |
| 235054_at    | FLJ31265  | 822   | 218  | -4 | 0.000683573 |
| 230100_x_at  |           | 2324  | 616  | -4 | 0.001301147 |
| 229215_at    | ASCL2     | 645   | 172  | -4 | 0.000933232 |
| 229776_at    | SLCO3A1   | 408   | 108  | -4 | 0.003875337 |
| 1552274_at   | PXK       | 2426  | 648  | -4 | 0.00108368  |
| 1558236_at   |           | 612   | 165  | -4 | 0.003943724 |
| 215354_s_at  | PELP1     | 948   | 256  | -4 | 0.001259428 |
| 227083_at    | B3GTL     | 376   | 102  | -4 | 0.009515624 |
| 202369_s_at  | TRAM2     | 2492  | 673  | -4 | 0.004254351 |
| 203187_at    | DOCK1     | 799   | 216  | -4 | 0.005160543 |
| 202067_s_at  | LDLR      | 456   | 124  | -4 | 0.003225261 |
| 202613_at    | CTPS      | 703   | 191  | -4 | 0.000702631 |
| 227514_at    | LOC162073 | 1765  | 483  | -4 | 0.003863435 |
| 225325_at    | FLJ20160  | 6958  | 1906 | -4 | 0.00995092  |
| 242943_at    | SIAT8D    | 6363  | 1748 | -4 | 0.005472396 |
| 223586_at    | ARNTL2    | 448   | 123  | -4 | 0.001937214 |
| 215760_s_at  | KIAA0963  | 375   | 103  | -4 | 0.007869619 |
| 204935_at    | PTPN2     | 203   | 56   | -4 | 0.001902896 |
| 210715_s_at  | SPINT2    | 8752  | 2413 | -4 | 0.000769834 |
| 227265_at    |           | 31970 | 8840 | -4 | 0.009637502 |
| 205277_at    | PRDM2     | 1056  | 292  | -4 | 0.001259428 |
| 216971_s_at  | PLEC1     | 865   | 241  | -4 | 0.00304835  |
| 200897_s_at  | KIAA0992  | 12330 | 3440 | -4 | 0.00891048  |
| 238151_at    |           | 600   | 168  | -4 | 0.004681701 |
| 225802_at    | TOP1MT    | 832   | 232  | -4 | 0.007325634 |
| 222664_at    | KCTD15    | 211   | 59   | -4 | 0.009417062 |
| 211286_x_at  | CSF2RA    | 1975  | 552  | -4 | 0.00098869  |

|              |           |       |      |    |             |
|--------------|-----------|-------|------|----|-------------|
| 1556551_s_at | SLC39A6   | 1592  | 445  | -4 | 0.006361708 |
| 209190_s_at  | DIAPH1    | 5284  | 1480 | -4 | 0.003854828 |
| 1555460_a_at | SLC39A6   | 1424  | 399  | -4 | 0.007293101 |
| 220371_s_at  | SLC12A9   | 1279  | 359  | -4 | 0.001602402 |
| 229540_at    | RBPSUH    | 305   | 86   | -4 | 0.008593928 |
| 203063_at    | PPM1F     | 2340  | 659  | -4 | 0.007841297 |
| 220094_s_at  | C6orf79   | 8932  | 2522 | -4 | 0.00068589  |
| 223995_at    | SLC12A9   | 328   | 93   | -4 | 0.00170563  |
| 204861_s_at  | BIRC1     | 2522  | 716  | -4 | 0.007360483 |
| 1559051_s_at | C6orf150  | 591   | 168  | -4 | 0.004432885 |
| 211141_s_at  | CNOT3     | 88    | 25   | -4 | 0.005471004 |
| 213136_at    | PTPN2     | 6001  | 1709 | -4 | 0.005566052 |
| 217523_at    | CD44      | 1566  | 447  | -4 | 0.009417445 |
| 37384_at     | PPM1F     | 2688  | 767  | -4 | 0.002763007 |
| 214339_s_at  | MAP4K1    | 743   | 212  | -4 | 0.006440407 |
| 229373_at    |           | 919   | 263  | -4 | 0.001998902 |
| 210180_s_at  | SFRS10    | 704   | 201  | -4 | 0.005645908 |
| 243161_x_at  | ZFP42     | 43    | 12   | -3 | 0.004381983 |
| 205926_at    | IL27RA    | 1897  | 545  | -3 | 0.002301693 |
| 204089_x_at  | MAP3K4    | 2671  | 769  | -3 | 0.000968666 |
| 230261_at    | SIAT8D    | 4255  | 1229 | -3 | 0.00551322  |
| 214220_s_at  | ALMS1     | 804   | 233  | -3 | 0.004267368 |
| 226791_at    | KIFC2     | 1059  | 308  | -3 | 0.003022835 |
| 1560662_s_at | LOC339005 | 105   | 31   | -3 | 0.005307674 |
| 209916_at    | DHTKD1    | 1620  | 471  | -3 | 0.001500924 |
| 217992_s_at  | EFHD2     | 6183  | 1800 | -3 | 0.00096724  |
| 238449_at    |           | 840   | 245  | -3 | 0.00330017  |
| 225606_at    | BCL2L11   | 4403  | 1283 | -3 | 0.007078781 |
| 235461_at    | FLJ20032  | 640   | 187  | -3 | 0.003089977 |
| 239102_s_at  |           | 1004  | 293  | -3 | 0.008379074 |
| 242691_at    |           | 313   | 91   | -3 | 0.000816709 |
| 242549_at    | PRKCN     | 241   | 70   | -3 | 0.007322769 |
| 219690_at    | FLJ22573  | 4872  | 1425 | -3 | 0.009182408 |
| 227533_at    |           | 860   | 252  | -3 | 0.007114096 |
| 220918_at    | C21orf96  | 371   | 109  | -3 | 0.003848334 |
| 201729_s_at  | KIAA0100  | 11086 | 3260 | -3 | 0.000886409 |
| 203795_s_at  | BCL7A     | 560   | 165  | -3 | 0.001436039 |
| 203104_at    | CSF1R     | 22931 | 6773 | -3 | 0.001432348 |
| 1555214_a_at | CLECSF12  | 2663  | 787  | -3 | 0.008856178 |
| 229765_at    |           | 1081  | 321  | -3 | 0.003192049 |
| 225203_at    | PPP1R16A  | 993   | 295  | -3 | 0.002431169 |
| 228779_at    | MGC40489  | 173   | 51   | -3 | 0.002423411 |
| 223533_at    | AD158     | 2362  | 703  | -3 | 0.003908998 |
| 242970_at    | KIAA1463  | 214   | 64   | -3 | 0.004198819 |
| 1555756_a_at | CLECSF12  | 10700 | 3187 | -3 | 0.002064698 |
| 215764_x_at  | AP2A2     | 3464  | 1032 | -3 | 0.003110736 |
| 239519_at    |           | 1154  | 344  | -3 | 0.008895191 |
| 202810_at    | DRG1      | 2215  | 663  | -3 | 0.002198662 |
| 225796_at    | PXK       | 3893  | 1166 | -3 | 0.002182854 |
| 212056_at    | KIAA0182  | 1326  | 397  | -3 | 0.006474254 |
| 209191_at    | MGC4083   | 9906  | 2970 | -3 | 0.007119827 |
| 226056_at    | CDGAP     | 3005  | 903  | -3 | 0.006120152 |
| 222026_at    |           | 221   | 67   | -3 | 0.007841297 |
| 240013_at    |           | 403   | 121  | -3 | 0.006814616 |
| 1554966_a_at | DOC1      | 574   | 173  | -3 | 0.00777778  |
| 1565628_at   | LRRK1     | 260   | 78   | -3 | 0.004242416 |
| 204452_s_at  | FZD1      | 307   | 92   | -3 | 0.006477234 |
| 235203_at    |           | 445   | 134  | -3 | 0.000733609 |
| 225898_at    | FLJ12953  | 513   | 155  | -3 | 0.000680986 |
| 228003_at    | RAB30     | 628   | 190  | -3 | 0.006807425 |
| 203023_at    | HSPC111   | 656   | 200  | -3 | 0.000880882 |
| 216060_s_at  | DAAM1     | 1118  | 341  | -3 | 0.000699228 |
| 213669_at    | FCHO1     | 492   | 150  | -3 | 0.00854496  |
| 202088_at    | SLC39A6   | 13579 | 4152 | -3 | 0.006905313 |
| 227954_at    | LOC162073 | 1055  | 323  | -3 | 0.0044757   |
| 205052_at    | AUH       | 3622  | 1111 | -3 | 0.00322619  |
| 209347_s_at  | MAF       | 489   | 150  | -3 | 0.008879277 |
| 214221_at    | ALMS1     | 678   | 209  | -3 | 0.008016164 |
| 227333_at    |           | 965   | 298  | -3 | 0.004985182 |
| 219994_at    | APBB1IP   | 981   | 303  | -3 | 0.001665308 |
| 207511_s_at  | C2orf24   | 736   | 228  | -3 | 0.006649575 |
| 240037_at    | KIAA1754L | 754   | 233  | -3 | 0.008187628 |
| 1555974_a_at |           | 278   | 86   | -3 | 0.009669577 |
| 202624_s_at  | CABIN1    | 859   | 266  | -3 | 0.007156061 |
| 212161_at    | AP2A2     | 1321  | 411  | -3 | 0.008856178 |
| 226735_at    | FLJ90013  | 1174  | 366  | -3 | 0.002096506 |
| 201191_at    | PITPN     | 3381  | 1053 | -3 | 0.00132752  |
| 233271_at    |           | 578   | 180  | -3 | 0.004941434 |
| 230454_at    | ALS2CR15  | 274   | 85   | -3 | 0.007379561 |
| 1560327_at   |           | 4033  | 1267 | -3 | 0.006466231 |
| 241355_at    | HR        | 283   | 89   | -3 | 0.008519434 |
| 225234_at    | CBL       | 2884  | 910  | -3 | 0.006807425 |
| 229615_at    |           | 1086  | 343  | -3 | 0.002157051 |

|              |           |       |      |    |             |
|--------------|-----------|-------|------|----|-------------|
| 205127_at    | PTGS1     | 1146  | 363  | -3 | 0.006442451 |
| 1559591_s_at | CHDH      | 531   | 168  | -3 | 0.003021473 |
| 238446_at    | SMA5      | 1081  | 343  | -3 | 0.007897362 |
| 201332_s_at  | STAT6     | 1009  | 320  | -3 | 0.003412899 |
| 224892_at    | PLDN      | 20315 | 6445 | -3 | 0.00068589  |
| 203765_at    | GCA       | 5558  | 1764 | -3 | 0.003144705 |
| 235030_at    | MGC15606  | 613   | 195  | -3 | 0.001198287 |
| 236921_at    |           | 365   | 116  | -3 | 0.009605842 |
| 200601_at    | ACTN4     | 2630  | 837  | -3 | 0.00544888  |
| 228770_at    | GPR146    | 526   | 168  | -3 | 0.009982407 |
| 242008_at    |           | 938   | 300  | -3 | 0.009877341 |
| 226761_at    | ZNFN1A4   | 580   | 186  | -3 | 0.007322769 |
| 242677_at    | NRP1      | 917   | 294  | -3 | 0.006957134 |
| 228479_at    |           | 9752  | 3126 | -3 | 0.007032035 |
| 204544_at    | HPS5      | 7329  | 2354 | -3 | 0.008769158 |
| 228159_at    |           | 1843  | 592  | -3 | 0.005932966 |
| 227798_at    | MADH1     | 2413  | 777  | -3 | 0.002982382 |
| 242946_at    | CD53      | 761   | 246  | -3 | 0.001259428 |
| 208967_s_at  | AK2       | 3910  | 1263 | -3 | 0.002096506 |
| 202048_s_at  | CBX6      | 2333  | 754  | -3 | 0.00169621  |
| 228471_at    | LOC91526  | 2401  | 777  | -3 | 0.002375389 |
| 218768_at    | NUP107    | 3697  | 1197 | -3 | 0.008307009 |
| 1554918_a_at | ABCC4     | 496   | 161  | -3 | 0.006317168 |
| 212563_at    | BOP1      | 386   | 125  | -3 | 0.003968565 |
| 1569552_at   | PTPN18    | 107   | 35   | -3 | 0.00510575  |
| 228964_at    | PRDM1     | 3650  | 1184 | -3 | 0.00197542  |
| 216504_s_at  | SLC39A8   | 223   | 73   | -3 | 0.00891048  |
| 221840_at    | PTPRE     | 15321 | 4980 | -3 | 0.009116497 |
| 240232_at    |           | 789   | 257  | -3 | 0.005160543 |
| 223834_at    | PDCD1LG1  | 1230  | 401  | -3 | 0.001796904 |
| 227113_at    | ADHFE1    | 942   | 308  | -3 | 0.007146639 |
| 227807_at    |           | 660   | 215  | -3 | 0.003875337 |
| 213415_at    | CLIC2     | 10050 | 3292 | -3 | 0.001157292 |
| 219279_at    | DOCK10    | 6263  | 2053 | -3 | 0.007750988 |
| 223241_at    | SNX8      | 2455  | 805  | -3 | 0.004941434 |
| 217985_s_at  | BAZ1A     | 3945  | 1295 | -3 | 0.002757024 |
| 212218_s_at  | FBXO9     | 859   | 282  | -3 | 0.0079641   |
| 212640_at    | PTPLB     | 7161  | 2352 | -3 | 0.00239122  |
| 219582_at    | OGFRL1    | 3343  | 1099 | -3 | 0.002969263 |
| 213581_at    | PDCD2     | 1111  | 366  | -3 | 0.004283294 |
| 1569004_at   |           | 705   | 232  | -3 | 0.004508083 |
| 227367_at    | SLCO3A1   | 1039  | 343  | -3 | 0.002569456 |
| 224407_s_at  | MST4      | 467   | 154  | -3 | 0.002616922 |
| 200762_at    | DPYSL2    | 22252 | 7364 | -3 | 0.003022835 |
| 225171_at    | ARHGAP18  | 19590 | 6491 | -3 | 0.001665308 |
| 1556043_a_at |           | 297   | 99   | -3 | 0.004016141 |
| 235778_s_at  | LOC91526  | 380   | 127  | -3 | 0.003902297 |
| 219433_at    | BCOR      | 597   | 199  | -3 | 0.003599943 |
| 229690_at    | FLJ32356  | 560   | 187  | -3 | 0.005354131 |
| 1559882_at   | SAMHD1    | 278   | 93   | -3 | 0.0088515   |
| 227135_at    | ASAH1     | 12043 | 4037 | -3 | 0.004121848 |
| 1568619_s_at | LOC162073 | 3904  | 1309 | -3 | 0.003040067 |
| 203422_at    | POLD1     | 1526  | 512  | -3 | 0.002682218 |
| 1558710_at   |           | 198   | 67   | -3 | 0.006589381 |
| 202786_at    | STK39     | 680   | 229  | -3 | 0.008761105 |
| 201373_at    | PLEC1     | 1196  | 403  | -3 | 0.007070381 |
| 214011_s_at  | HSPC111   | 1316  | 444  | -3 | 0.003655871 |
| 240454_at    |           | 328   | 111  | -3 | 0.009656271 |
| 232521_at    | PCSK7     | 214   | 72   | -3 | 0.003133945 |
| 224190_x_at  | CARD4     | 690   | 234  | -3 | 0.001196518 |
| 1556165_at   |           | 202   | 69   | -3 | 0.003045581 |
| 205159_at    | CSF2RB    | 16708 | 5678 | -3 | 0.006047025 |
| 218734_at    | FLJ13848  | 734   | 249  | -3 | 0.002648674 |
| 227854_at    | FANCL     | 440   | 150  | -3 | 0.008111941 |
| 228008_at    |           | 641   | 218  | -3 | 0.005227771 |
| 211974_x_at  | RBPSUH    | 13692 | 4662 | -3 | 0.002270698 |
| 221073_s_at  | CARD4     | 1530  | 521  | -3 | 0.00189281  |
| 228521_s_at  | RAB4B     | 2547  | 870  | -3 | 0.006421072 |
| 208962_s_at  | FADS1     | 4449  | 1520 | -3 | 0.007081975 |
| 217856_at    | RBM8A     | 319   | 109  | -3 | 0.007836199 |
| 214765_s_at  | ASAH1     | 5788  | 1991 | -3 | 0.003290689 |
| 210091_s_at  | DTNA      | 142   | 49   | -3 | 0.009417062 |
| 213343_s_at  | PP1665    | 401   | 138  | -3 | 0.003919711 |
| 237772_at    |           | 399   | 138  | -3 | 0.009092042 |
| 205282_at    | LRP8      | 709   | 245  | -3 | 0.003246613 |
| 238822_at    |           | 159   | 55   | -3 | 0.004283294 |
| 208873_s_at  | DP1       | 11863 | 4117 | -3 | 0.003424721 |
| 1558517_s_at |           | 775   | 269  | -3 | 0.004137533 |
| 237097_at    | SPTBN5    | 427   | 148  | -3 | 0.001858679 |
| 213521_at    | PTPN18    | 1924  | 670  | -3 | 0.008790051 |
| 204129_at    | BCL9      | 280   | 98   | -3 | 0.003320727 |
| 213514_s_at  | DIAPH1    | 750   | 262  | -3 | 0.002111479 |
| 221991_at    | NXPB3     | 303   | 106  | -3 | 0.002215678 |

|              |             |       |       |    |             |
|--------------|-------------|-------|-------|----|-------------|
| 226666_at    | DAAM1       | 847   | 295   | -3 | 0.007656412 |
| 203258_at    | DRAP1       | 1870  | 653   | -3 | 0.000880882 |
| 37652_at     | CABIN1      | 1432  | 501   | -3 | 0.00256131  |
| 201697_s_at  | DNMT1       | 8108  | 2837  | -3 | 0.00174584  |
| 200788_s_at  | PEA15       | 21059 | 7377  | -3 | 0.002541818 |
| 210950_s_at  | FDFT1       | 4681  | 1641  | -3 | 0.009473408 |
| 200070_at    | C2orf24     | 2940  | 1031  | -3 | 0.005418292 |
| 213465_s_at  | PPP1R7      | 11885 | 4176  | -3 | 0.007261861 |
| 1558896_at   |             | 179   | 63    | -3 | 0.007008551 |
| 225567_at    |             | 3828  | 1353  | -3 | 0.000729527 |
| 1552303_a_at | MGC20235    | 1410  | 499   | -3 | 0.004616654 |
| 235765_at    | TLE4        | 285   | 101   | -3 | 0.007005649 |
| 203718_at    | NTE         | 3886  | 1379  | -3 | 0.000594099 |
| 228568_at    | Gup1        | 829   | 294   | -3 | 0.003282946 |
| 222941_at    | FLJ11850    | 102   | 36    | -3 | 0.006814616 |
| 201613_s_at  | RUVBL1      | 2328  | 828   | -3 | 0.009041432 |
| 214783_s_at  | ANXA11      | 2185  | 778   | -3 | 0.003110736 |
| 219696_at    | FLJ20054    | 6852  | 2444  | -3 | 0.007314809 |
| 234068_s_at  | AP2A1       | 417   | 149   | -3 | 0.007479019 |
| 235803_at    |             | 474   | 170   | -3 | 0.003607736 |
| 222075_s_at  | OAZ3        | 520   | 186   | -3 | 0.007300438 |
| 219431_at    | ARHGAP10    | 2048  | 734   | -3 | 0.001196518 |
| 202611_s_at  | CRSP2       | 843   | 304   | -3 | 0.004720117 |
| 225212_at    | SLC25A25    | 621   | 224   | -3 | 0.002854658 |
| 221293_s_at  | DEF6        | 395   | 143   | -3 | 0.007683664 |
| 206411_s_at  | ABL2        | 474   | 172   | -3 | 0.003657126 |
| 201746_at    | TP53        | 1558  | 566   | -3 | 0.00068589  |
| 230836_at    | SIAT8D      | 5001  | 1819  | -3 | 0.006240688 |
| 226456_at    | MGC24665    | 751   | 274   | -3 | 0.002050574 |
| 227792_at    |             | 9831  | 3583  | -3 | 0.004673886 |
| 232072_at    | ASAH1       | 728   | 266   | -3 | 0.008630009 |
| 236077_at    | GANC        | 644   | 235   | -3 | 0.005160543 |
| 232543_x_at  | ARHGAP9     | 3879  | 1419  | -3 | 0.003535962 |
| 204438_at    | MRC1        | 38223 | 13989 | -3 | 0.00148951  |
| 1557987_at   |             | 2282  | 836   | -3 | 0.006684733 |
| 201190_s_at  | PITPN       | 5778  | 2117  | -3 | 0.002235963 |
| 236552_at    |             | 318   | 117   | -3 | 0.006028453 |
| 213189_at    | MINA        | 1099  | 403   | -3 | 0.008974097 |
| 1554406_a_at | CLECSF12    | 3837  | 1408  | -3 | 0.006623916 |
| 240064_at    |             | 1073  | 394   | -3 | 0.009364322 |
| 1558953_s_at | KIAA1052    | 1439  | 529   | -3 | 0.009762065 |
| 231848_x_at  | ZNF207      | 2098  | 771   | -3 | 0.001030236 |
| 217728_at    | S100A6      | 37079 | 13638 | -3 | 0.002949592 |
| 244417_at    |             | 351   | 129   | -3 | 0.00187317  |
| 224734_at    | HMGB1       | 2339  | 861   | -3 | 0.001573025 |
| 222825_at    | CGI-77      | 1546  | 570   | -3 | 0.000886409 |
| 227624_at    | KIAA1546    | 2810  | 1036  | -3 | 0.003276777 |
| 235240_at    | MJD         | 637   | 235   | -3 | 0.004982975 |
| 1555896_a_at | ADAM15      | 1071  | 395   | -3 | 0.001511555 |
| 1562033_at   |             | 177   | 65    | -3 | 0.003434945 |
| 1563641_a_at | SLIC1       | 409   | 152   | -3 | 0.001393737 |
| 228157_at    | ZNF207      | 2246  | 836   | -3 | 0.004409269 |
| 216603_at    | SLC7A8      | 1488  | 555   | -3 | 0.00263153  |
| 208765_s_at  | HNRPR       | 3632  | 1355  | -3 | 0.005832639 |
| 216811_at    |             | 233   | 87    | -3 | 0.002794001 |
| 208018_s_at  | HCK         | 12040 | 4497  | -3 | 0.002907709 |
| 224924_at    | TTC7        | 600   | 225   | -3 | 0.004192633 |
| 1554487_a_at | CREBL1      | 204   | 76    | -3 | 0.005160543 |
| 201213_at    | PPP1R7      | 855   | 321   | -3 | 0.008429267 |
| 201247_at    | SREBF2      | 1418  | 535   | -3 | 0.004762464 |
| 219801_at    | ZNF34       | 421   | 159   | -3 | 0.005029763 |
| 228032_s_at  |             | 3152  | 1193  | -3 | 0.009811617 |
| 212320_at    | OK/SW-cl.56 | 13522 | 5125  | -3 | 0.002960477 |
| 235009_at    | FLJ33215    | 518   | 196   | -3 | 0.004791566 |
| 219810_at    | VCIP135     | 412   | 157   | -3 | 0.007932386 |
| 226496_at    | ZCCHC7      | 2588  | 984   | -3 | 0.002183623 |
| 236908_at    |             | 218   | 83    | -3 | 0.003225261 |
| 219563_at    | C14orf139   | 2963  | 1132  | -3 | 0.003649189 |
| 242726_at    | ACSL3       | 284   | 109   | -3 | 0.00556148  |
| 214438_at    | HLX1        | 2932  | 1123  | -3 | 0.008311074 |
| 206709_x_at  | GPT         | 303   | 117   | -3 | 0.003613072 |
| 224872_at    | KIAA1463    | 3772  | 1451  | -3 | 0.001969869 |
| 232908_at    | KIAA1240    | 211   | 81    | -3 | 0.004341633 |
| 219678_x_at  | DCLRE1C     | 1976  | 760   | -3 | 0.004738807 |
| 225748_at    | C6orf93     | 1638  | 631   | -3 | 0.002969263 |
| 213571_s_at  | EIF4EL3     | 4107  | 1582  | -3 | 0.00604506  |
| 214040_s_at  | GSN         | 3448  | 1329  | -3 | 0.006104243 |
| 230376_at    |             | 416   | 160   | -3 | 0.003706491 |
| 217966_s_at  | C1orf24     | 2904  | 1121  | -3 | 0.00854467  |
| 207455_at    | P2RY1       | 178   | 69    | -3 | 0.002949592 |
| 204789_at    | FMNL1       | 1077  | 416   | -3 | 0.004174624 |
| 222479_s_at  | DNCL1       | 2497  | 967   | -3 | 0.003955027 |
| 218979_at    | C9orf76     | 1885  | 730   | -3 | 0.003313997 |

|              |             |       |       |    |             |
|--------------|-------------|-------|-------|----|-------------|
| 224840_at    | FKBP5       | 5464  | 2122  | -3 | 0.004502603 |
| 223766_at    | MRIP2       | 391   | 152   | -3 | 0.006029503 |
| 1552263_at   | MAPK1       | 2011  | 782   | -3 | 0.00771811  |
| 231431_s_at  |             | 2569  | 999   | -3 | 0.00196172  |
| 1563075_s_at |             | 270   | 105   | -3 | 0.009596384 |
| 225569_at    | EIF2C2      | 1536  | 599   | -3 | 0.008595163 |
| 214949_at    |             | 2687  | 1048  | -3 | 0.004713533 |
| 224923_at    | TTC7        | 1410  | 551   | -3 | 0.002077834 |
| 214948_s_at  |             | 2511  | 983   | -3 | 0.00739293  |
| 221727_at    | PC4         | 1258  | 494   | -3 | 0.00478907  |
| 207760_s_at  | NCOR2       | 9081  | 3568  | -3 | 0.004593346 |
| 225666_at    | FLJ14624    | 683   | 268   | -3 | 0.006519674 |
| 224856_at    | FKBP5       | 1917  | 755   | -3 | 0.009852749 |
| 218530_at    | FHOD1       | 1831  | 723   | -3 | 0.002053372 |
| 91703_at     | DKFZp762C18 | 1179  | 466   | -3 | 0.007135774 |
| 228760_at    | SRP46       | 622   | 246   | -3 | 0.003424721 |
| 229676_at    | PAPD1       | 1058  | 420   | -3 | 0.006010837 |
| 218499_at    | MST4        | 2349  | 931   | -3 | 0.002512863 |
| 238005_s_at  | MAN2C1      | 716   | 284   | -3 | 0.005673066 |
| 235159_at    |             | 367   | 146   | -3 | 0.008829548 |
| 226641_at    | LOC91526    | 4903  | 1950  | -3 | 0.001436039 |
| 212495_at    | JMJD2B      | 597   | 238   | -3 | 0.004929364 |
| 213385_at    | CHN2        | 2249  | 898   | -3 | 0.00444683  |
| 217762_s_at  | RAB31       | 16938 | 6764  | -3 | 0.006298226 |
| 213746_s_at  | FLNA        | 5764  | 2302  | -3 | 0.008145078 |
| 226706_at    | FLJ23867    | 267   | 107   | -3 | 0.006861068 |
| 202941_at    | NDUFV2      | 11181 | 4476  | -2 | 0.005503035 |
| 221605_s_at  | PIPOX       | 789   | 316   | -2 | 0.007358791 |
| 226336_at    | PPIA        | 2998  | 1202  | -2 | 0.002567713 |
| 225618_at    | LOC201176   | 919   | 370   | -2 | 0.003708692 |
| 210649_s_at  | ARID1A      | 1498  | 603   | -2 | 0.00169621  |
| 203232_s_at  | SCA1        | 7303  | 2957  | -2 | 0.001450692 |
| 204067_at    | SUOX        | 1728  | 700   | -2 | 0.002342079 |
| 205251_at    | PER2        | 1142  | 464   | -2 | 0.002704743 |
| 1563549_a_at | KIAA1623    | 383   | 155   | -2 | 0.008490797 |
| 240899_at    |             | 191   | 78    | -2 | 0.003805206 |
| 223223_at    | ARV1        | 3782  | 1538  | -2 | 0.003198796 |
| 221059_s_at  | CHST6       | 16093 | 6547  | -2 | 0.001393737 |
| 201079_at    | SYNGR2      | 12916 | 5265  | -2 | 0.007264401 |
| 201018_at    | EIF1AX      | 1754  | 715   | -2 | 0.006047025 |
| 221764_at    | C19orf22    | 1290  | 527   | -2 | 0.007633727 |
| 212662_at    | PVR         | 382   | 156   | -2 | 0.00577379  |
| 204998_s_at  | ATF5        | 1517  | 621   | -2 | 0.006519674 |
| 216604_s_at  | SLC7A8      | 4740  | 1944  | -2 | 0.003935433 |
| 241709_s_at  | DOCK1       | 218   | 90    | -2 | 0.008259032 |
| 201644_at    | TSTA3       | 760   | 313   | -2 | 0.00407849  |
| 227523_s_at  | CGI-72      | 1189  | 489   | -2 | 0.004791566 |
| 201378_s_at  | NICE-4      | 2803  | 1154  | -2 | 0.003788429 |
| 203761_at    | SLA         | 12325 | 5076  | -2 | 0.009187683 |
| 242229_at    | NAPE-PLD    | 187   | 77    | -2 | 0.008630009 |
| 227842_at    | RAB30       | 162   | 67    | -2 | 0.006215516 |
| 229074_at    | EHD4        | 5104  | 2105  | -2 | 0.009324125 |
| 231369_at    | ZNF333      | 169   | 70    | -2 | 0.003806407 |
| 217809_at    | BZW2        | 4346  | 1794  | -2 | 0.003375791 |
| 205423_at    | AP1B1       | 4226  | 1747  | -2 | 0.002818185 |
| 200653_s_at  | CALM1       | 16278 | 6734  | -2 | 0.006267335 |
| 205345_at    | BARD1       | 362   | 150   | -2 | 0.003225438 |
| 238929_at    | SRP46       | 235   | 97    | -2 | 0.004525871 |
| 225647_s_at  | CTSC        | 47267 | 19589 | -2 | 0.004220445 |
| 200990_at    | TRIM28      | 4372  | 1815  | -2 | 0.004432414 |
| 1553979_at   |             | 3112  | 1295  | -2 | 0.005029763 |
| 200051_at    | SART1       | 1772  | 738   | -2 | 0.005401299 |
| 217627_at    | ZNF573      | 644   | 269   | -2 | 0.006519674 |
| 222037_at    | MCM4        | 190   | 79    | -2 | 0.009735246 |
| 215375_x_at  |             | 280   | 117   | -2 | 0.004761857 |
| 1570571_at   | FLJ11088    | 184   | 77    | -2 | 0.005799825 |
| 204976_s_at  | AMMECR1     | 760   | 318   | -2 | 0.006649942 |
| 225099_at    | LOC200933   | 1736  | 728   | -2 | 0.002530654 |
| 223174_at    | GMRP-1      | 1757  | 738   | -2 | 0.006826238 |
| 218322_s_at  | ACSL5       | 1785  | 750   | -2 | 0.006010837 |
| 1564031_a_at | CSorf16     | 475   | 200   | -2 | 0.005645908 |
| 201214_s_at  | PPP1R7      | 5588  | 2358  | -2 | 0.008974097 |
| 1558719_s_at | MGC4189     | 135   | 57    | -2 | 0.009001202 |
| 201605_x_at  | CNN2        | 1593  | 675   | -2 | 0.007608222 |
| 1552264_a_at | MAPK1       | 2553  | 1084  | -2 | 0.004530935 |
| 48612_at     | FLJ31821    | 2526  | 1073  | -2 | 0.001408079 |
| 226629_at    | MGC34680    | 698   | 297   | -2 | 0.008666091 |
| 234210_x_at  |             | 594   | 252   | -2 | 0.006255972 |
| 216109_at    | THRAP2      | 261   | 111   | -2 | 0.009410461 |
| 217976_s_at  | DNCL1       | 3028  | 1290  | -2 | 0.003478673 |
| 205090_s_at  | NAGPA       | 5858  | 2496  | -2 | 0.003940512 |
| 224583_at    | COTL1       | 9319  | 3971  | -2 | 0.007188018 |
| 214030_at    | DKFZp667G21 | 2274  | 970   | -2 | 0.00590369  |



|              |             |       |       |    |             |
|--------------|-------------|-------|-------|----|-------------|
| 207621_s_at  | PEMT        | 708   | 302   | -2 | 0.008206727 |
| 211921_x_at  | PTMA        | 26137 | 11167 | -2 | 0.005902598 |
| 201127_s_at  | ACLY        | 1015  | 435   | -2 | 0.007500606 |
| 203580_s_at  | SLC7A6      | 1432  | 613   | -2 | 0.005643994 |
| 201209_at    | HDAC1       | 4370  | 1873  | -2 | 0.003537228 |
| 225112_at    | ABI2        | 485   | 208   | -2 | 0.003478673 |
| 215823_x_at  | PABPC1      | 35375 | 15169 | -2 | 0.008505284 |
| 209083_at    | CORO1A      | 1695  | 728   | -2 | 0.007194248 |
| 227016_at    | LOC157697   | 515   | 221   | -2 | 0.007907549 |
| 201487_at    | CTSC        | 48482 | 20833 | -2 | 0.007918301 |
| 206050_s_at  | RNH         | 11821 | 5081  | -2 | 0.006003964 |
| 207785_s_at  | RBPSUH      | 8212  | 3531  | -2 | 0.004254351 |
| 221876_at    | DKFZp762P21 | 377   | 162   | -2 | 0.004052912 |
| 217653_x_at  |             | 647   | 279   | -2 | 0.007281685 |
| 227143_s_at  | BID         | 3342  | 1443  | -2 | 0.008091899 |
| 236072_at    | ATAD1       | 205   | 89    | -2 | 0.009324371 |
| 221514_at    | UTP14A      | 955   | 413   | -2 | 0.002183623 |
| 225545_at    | EEF2K       | 4140  | 1789  | -2 | 0.003320727 |
| 226707_at    | PP3856      | 1029  | 445   | -2 | 0.003144705 |
| 1560228_at   | SNAI3       | 748   | 324   | -2 | 0.005756152 |
| 207198_s_at  | LIMS1       | 8144  | 3523  | -2 | 0.004166632 |
| 225098_at    | ABI2        | 573   | 248   | -2 | 0.008067323 |
| 236809_at    |             | 509   | 220   | -2 | 0.009214693 |
| 233385_x_at  | RAB4B       | 1730  | 750   | -2 | 0.007674838 |
| 211043_s_at  | CLTB        | 2888  | 1254  | -2 | 0.006013433 |
| 214714_at    | ZNF394      | 1689  | 734   | -2 | 0.009508188 |
| 201797_s_at  | VARS2       | 925   | 403   | -2 | 0.002513787 |
| 226906_s_at  | ARHGAP9     | 1536  | 670   | -2 | 0.005160543 |
| 225624_at    | LOC92017    | 3198  | 1396  | -2 | 0.008123281 |
| 211951_at    | NOLC1       | 2538  | 1112  | -2 | 0.003198796 |
| 223875_s_at  | EPC1        | 157   | 69    | -2 | 0.00985653  |
| 224451_x_at  | ARHGAP9     | 6409  | 2818  | -2 | 0.006029503 |
| 235788_at    | TRIM26      | 245   | 108   | -2 | 0.007188472 |
| 217763_s_at  | RAB31       | 18443 | 8114  | -2 | 0.008879277 |
| 219349_s_at  | SEC5L1      | 1250  | 552   | -2 | 0.003761106 |
| 224811_at    |             | 4953  | 2186  | -2 | 0.007264401 |
| 226215_s_at  | FBXL10      | 4386  | 1936  | -2 | 0.003320727 |
| 228638_at    | MGC34648    | 1577  | 696   | -2 | 0.007335105 |
| 241159_x_at  |             | 105   | 47    | -2 | 0.008164204 |
| 209082_s_at  | COL18A1     | 272   | 120   | -2 | 0.006157835 |
| 213387_at    | KIAA1240    | 1077  | 478   | -2 | 0.00516232  |
| 206284_x_at  | CLTB        | 2016  | 895   | -2 | 0.007554873 |
| 201589_at    | SMC1L1      | 5801  | 2583  | -2 | 0.007032035 |
| 222592_s_at  | ACSL5       | 2718  | 1211  | -2 | 0.004101494 |
| 209615_s_at  | PAK1        | 1043  | 465   | -2 | 0.009852749 |
| 208152_s_at  | DDX21       | 4408  | 1972  | -2 | 0.005440666 |
| 201377_at    | NICE-4      | 3438  | 1541  | -2 | 0.002111779 |
| 205512_s_at  | PDCD8       | 3578  | 1606  | -2 | 0.005642256 |
| 221842_s_at  | ZNF131      | 1473  | 661   | -2 | 0.005413155 |
| 230490_x_at  | RSU1        | 1262  | 567   | -2 | 0.006807425 |
| 202816_s_at  | SS18        | 600   | 269   | -2 | 0.006551574 |
| 201017_at    | EIF1AX      | 1645  | 741   | -2 | 0.0084068   |
| 204093_at    | CCNH        | 5484  | 2476  | -2 | 0.007032035 |
| 206445_s_at  | HRMT1L2     | 2135  | 966   | -2 | 0.008429267 |
| 226156_at    | AKT2        | 403   | 182   | -2 | 0.006550021 |
| 201934_at    | PRO2730     | 7841  | 3549  | -2 | 0.003571917 |
| 50314_i_at   | C20orf27    | 803   | 364   | -2 | 0.006681813 |
| 201991_s_at  | KIF5B       | 10756 | 4877  | -2 | 0.004121848 |
| 222149_x_at  | DKFZp434P16 | 713   | 324   | -2 | 0.009605842 |
| 1552937_s_at | TREX1       | 237   | 108   | -2 | 0.006406917 |
| 208121_s_at  | PTPRO       | 7640  | 3474  | -2 | 0.007581555 |
| 209717_at    | EVI5        | 2213  | 1008  | -2 | 0.002198662 |
| 201844_s_at  | RYBP        | 2854  | 1300  | -2 | 0.006160639 |
| 233575_s_at  | TLE4        | 294   | 134   | -2 | 0.008242819 |
| 221575_at    | SCLY        | 898   | 410   | -2 | 0.007786356 |
| 233970_s_at  | CGI-09      | 689   | 315   | -2 | 0.00590369  |
| 213090_s_at  | TAF4        | 1671  | 765   | -2 | 0.00323052  |
| 1569536_at   | C14orf58    | 215   | 98    | -2 | 0.009420785 |
| 234140_s_at  | STIM2       | 1259  | 576   | -2 | 0.008080759 |
| 212687_at    | LIMS1       | 24700 | 11327 | -2 | 0.00264528  |
| 217862_at    | PIAS1       | 2152  | 988   | -2 | 0.00781418  |
| 36936_at     | TSTA3       | 1393  | 640   | -2 | 0.007107697 |
| 224784_at    | MLLT6       | 1787  | 825   | -2 | 0.002831008 |
| 218810_at    | FLJ23231    | 656   | 303   | -2 | 0.00774237  |
| 225764_at    | ETV6        | 2750  | 1271  | -2 | 0.006003964 |
| 242458_at    | RALGPS2     | 139   | 64    | -2 | 0.009195093 |
| 202039_at    | TIAF1       | 2588  | 1199  | -2 | 0.004354621 |
| 238829_at    | FLJ21439    | 228   | 105   | -2 | 0.004121848 |
| 225405_at    | DKFZp762N15 | 5068  | 2348  | -2 | 0.005185755 |
| 208430_s_at  | DTNA        | 234   | 108   | -2 | 0.002198662 |
| 203826_s_at  | PITPNM1     | 417   | 194   | -2 | 0.006764764 |
| 227152_at    | FLJ20696    | 593   | 277   | -2 | 0.00705941  |
| 200613_at    | AP2M1       | 17253 | 8071  | -2 | 0.002530654 |

|              |             |       |       |    |             |
|--------------|-------------|-------|-------|----|-------------|
| 218474_s_at  | KCTD5       | 2808  | 1314  | -2 | 0.006671772 |
| 219807_x_at  | RAB4B       | 1578  | 739   | -2 | 0.009710361 |
| 1557996_at   |             | 756   | 354   | -2 | 0.008150444 |
| 212186_at    | ACACA       | 1054  | 493   | -2 | 0.006589381 |
| 201360_at    | CST3        | 60925 | 28526 | -2 | 0.004788511 |
| 209393_s_at  | EIF4EL3     | 2584  | 1215  | -2 | 0.00577379  |
| 222589_at    | NLK         | 1710  | 805   | -2 | 0.008253096 |
| 214181_x_at  | LST1        | 5128  | 2414  | -2 | 0.009826003 |
| 201321_s_at  | SMARCC2     | 2036  | 959   | -2 | 0.007032035 |
| 212743_at    | RCHY1       | 209   | 98    | -2 | 0.005460784 |
| 235585_at    |             | 165   | 78    | -2 | 0.00285357  |
| 1552628_a_at | FLJ22313    | 3823  | 1805  | -2 | 0.001688076 |
| 238856_s_at  |             | 490   | 232   | -2 | 0.005925175 |
| 210125_s_at  | BANF1       | 5421  | 2563  | -2 | 0.007078781 |
| 212738_at    | ARHGAP19    | 753   | 356   | -2 | 0.009494326 |
| 211013_x_at  | PML         | 374   | 177   | -2 | 0.007078781 |
| 213135_at    | TIAM1       | 6080  | 2885  | -2 | 0.003476818 |
| 217659_at    |             | 108   | 51    | -2 | 0.00374596  |
| 203159_at    | GLS         | 4415  | 2099  | -2 | 0.003533478 |
| 218019_s_at  | C21orf97    | 6836  | 3266  | -2 | 0.009827976 |
| 219392_x_at  | FLJ11029    | 1795  | 858   | -2 | 0.007032035 |
| 230350_at    |             | 793   | 379   | -2 | 0.007489776 |
| 207761_s_at  | DKFZP586A05 | 15251 | 7303  | -2 | 0.009353198 |
| 205745_x_at  | ADAM17      | 1226  | 590   | -2 | 0.005295622 |
| 206991_s_at  | CCR5        | 5279  | 2540  | -2 | 0.005259381 |
| 211984_at    | CALM1       | 7038  | 3389  | -2 | 0.005044173 |
| 212085_at    | SLC25A6     | 18407 | 8866  | -2 | 0.008011405 |
| 223057_s_at  | XPO5        | 546   | 264   | -2 | 0.007683664 |
| 214427_at    | NOL1        | 1128  | 546   | -2 | 0.002609501 |
| 214574_x_at  | LST1        | 6655  | 3227  | -2 | 0.008150444 |
| 210260_s_at  | TNFAIP8     | 9570  | 4641  | -2 | 0.004832781 |
| 224731_at    | HMGB1       | 14536 | 7054  | -2 | 0.005776524 |
| 219178_at    | QTRTD1      | 806   | 392   | -2 | 0.007753526 |
| 202153_s_at  | NUP62       | 4269  | 2082  | -2 | 0.007897362 |
| 200696_s_at  | GSN         | 19431 | 9478  | -2 | 0.009473408 |
| 203057_s_at  | PRDM2       | 2673  | 1304  | -2 | 0.006497498 |
| 208578_at    | SCN10A      | 141   | 69    | -2 | 0.006593858 |
| 238722_x_at  | NAPE-PLD    | 376   | 184   | -2 | 0.004596465 |
| 229333_at    |             | 571   | 279   | -2 | 0.004515688 |
| 218216_x_at  | ARL6IP4     | 3092  | 1514  | -2 | 0.003524778 |
| 217622_at    | C22orf3     | 275   | 135   | -2 | 0.009684815 |
| 236248_x_at  | MGC21874    | 1818  | 892   | -2 | 0.0088515   |
| 221513_s_at  | UTP14A      | 674   | 331   | -2 | 0.002111779 |
| 212057_at    | KIAA0182    | 1662  | 819   | -2 | 0.008683126 |
| 203442_x_at  | FLJ35827    | 810   | 400   | -2 | 0.003417005 |
| 214251_s_at  | NUMA1       | 286   | 141   | -2 | 0.007078781 |
| 1559397_s_at | MGC3121     | 559   | 276   | -2 | 0.006255972 |
| 203660_s_at  | PCNT2       | 1156  | 572   | -2 | 0.007005649 |
| 221799_at    | CSGlcA-T    | 801   | 397   | -2 | 0.007841297 |
| 200036_s_at  | RPL10A      | 15605 | 7724  | -2 | 0.004673886 |
| 209563_x_at  | CALM1       | 20690 | 10251 | -2 | 0.006169334 |
| 225439_at    | CML66       | 1136  | 564   | -2 | 0.00329417  |
| 226987_at    | HUMAGCGB    | 565   | 280   | -2 | 0.006565255 |
| 207740_s_at  | NUP62       | 927   | 461   | -2 | 0.005926796 |
| 227357_at    | TAB3        | 2716  | 1353  | -2 | 0.00544888  |
| 227516_at    |             | 744   | 371   | -2 | 0.009605842 |
| 203040_s_at  | HMBS        | 1021  | 509   | -2 | 0.004832907 |
| 230925_at    | APBB1IP     | 14748 | 7362  | -2 | 0.006022753 |
| 231870_s_at  | CGI-07      | 8394  | 4192  | -2 | 0.007188472 |
| 201937_s_at  | DNPEP       | 1460  | 729   | -2 | 0.004981991 |
| 38703_at     | DNPEP       | 3527  | 1763  | -2 | 0.002922856 |
| 241699_at    |             | 99    | 50    | -2 | 0.007897362 |

## Supplemental Table 2

70 genes belonging to the lipid-related pathways and significantly upregulated in DC-17 compared to DC

The fold change DC-17/DC was calculated from the mean expression in DC-17 (n=5) and DC (n=4).

Statistical analysis was performed using LIMMA and correction for multiple comparisons was done using the Benjamini-Hochberg (BH) method.

| probeset     | gene symbol | Gene Name                                                                                                                      | DC<br>(mean<br>expression) | DC<br>(standard<br>deviation) | DC-17<br>(mean<br>expression) | DC-17<br>(standard<br>deviation) | fold-change<br>DC-17/DC | BH corrected p<br>values |
|--------------|-------------|--------------------------------------------------------------------------------------------------------------------------------|----------------------------|-------------------------------|-------------------------------|----------------------------------|-------------------------|--------------------------|
| 211748_x_at  | PTGDS       | prostaglandin D2 synthase, hematopoietic;                                                                                      | 219                        | 41                            | 31871                         | 9162                             | 146                     | 0.0000946                |
| 212884_x_at  | APOE        | prostaglandin D2 synthase 21kDa (brain)                                                                                        | 725                        | 618                           | 35527                         | 7100                             | 49                      | 0.000178367              |
| 207092_at    | LEP         | hypothetical LOC100129500; apolipoprotein E                                                                                    | 5                          | 2                             | 196                           | 184                              | 40                      | 0.002924826              |
| 213553_x_at  | APOC1       | leptin                                                                                                                         | 1107                       | 1334                          | 43123                         | 11867                            | 39                      | 0.003854828              |
| 203979_at    | CYP27A1     | apolipoprotein C-II                                                                                                            | 273                        | 232                           | 10520                         | 1104                             | 39                      | 0.000418667              |
| 208792_s_at  | CLU         | cytochrome P450, family 27, subfamily A,<br>polypeptide 1                                                                      | 151                        | 35                            | 4454                          | 2000                             | 29                      | 0.000121206              |
| 218922_s_at  | LASS4       | clusterin                                                                                                                      | 6                          | 1                             | 166                           | 71                               | 28                      | 0.000113064              |
| 202575_at    | CRABP2      | LAG1 homolog, ceramide synthase 4                                                                                              | 647                        | 934                           | 13916                         | 10024                            | 22                      | 0.005536467              |
| 203920_at    | NR1H3       | cellular retinoic acid binding protein 2                                                                                       | 414                        | 316                           | 8599                          | 3457                             | 21                      | 0.000702631              |
| 211026_s_at  | MGLL        | nuclear receptor subfamily 1, group H, member 3                                                                                | 666                        | 436                           | 7799                          | 1620                             | 12                      | 0.000991999              |
| 223432_at    | OSBP2       | monoglyceride lipase                                                                                                           | 17                         | 7                             | 175                           | 104                              | 11                      | 0.009943016              |
| 204561_x_at  | APOC2       | oxysterol binding protein 2                                                                                                    | 783                        | 650                           | 8095                          | 4286                             | 10                      | 0.003417005              |
| 203423_at    | RBP1        | apolipoprotein C-II                                                                                                            | 154                        | 90                            | 1433                          | 460                              | 9                       | 0.00197542               |
| 202481_at    | DHRS3       | retinol binding protein 1, cellular                                                                                            | 203                        | 146                           | 1865                          | 621                              | 9                       | 0.001873443              |
| 223952_x_at  | DHRS9       | dehydrogenase/reductase (SDR family) member 3                                                                                  | 509                        | 521                           | 4517                          | 2390                             | 9                       | 0.008893325              |
| 209785_s_at  | PLA2G4C     | dehydrogenase/reductase (SDR family) member 9                                                                                  | 324                        | 338                           | 2730                          | 879                              | 8                       | 0.004538949              |
| 209122_at    | PLIN2       | phospholipase A2, group IVC (cytosolic, calcium-<br>independent)                                                               | 1808                       | 681                           | 14885                         | 5347                             | 8                       | 0.000789183              |
| 225847_at    | KIAA1363    | Perilipin 2                                                                                                                    | 950                        | 922                           | 7426                          | 1463                             | 8                       | 0.004941434              |
| 210942_s_at  | SIAT10      | arylacetamide deacetylase-like 1                                                                                               | 275                        | 178                           | 2061                          | 412                              | 8                       | 0.001301147              |
| 1555416_a_at | ALOX15B     | ST3 beta-galactoside alpha-2,3-sialyltransferase 6                                                                             | 63                         | 15                            | 439                           | 262                              | 7                       | 0.004991179              |
| 218099_at    | HT008       | arachidonate 15-lipoxygenase, type B                                                                                           | 742                        | 153                           | 5003                          | 1727                             | 7                       | 0.00068589               |
| 205934_at    | PLCL1       | testis expressed 2                                                                                                             | 270                        | 135                           | 1788                          | 841                              | 7                       | 0.004616654              |
| 228713_s_at  | DHRS10      | phospholipase C-like 1                                                                                                         | 201                        | 71                            | 1238                          | 448                              | 6                       | 0.002512934              |
| 238524_at    | CEPT1       | hydroxysteroid (17-beta) dehydrogenase 14                                                                                      | 137                        | 103                           | 840                           | 172                              | 6                       | 0.002949592              |
| 235678_at    | GM2A        | choline/ethanolamine phosphotransferase 1                                                                                      | 3285                       | 2814                          | 18962                         | 5607                             | 6                       | 0.008308494              |
| 227379_at    | OACT1       | GM2 ganglioside activator                                                                                                      | 285                        | 144                           | 1601                          | 899                              | 6                       | 0.005221138              |
| 201050_at    | PLD3        | membrane bound O-acyltransferase domain<br>containing 1                                                                        | 3941                       | 3361                          | 21463                         | 2991                             | 5                       | 0.003592879              |
| 200785_s_at  | LRP1        | phospholipase D family, member 3                                                                                               | 463                        | 368                           | 2436                          | 806                              | 5                       | 0.005223228              |
| 220675_s_at  | C22orf20    | low density lipoprotein-related protein 1 (alpha-2-<br>macroglobulin receptor)                                                 | 45                         | 13                            | 182                           | 37                               | 4                       | 0.001234206              |
| 207275_s_at  | ACSL1       | patatin-like phospholipase domain containing 3                                                                                 | 1368                       | 590                           | 5473                          | 486                              | 4                       | 0.001342889              |
| 1552637_at   | PTPN11      | acyl-CoA synthetase long-chain family member 1                                                                                 | 12                         | 4                             | 47                            | 9                                | 4                       | 0.001544668              |
| 208771_s_at  | LTA4H       | protein tyrosine phosphatase, non-receptor type<br>11; similar to protein tyrosine phosphatase, non-<br>receptor type 11       | 4728                       | 716                           | 17889                         | 3425                             | 4                       | 0.000684189              |
| 203505_at    | ABCA1       | leukotriene A4 hydrolase                                                                                                       | 1965                       | 476                           | 7339                          | 783                              | 4                       | 0.000816709              |
| 221675_s_at  | CHPT1       | ATP-binding cassette, sub-family A (ABC1), member<br>1                                                                         | 1600                       | 343                           | 5964                          | 604                              | 4                       | 0.00068589               |
| 226185_at    | CDS1        | choline phosphotransferase 1                                                                                                   | 168                        | 101                           | 616                           | 102                              | 4                       | 0.004883776              |
| 213624_at    | SMPDL3A     | CDP-diacylglycerol synthase (phosphatidate<br>cytidyltransferase) 1                                                            | 1101                       | 455                           | 4006                          | 1278                             | 4                       | 0.006255972              |
| 228972_at    | SPHK1       | sphingomyelin phosphodiesterase, acid-like 3A                                                                                  | 84                         | 28                            | 302                           | 59                               | 4                       | 0.003571311              |
| 219257_s_at  | SPHK1       | phosphatidylinositol transfer protein, alpha<br>sphingosine kinase 1                                                           | 189                        | 54                            | 668                           | 107                              | 4                       | 0.0014003                |
| 223465_at    | COL4A3BP    | collagen, type IV, alpha 3 (Goodpasture antigen)<br>binding protein                                                            | 671                        | 283                           | 2315                          | 255                              | 3                       | 0.00227788               |
| 214285_at    | FABP3       | fatty acid binding protein 3, muscle and heart<br>(mammary-derived growth inhibitor)                                           | 588                        | 349                           | 2021                          | 318                              | 3                       | 0.007613028              |
| 226728_at    | SLC27A1     | solute carrier family 27 (fatty acid transporter),<br>member 1                                                                 | 863                        | 111                           | 2923                          | 857                              | 3                       | 0.003121689              |
| 204466_s_at  | SNCA        | synuclein, alpha (non A4 component of amyloid<br>precursor)                                                                    | 419                        | 103                           | 1409                          | 447                              | 3                       | 0.006980999              |
| 218285_s_at  | DHRS6       | 3-hydroxybutyrate dehydrogenase, type 2                                                                                        | 873                        | 351                           | 2917                          | 667                              | 3                       | 0.007139148              |
| 225970_at    | DDHD1       | DDHD domain containing 1                                                                                                       | 441                        | 113                           | 1424                          | 434                              | 3                       | 0.004241432              |
| 222262_s_at  | EK1         | ethanolamine kinase 1                                                                                                          | 507                        | 92                            | 1575                          | 370                              | 3                       | 0.002050574              |
| 213902_at    | ASAH1       | N-acylsphingosine amidohydrolase (acid<br>ceramidase) 1                                                                        | 1708                       | 581                           | 5120                          | 673                              | 3                       | 0.003027398              |
| 213511_s_at  | MTMR1       | myotubularin related protein 1                                                                                                 | 1778                       | 364                           | 5328                          | 1395                             | 3                       | 0.003592879              |
| 206214_at    | PLA2G7      | phospholipase A2, group VII (platelet-activating<br>factor acetylhydrolase, plasma)                                            | 7130                       | 3035                          | 20948                         | 5682                             | 3                       | 0.008117819              |
| 208848_at    | ADH5        | alcohol dehydrogenase 5 (class III), chi polypeptide,<br>pseudogene 4; alcohol dehydrogenase 5 (class III),<br>chi polypeptide | 1010                       | 293                           | 2950                          | 221                              | 3                       | 0.002105289              |
| 242963_at    | MGC26963    | sphingomyelin synthase 2                                                                                                       | 48                         | 8                             | 137                           | 34                               | 3                       | 0.003526202              |
| 221005_s_at  | PTDSS2      | phosphatidylserine synthase 2                                                                                                  | 126                        | 49                            | 346                           | 49                               | 3                       | 0.006294694              |
| 210589_s_at  | GBA         | glucosidase, beta; acid (includes<br>glucosylceramidase)                                                                       | 1281                       | 509                           | 3461                          | 458                              | 3                       | 0.005354131              |
| 48031_r_at   | C5orf4      | chromosome 5 open reading frame 4                                                                                              | 195                        | 65                            | 521                           | 46                               | 3                       | 0.004291214              |
| 231732_at    | SMPD3       | sphingomyelin phosphodiesterase 3, neutral<br>membrane (neutral sphingomyelinase II)                                           | 34                         | 10                            | 91                            | 21                               | 3                       | 0.006550021              |
| 223912_s_at  | CLN8        | ceroid-lipofuscinosis, neuronal 8 (epilepsy,<br>progressive with mental retardation)                                           | 543                        | 154                           | 1425                          | 119                              | 3                       | 0.002520101              |
| 212862_at    | CDS2        | CDP-diacylglycerol synthase (phosphatidate<br>cytidyltransferase) 2                                                            | 1443                       | 374                           | 3725                          | 760                              | 3                       | 0.005902598              |
| 214866_at    | PLAUR       | plasminogen activator, urokinase receptor                                                                                      | 733                        | 115                           | 1833                          | 319                              | 2                       | 0.002810364              |
| 235703_at    | PLB1        | phospholipase B1                                                                                                               | 115                        | 37                            | 287                           | 43                               | 2                       | 0.006877699              |
| 211810_s_at  | GALC        | galactosylceramidase                                                                                                           | 263                        | 54                            | 634                           | 97                               | 2                       | 0.003605117              |
| 205401_at    | AGPS        | alkylglycerone phosphate synthase                                                                                              | 1507                       | 313                           | 3631                          | 420                              | 2                       | 0.00288785               |
| 209707_at    | PIGK        | phosphatidylinositol glycan anchor biosynthesis,<br>class K                                                                    | 1018                       | 86                            | 2378                          | 349                              | 2                       | 0.002568779              |
| 214430_at    | GLA         | galactosidase, alpha                                                                                                           | 6222                       | 1121                          | 14473                         | 2169                             | 2                       | 0.003804612              |

|             |          |                                                                                          |      |      |       |      |   |             |
|-------------|----------|------------------------------------------------------------------------------------------|------|------|-------|------|---|-------------|
| 205639_at   | AOAH     | acyloxyacyl hydrolase (neutrophil)                                                       | 973  | 153  | 2213  | 235  | 2 | 0.002809076 |
| 221767_x_at | HDLBP    | high density lipoprotein binding protein                                                 | 3266 | 453  | 7362  | 1679 | 2 | 0.007300438 |
| 228817_at   | DIBD1    | asparagine-linked glycosylation 9, alpha-1,2-mannosyltransferase homolog (S. cerevisiae) | 189  | 16   | 425   | 93   | 2 | 0.00681331  |
| 218454_at   | FLI22662 | phospholipase B domain containing 1                                                      | 5245 | 1371 | 11326 | 1663 | 2 | 0.008630009 |
| 218047_at   | OSBPL9   | oxysterol binding protein-like 9                                                         | 2963 | 183  | 6345  | 1454 | 2 | 0.007695121 |
| 218739_at   | ABHD5    | abhydrolase domain containing 5                                                          | 455  | 26   | 960   | 237  | 2 | 0.009709121 |
| 218855_at   | TPRA40   | G protein-coupled receptor 175                                                           | 442  | 72   | 910   | 129  | 2 | 0.006519674 |
| 226636_at   | PLD1     | phospholipase D1, phosphatidylcholine-specific                                           | 421  | 44   | 862   | 112  | 2 | 0.003849906 |

### Supplemental Table 3

Affymetrix expression of genes encoding cytokines previously described in the regulation of lipid metabolism in foamy macrophages.

| probeset    | gene symbol | Gene Name                         | DC<br>(mean<br>expression) | DC<br>(standard<br>deviation) | DC-17<br>(mean<br>expression) | DC-17<br>(standard<br>deviation) | fold-change<br>DC-17/DC |
|-------------|-------------|-----------------------------------|----------------------------|-------------------------------|-------------------------------|----------------------------------|-------------------------|
| 210354_at   | IFNG        | Interferon gamma                  | 70                         | 26                            | 30                            | 18                               | 0,4                     |
| 205067_at   | IL1B        | interleukin 1, beta               | 212                        | 34                            | 845                           | 371                              | 4,0                     |
| 207113_s_at | TNF         | tumor necrosis factor             | 152                        | 65                            | 131                           | 95                               | 0,9                     |
| 243977_at   | IL6         | interleukin 6                     | 113                        | 94                            | 97                            | 50                               | 0,9                     |
| 201506_at   | TGFBI       | transforming growth factor beta 1 | 50452                      | 7430                          | 42067                         | 7145                             | 0,8                     |
| 209821_at   | IL33        | interleukin 33                    | 5                          | 6                             | 8                             | 7                                | 1,5                     |
| 207433_at   | IL10        | interleukin 10                    | 359                        | 132                           | 528                           | 290                              | 1,5                     |
